# Supplementary material for: Thiocarbonylphosphorane and arsorane ligands
Source: Royal Society of Chemistry journal article supplement (doi:10.1039/d2cc03747e), 2022-01-01
Supplement: d2cc03747e1.pdf [file d2cc03747e1.pdf]

## ELECTRONIC SUPPORTING INFORMATION

### Thiocarbonylphosphorane and Arsorane Ligands

Liam K. Burt, Anthony F. Hill\* and Stephanie L. Jones

Received 00th July 2022,  
Accepted 00th August 2022

DOI: 10.1039/x0xx00000x

---

*Research School of Chemistry, The Australian National University, Canberra, ACT  
0200, Australia. Email: [a.hill@anu.edu.au](mailto:a.hill@anu.edu.au)*

CDCC 2180154–2180156 contain the supplementary crystallographic data for this paper, and are available free of charge from The Cambridge Crystallographic Data Centre

## General Considerations

Experimental work was performed using standard Schlenk techniques using dried and pre-purified nitrogen or in an inert atmosphere glove-box charged with an argon atmosphere unless specified otherwise. Reactions employed dried and degassed solvents distilled over sodium and benzophenone (ethers, arenes and paraffins) or calcium hydride ( $\text{CH}_2\text{Cl}_2$ , MeCN). The compounds  $[\text{M}(\equiv\text{CBr})(\text{CO})_2(\text{Tp}^*)]$  ( $\text{M} = \text{Mo}, \text{W}$ )<sup>1</sup>  $[\text{W}(\equiv\text{CPR}_3)(\text{CO})_2(\text{Tp}^*)]\text{PF}_6$  ( $\text{R}_3 = \text{PPh}_3, \text{PMePh}_2, \text{PMe}_2\text{Ph}$  and  $\text{PCy}_3$ )<sup>2</sup> and  $[\text{W}(\equiv\text{CAsMePh}_2)(\text{CO})_2(\text{Tp}^*)]\text{OTf}$ <sup>3</sup> were prepared according to published procedures. All other reagents were used as received from commercial suppliers.

NMR spectra were obtained on a Bruker Avance 400 ( $^1\text{H}$  at 400.1,  $^{13}\text{C}\{^1\text{H}\}$  at 100.6,  $^{31}\text{P}\{^1\text{H}\}$  at 162.0 MHz) or a Bruker Avance 600 ( $^1\text{H}$  at 600.0,  $^{13}\text{C}\{^1\text{H}\}$  at 150.9 MHz) or a Bruker Avance 700 ( $^1\text{H}$  at 700.1,  $^{13}\text{C}\{^1\text{H}\}$  at 176.0 MHz) or a Bruker Avance 800 ( $^1\text{H}$  at 800.1,  $^{13}\text{C}\{^1\text{H}\}$  at 201.2 MHz) spectrometer at the temperatures indicated. Chemical shifts ( $\delta$ ) are reported in ppm with coupling constants given in Hz and are referenced to the solvent resonance or external references ( $\{85\% \text{H}_3\text{PO}_4$  in  $\text{H}_2\text{O}$  for  $^{31}\text{P}\{^1\text{H}\}$ ). The multiplicities of NMR resonances are denoted by the abbreviations s (singlet), d (doublet), t (triplet), m (multiplet), br (broad) and combinations thereof for more highly coupled systems. Where applicable, the stated multiplicity refers to that of the primary resonance exclusive of  $^{183}\text{W}$  satellites. In select cases, distinct peaks were observed in the  $^1\text{H}$  and  $^{13}\text{C}\{^1\text{H}\}$  NMR spectra, but to the level of accuracy that is reportable (*i.e.*, 2 decimal places for  $^1\text{H}$  NMR, 1 decimal place for  $^{13}\text{C}\{^1\text{H}\}$  NMR) they are reported as having the same chemical shift.

The abbreviation 'pz' is used to refer to the pyrazolyl rings on the hydridotris(3,5-dimethylpyrazol-1-yl)borate ( $\text{Tp}^*$ ) ligand. Spectra provided generally correspond to samples obtained directly from chromatography and may contain residual solvent as recrystallised samples often display reduced solubility. The BH protons give rise to very broad signals around 4–5 ppm in the  $^1\text{H}$  NMR spectra due to coupling to the quadrupolar boron nuclei. These are not listed in the experimental NMR data as their chemical shifts and associated integrals are not determined accurately. The BH unit, being remote from the metal centre of interest is not particularly responsive to variations and accordingly  $^{11}\text{B}\{^1\text{H}\}$  NMR spectra were not recorded.

Infrared spectra were obtained using a Shimadzu FTIR-8400 spectrometer (liquid) or Perkin Elmer FTIR Spectrum 2 (Solid State ATR, diamond anvil). Signals are denoted according to their absorption strength such as very sharp (vs), strong (s), medium (m), weak (w) or broad (br). Electronic spectra were collected at room temperature as a solution in 1 cm quartz cells using a PerkinElmer lambda 465 spectrophotometer. Solvates evident from data were confirmed where possible by NMR spectroscopy. High-resolution electrospray ionisation mass spectrometry (ESI-MS) was performed by the ANU Research School of Chemistry mass spectrometry service with acetonitrile, methanol or dichloromethane as the matrix. Elemental microanalytical data were provided by Macquarie University, Australia, with the caveat that compounds

containing B–N bonds are considered prone to incomplete oxidation in the combustion analysis (formation of refractory boron nitride materials)

Data for X-ray crystallography were collected with Agilent Xcalibur or SuperNova CCD diffractometers using Mo-K $\alpha$  radiation ( $\lambda = 0.71073 \text{ \AA}$ ) or Cu-K $\alpha$  radiation ( $\lambda = 1.54184 \text{ \AA}$ ) employing the *CrysAlis PRO* software.<sup>4</sup> The structures were solved by direct or Patterson methods and refined by full-matrix least-squares on  $F^2$  using the SHELXS or SHELXT and SHELXL programs.<sup>5</sup> Hydrogen atoms were located geometrically and refined using a riding model. Diagrams were produced using the CCDC visualisation program Mercury.<sup>6</sup>

Computational studies were performed by using the *SPARTAN20* suite of programs.<sup>7</sup> Geometry optimisation (gas Phase or with a polarisation continuum model with dielectric constant of 7.43) was performed at the DFT level of theory using the  $\omega\text{B97X-D}$  or  $\omega\text{B97X-V}$  exchange functional of Head-Gordon<sup>8</sup>. The Los Alamos effective core potential type basis set (LANL2DZ) of Hay and Wadt<sup>9</sup> was used for W and Te and Pople 6-31G\* basis sets<sup>10</sup> were used for all other atoms. Frequency calculations were performed to confirm that the optimized structure was a minimum and also to identify vibrational modes of interest (Table S2).<sup>11</sup> Cartesian atomic coordinates are provided in the electronic supporting information.

## Compound Descriptors

**a** =  $\text{PPh}_3$ , **b** =  $\text{PMePh}_2$  or  $\text{AsMePh}_2$ , **c** =  $\text{PMe}_2\text{Ph}$ , **d** =  $\text{PCy}_3$ .

## Electronic data of published phosphonocarbynes 1a-1d

For comparison with data for thiocarbonylphosphorane and arsorane complexes, the previously unreported electronic spectra of the precursor phosphonocarbynes were recorded.

$[\text{W}(\equiv\text{CPh}_3)(\text{CO})_2(\text{Tp}^*)]\text{PF}_6$  (**1a**)—UV-Vis [ $2.319(2)\times 10^{-4} \text{ molL}^{-1}$ ,  $\text{nm}(\epsilon, \text{Lmol}^{-1}\text{cm}^{-1})$ ,  $\text{CH}_2\text{Cl}_2$ ]:  $\lambda_{\text{max}} = 262 \text{ sh (7103), 314 sh (3589), 521 (451)}$ .

$[\text{W}(\equiv\text{CPMePh}_2)(\text{CO})_2(\text{Tp}^*)]\text{PF}_6$  (**1b**)—UV-Vis [ $2.404(2)\times 10^{-4} \text{ molL}^{-1}$ ,  $\text{nm}(\epsilon, \text{Lmol}^{-1}\text{cm}^{-1})$ ,  $\text{CH}_2\text{Cl}_2$ ]:  $\lambda_{\text{max}} = 260 \text{ sh (6938), 304 (3922), 502 (297)}$ .

$[\text{W}(\equiv\text{CPMe}_2\text{Ph})(\text{CO})_2(\text{Tp}^*)]\text{PF}_6$  (**1c**)—UV-Vis [ $2.475\times 10^{-4} \text{ molL}^{-1}$ ,  $\text{nm}(\epsilon, \text{Lmol}^{-1}\text{cm}^{-1})$ ,  $\text{CH}_2\text{Cl}_2$ ]:  $\lambda_{\text{max}} = 268 \text{ sh (6467), 303 sh (3841), 503 (404)}$ .

$[\text{W}(\equiv\text{CPCy}_3)(\text{CO})_2(\text{Tp}^*)]\text{PF}_6$  (**1d**)—UV-Vis [ $2.830\times 10^{-4} \text{ molL}^{-1}$ ,  $\text{nm}(\epsilon, \text{Lmol}^{-1}\text{cm}^{-1})$ ,  $\text{CH}_2\text{Cl}_2$ ]:  $\lambda_{\text{max}} = 264 \text{ sh (5776), 303 sh (3128), 496 (378)}$ .

**Synthesis of  $[\text{W}(\text{SCPPH}_3)(\text{CO})_2(\text{Tp}^*)]\text{PF}_6\cdot 2(\text{C}_4\text{H}_8\text{O})$  (**2a**).** – A mixture of  $[\text{W}(\equiv\text{CPh}_3)(\text{CO})_2(\text{Tp}^*)]\text{PF}_6$  (**1a**: 202 mg, 0.211 mmol) and elemental sulfur (32 mg, 1.00 mg.atom, 5/8 equiv.  $\text{S}_8$ ) were heated under reflux in THF (10 mL) for 2 hours. The volatiles were removed under reduced pressure and the crude residue was purified by flash chromatography through silica gel, eluting with 2% THF/ $\text{CH}_2\text{Cl}_2$ . The complex crystallised spontaneously upon solvent evaporation and

was collected *via* vacuum filtration, washing with toluene (4 x 10 mL) and *n*-hexane (4 x 10 mL) before drying *in vacuo* for 16 hours. This gave a THF bis-solvate (confirmed by NMR integration) of the title compound as a blue crystalline powder. Yield: 162 mg (0.144 mmol, 68%). Crystals of a toluene solvate suitable for single crystal X-ray diffraction were grown by solvent diffusion of a CH<sub>2</sub>Cl<sub>2</sub> solution of title compound layered with toluene, stored at 5 °C. IR (CH<sub>2</sub>Cl<sub>2</sub>, cm<sup>-1</sup>): 2006 vs ν<sub>CO</sub>, 1919 vs ν<sub>CO</sub>. IR (ATR, cm<sup>-1</sup>): 2574 w ν<sub>BH</sub>, 1992 vs ν<sub>CO</sub>, 1908 vs ν<sub>CO</sub>, 839 vs ν<sub>PF</sub>. UV-Vis [2.420(2) × 10<sup>-5</sup> mol L<sup>-1</sup>, nm (ε, L mol<sup>-1</sup> cm<sup>-1</sup>), CH<sub>2</sub>Cl<sub>2</sub>]: λ<sub>max</sub> = 269 (21820), 562 sh (15760), 627 (2222). <sup>1</sup>H NMR (400 MHz, CD<sub>2</sub>Cl<sub>2</sub>, 25 °C): δ<sub>H</sub> = 7.89 (m, C<sub>6</sub>H<sub>5</sub>), 7.76 (m, C<sub>6</sub>H<sub>5</sub>), 5.99 (s, 3 H pzCH), 3.68 (m, 8 H, THF), 2.45 (s, 6 H, pzCH<sub>3</sub>), 2.36 (s, 3 H, pzCH<sub>3</sub>), 2.30 (s, 3 H, pzCH<sub>3</sub>), 2.20 (s, 6 H, pzCH<sub>3</sub>), 1.82 (m, 8 H, THF). <sup>13</sup>C{<sup>1</sup>H} NMR (151 MHz, CD<sub>2</sub>Cl<sub>2</sub>, 25 °C): δ<sub>C</sub> = 223.4 (d, <sup>3</sup>J<sub>CP</sub> = 7 Hz, <sup>1</sup>J<sub>CW</sub> = 145 Hz, CO), 220.7 (d, <sup>1</sup>J<sub>CP</sub> = 54 Hz, <sup>1</sup>J<sub>CW</sub> = 46 Hz, SCP), 153.9, 152.8, [C<sup>5</sup>(pz)], 147.4, 146.5 [C<sup>3</sup>(pz)], 136.3 [d, <sup>4</sup>J<sub>CP</sub> = 3 Hz, C<sup>4</sup>(C<sub>6</sub>H<sub>5</sub>)], 134.8 [d, <sup>2</sup>J<sub>CP</sub> = 11 Hz, C<sup>2,6</sup>(C<sub>6</sub>H<sub>5</sub>)], 131.0 [d, <sup>3</sup>J<sub>CP</sub> = 13 Hz, C<sup>3,5</sup>(C<sub>6</sub>H<sub>5</sub>)], 119.2 [d, <sup>1</sup>J<sub>CP</sub> = 91 Hz, C<sup>1</sup>(C<sub>6</sub>H<sub>5</sub>)], 109.3, 108.3 [C<sup>4</sup>(pz)], 68.3 [THF], 26.2 [THF], 16.4, 14.7, 13.5, 12.9 (pzCH<sub>3</sub>). <sup>31</sup>P{<sup>1</sup>H} NMR (162 MHz, CDCl<sub>3</sub>, 25 °C): δ<sub>P</sub> = 26.84 (s, <sup>2</sup>J<sub>PW</sub> = 91 Hz), -144.9 [hept, <sup>1</sup>J<sub>PF</sub> = 706 Hz, PF<sub>6</sub>]. MS (ESI, +ve ion, *m/z*): Found: 843.2034. Calcd for C<sub>36</sub>H<sub>37</sub><sup>11</sup>BN<sub>6</sub>O<sub>2</sub>P<sup>32</sup>S<sup>184</sup>W [M]<sup>+</sup>: 843.20332. Satisfactory analytical data were not obtained, possibly due to desolvation or air-sensitivity during shipping. Anal. Found: C, 41.66; H, 3.83; N, 7.43%. Calcd for C<sub>36</sub>H<sub>37</sub>BF<sub>6</sub>N<sub>6</sub>O<sub>2</sub>P<sub>2</sub>SW: C, 43.75; H, 3.77; N, 8.50. *Crystal data for C<sub>36</sub>H<sub>37</sub>BN<sub>6</sub>O<sub>2</sub>PSW·PF<sub>6</sub>·C<sub>7</sub>H<sub>8</sub>, M<sub>w</sub> = 1080.46 gmol<sup>-1</sup>, monoclinic, I2/a, a = 25.2847(5) Å, b = 13.3933(3) Å, c = 28.4487(5) Å, β = 92.090(2)°, V = 9627.6(3) Å<sup>3</sup>, Z = 8, D<sub>calc</sub> = 1.491 Mgm<sup>-3</sup>, μ(Cu Kα) = 6.03 mm<sup>-1</sup>, T = 150.0(1) K, clear dark blue plate, 0.30 × 0.10 × 0.07 mm, 8711 independent measured reflections (2θ<sub>max</sub> = 146.6°), R<sub>1</sub> = 0.064, wR<sub>2</sub> = 0.173 for 7942 reflections [I > 2σ(I)], 596 parameters, without restraints. CDCC 2180154.*

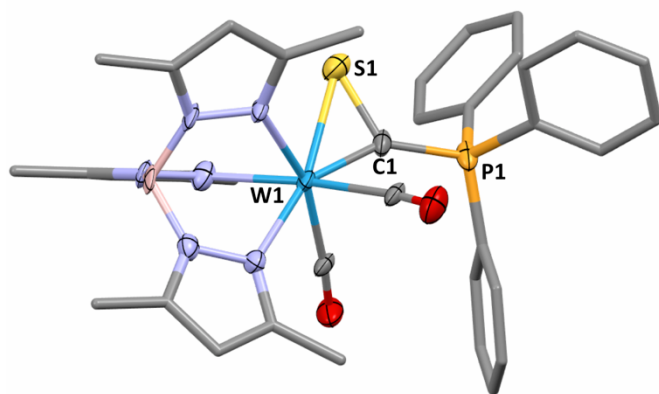

**Figure S1:** Molecular structure of the cation of **2b** in a crystal of **2b**·C<sub>7</sub>H<sub>8</sub> (50% displacement ellipsoids, pyrazolyl and phenyl rings simplified. Solvent, hydrogens and PF<sub>6</sub> anion omitted).

**Synthesis of [W(SCPMePh<sub>2</sub>)(CO)<sub>2</sub>(Tp\*)]PF<sub>6</sub> (**2b**).** A sample of [W(≡CPMePh<sub>2</sub>)(CO)<sub>2</sub>(Tp\*)]PF<sub>6</sub> (**1b**: 0.101 g, 0.113 mmol) and elemental sulfur (18 mg, 0.56 mg.atom) were heated under reflux in THF (10 mL) for 6 hours. The initially pink solution darkened quickly to a deep blue colour, with this transformation clearly visible 2 hours

into the reaction. The reaction mixture was cooled and solvent was removed under reduced pressure before being dissolved in CH<sub>2</sub>Cl<sub>2</sub> (~2 mL) and diluted with Et<sub>2</sub>O (20 mL) to afford a dark blue precipitate in addition to a pale pink supernatant. The deep blue solid was collected *via* vacuum filtration, washing with Et<sub>2</sub>O (2 × 10 mL) and *n*-pentane (3 × 10 mL) before drying *in vacuo* for 16 hours. The title compound was obtained as a blue crystalline powder that resists dissolution in CHCl<sub>3</sub>, Et<sub>2</sub>O and hydrocarbons but is soluble in CH<sub>2</sub>Cl<sub>2</sub>, MeCN, THF or DMSO. Yield: 0.080 g (0.086 mmol, 76%). Crystals suitable for single crystal x-ray diffraction were grown from the liquid-liquid diffusion of Et<sub>2</sub>O layered on a MeCN solution of the compound at -20 °C under an argon atmosphere over a week. IR (CH<sub>2</sub>Cl<sub>2</sub>, cm<sup>-1</sup>): 1998 vs ν<sub>CO</sub>, 1914 vs ν<sub>CO</sub>. IR (ATR, cm<sup>-1</sup>): 2563 w ν<sub>BH</sub>, 1998 vs ν<sub>CO</sub>, 1902 vs ν<sub>CO</sub>, 836 vs ν<sub>PF</sub>. UV-Vis [2.610(3) × 10<sup>-5</sup> mol L<sup>-1</sup>, nm (ε, L mol<sup>-1</sup> cm<sup>-1</sup>), CH<sub>2</sub>Cl<sub>2</sub>]: λ<sub>max</sub> = 266 sh (19520), 569 (1517), 622 (1520). <sup>1</sup>H NMR (700 MHz, CD<sub>2</sub>Cl<sub>2</sub>, 25 °C): δ<sub>H</sub> = 7.89 (m, 6 H, C<sub>6</sub>H<sub>5</sub>), 7.73 (m, 4 H, C<sub>6</sub>H<sub>5</sub>), 6.02 (s, 1 H, pzCH), 5.95 (s, 2 H, pzCH), 2.85 (d, <sup>2</sup>J<sub>HP</sub> = 13 Hz, 3 H, PCH<sub>3</sub>), 2.44 (overlapping s, 3 H, pzCH<sub>3</sub>), 2.43 (overlapping s, 6 H, pzCH<sub>3</sub>), 2.37 (s, 3 H, pzCH<sub>3</sub>), 1.96 (s, 6 H, pzCH<sub>3</sub>). <sup>13</sup>C{<sup>1</sup>H} NMR (151 MHz, CD<sub>2</sub>Cl<sub>2</sub>, 25 °C): δ<sub>C</sub> = 223.4 (d, <sup>3</sup>J<sub>CP</sub> = 7 Hz, <sup>1</sup>J<sub>CW</sub> = 145 Hz, CO), 219.0 (d, <sup>1</sup>J<sub>CP</sub> = 56 Hz, <sup>1</sup>J<sub>CW</sub> not resolved, SCP), 153.9, 152.7 [C<sup>5</sup>(pz)], 147.3 146.3 [C<sup>3</sup>(pz)], 135.9 [d, <sup>4</sup>J<sub>CP</sub> = 4 Hz, C<sup>4</sup>(C<sub>6</sub>H<sub>5</sub>)], 133.1 [d, <sup>2</sup>J<sub>CP</sub> = 10 Hz, C<sup>2,6</sup>(C<sub>6</sub>H<sub>5</sub>)], 130.8 [d, <sup>3</sup>J<sub>CP</sub> = 13 Hz, C<sup>3,5</sup>(C<sub>6</sub>H<sub>5</sub>)], 119.6 [d, <sup>1</sup>J<sub>CP</sub> = 90 Hz, C<sup>1</sup>(C<sub>6</sub>H<sub>5</sub>)], 109.1, 108.2 [C<sup>4</sup>(pz)], 16.4, 14.0, 13.4, 12.7 (pzCH<sub>3</sub>), 9.9 (d, <sup>1</sup>J<sub>CP</sub> = 59 Hz, PCH<sub>3</sub>). <sup>31</sup>P{<sup>1</sup>H} NMR (283 MHz, CD<sub>2</sub>Cl<sub>2</sub>, 25 °C): δ<sub>P</sub> = 26.39 (s, <sup>2</sup>J<sub>PW</sub> = 21 Hz, PCH<sub>3</sub>), -144.5 (hept, <sup>1</sup>J<sub>PF</sub> = 706 Hz, PF<sub>6</sub>). MS (ESI, +ve ion, *m/z*): Found: 781.1900. Calcd for C<sub>31</sub>H<sub>35</sub><sup>11</sup>BN<sub>6</sub>O<sub>2</sub>P<sup>184</sup>W [M]<sup>+</sup>: 781.1882. Anal. Found: C, 40.20; H, 3.77; N, 9.07%. Calcd for C<sub>31</sub>H<sub>35</sub>BF<sub>6</sub>N<sub>6</sub>O<sub>2</sub>P<sub>2</sub>SW: C, 40.20; H, 3.81; N, 9.07%. *Crystal data for C<sub>31</sub>H<sub>35</sub>BN<sub>6</sub>O<sub>2</sub>PSW·PF<sub>6</sub>·2(C<sub>2</sub>H<sub>3</sub>N), M<sub>w</sub> = 1008.42 gmol<sup>-1</sup>, monoclinic, P2<sub>1</sub>/c, a = 14.1710(2) Å, b = 13.2958(1) Å, c = 22.8330(3) Å, β = 103.452(1)°, V = 4184.05(9) Å<sup>3</sup>, Z = 4, D<sub>calc</sub> = 1.601 Mgm<sup>-3</sup>, μ(Cu Kα) = 6.91 mm<sup>-1</sup>, T = 150.0(1) K, clear dark blue plate, 0.14 × 0.09 × 0.03 mm, 7935 independent measured reflections (2θ<sub>max</sub> = 147.2°), R<sub>1</sub> = 0.027, wR<sub>2</sub> = 0.065 for 7020 reflections [I > 2σ(I)], 514 parameters without restraints. CDCC 2180155.*

**Synthesis of [W(SCPMe<sub>2</sub>Ph)(CO)<sub>2</sub>(Tp\*)]PF<sub>6</sub> (**2c**).** A sample of [W(≡CPMe<sub>2</sub>Ph)(CO)<sub>2</sub>(Tp\*)]PF<sub>6</sub> (**1c**: 0.099 g, 0.119 mmol) and elemental sulfur (0.038 g, 1.2 mg.atom) were heated under reflux in THF (10 mL) over 6 hours. The initially peach-coloured solution darkened quickly to a deep blue colour by 1 hour and transitioned to the final indigo colour by 2 hours. The reaction mixture was cooled and solvent removed under reduced pressure before dissolving in minimal CH<sub>2</sub>Cl<sub>2</sub> (~2 mL). Et<sub>2</sub>O (20 mL) was added to precipitate an indigo coloured solid and a pale orange supernatant phase. The precipitate was isolated by vacuum filtration and subsequently washed with Et<sub>2</sub>O (3 × 10 mL) and *n*-pentane (3 × 5 mL) before drying *in vacuo* for 16 hours. The title compound was obtained as an indigo crystalline powder that resists dissolution in CHCl<sub>3</sub>, Et<sub>2</sub>O and hydrocarbons but is soluble in CH<sub>2</sub>Cl<sub>2</sub>, MeCN, THF or DMSO. Yield: 0.090 g (0.104 mmol, 87%). IR (CH<sub>2</sub>Cl<sub>2</sub>, cm<sup>-1</sup>): 1999 vs ν<sub>CO</sub>, 1912 vs ν<sub>CO</sub>. IR (ATR, cm<sup>-1</sup>): 2557 w ν<sub>BH</sub>, 2001 vs ν<sub>CO</sub>, 1884 vs ν<sub>CO</sub>, 836 vs ν<sub>PF</sub>. UV-Vis [2.498(3) × 10<sup>-5</sup> mol L<sup>-1</sup>, nm (ε, L mol<sup>-1</sup> cm<sup>-1</sup>), CH<sub>2</sub>Cl<sub>2</sub>]: λ<sub>max</sub> = 267 (18520), 552 (1531), 627 (1324). <sup>1</sup>H NMR (600 MHz, CD<sub>2</sub>Cl<sub>2</sub>, 25 °C): δ<sub>H</sub> = 7.95 (dd, *J*<sub>HH</sub> = 13, 8 Hz, 2 H, C<sub>6</sub>H<sub>5</sub>), 7.85 (t, *J*<sub>HH</sub> = 8 Hz, 1 H, C<sub>6</sub>H<sub>5</sub>), 7.74 (m, 2 H, C<sub>6</sub>H<sub>5</sub>), 6.01 (s, 1 H, pzCH), 5.93 (s, 2 H, pzCH), 2.55 (d, <sup>2</sup>J<sub>HP</sub> =

13 Hz, 6 H, PCH<sub>3</sub>), 2.45 (s, 3 H, pzCH<sub>3</sub>), 2.42 (s, 6 H, pzCH<sub>3</sub>), 2.37 (s, 3 H, pzCH<sub>3</sub>), 1.94 (s, 6 H, pzCH<sub>3</sub>). <sup>13</sup>C{<sup>1</sup>H} NMR (151 MHz, CD<sub>2</sub>Cl<sub>2</sub>, 25 °C): δ<sub>C</sub> = 223.5 (d, <sup>3</sup>J<sub>CP</sub> = 6 Hz, <sup>1</sup>J<sub>CW</sub> = 144 Hz, CO), 222.3 (d, <sup>1</sup>J<sub>CP</sub> = 56 Hz, <sup>1</sup>J<sub>CP</sub> = 55 Hz, SCP), 154.0, 153.0 [C<sup>5</sup>(pz)], 147.4, 146.3 [C<sup>3</sup>(pz)], 136.0 [d, <sup>4</sup>J<sub>CP</sub> = 3 Hz, C<sup>4</sup>(C<sub>6</sub>H<sub>5</sub>)], 131.9 [d, <sup>2</sup>J<sub>CP</sub> = 10 Hz, C<sup>2,6</sup>(C<sub>6</sub>H<sub>5</sub>)], 130.8 [d, <sup>3</sup>J<sub>CP</sub> = 13 Hz, C<sup>3,5</sup>(C<sub>6</sub>H<sub>5</sub>)], 119.5 [d, <sup>1</sup>J<sub>CP</sub> = 88 Hz, C<sup>1</sup>(C<sub>6</sub>H<sub>5</sub>)], 109.1, 108.3 [C<sup>4</sup>(pz)], 16.6, 14.2, 13.6, 12.8 (pzCH<sub>3</sub>), 9.3 (d, <sup>1</sup>J<sub>CP</sub> = 59 Hz, PCH<sub>3</sub>). <sup>31</sup>P{<sup>1</sup>H} NMR (162 MHz, CD<sub>3</sub>CN, 25 °C): δ<sub>P</sub> = 30.40 (s, <sup>2</sup>J<sub>PW</sub> = 20 Hz, PCH<sub>3</sub>), -144.6 [hept, <sup>1</sup>J<sub>PF</sub> = 706 Hz, PF<sub>6</sub>]. MS (ESI, +ve ion, *m/z*): Found: 719.1733. Calcd for C<sub>26</sub>H<sub>33</sub><sup>11</sup>BN<sub>6</sub>O<sub>2</sub>PS<sup>184</sup>W [M]<sup>+</sup>: 719.1726. Anal. Found: C, 36.08; H, 3.83; N, 9.74; S, 3.99%. Calcd for C<sub>26</sub>H<sub>33</sub>BF<sub>6</sub>N<sub>6</sub>O<sub>2</sub>P<sub>2</sub>SW: C, 36.13; H, 3.85; N, 9.72; S, 3.71%. Single crystals suitable for x-ray diffraction were not successfully acquired.

**Synthesis of [W(SCPCy<sub>3</sub>)(CO)<sub>2</sub>(Tp\*)]PF<sub>6</sub> (2d).** A sample of [W(≡CPCy<sub>3</sub>)(CO)<sub>2</sub>(Tp\*)]PF<sub>6</sub> (**1d**: 0.200 g, 0.205 mmol) and elemental sulfur (0.070 g, 2.2 mg.atom) were heated under reflux in THF (10 mL) over 16 hours. The initially orange suspension changed slowly due to poor solubility, although a deep blue colour developed overnight. TLC identified the prolonged heating resulted in several unidentified decomposition species, hence the reaction mixture was purified by short column chromatography (silica gel, N<sub>2</sub>, CH<sub>2</sub>Cl<sub>2</sub>/THF gradient elution). Neat CH<sub>2</sub>Cl<sub>2</sub> elution resulted in a black fraction wherein species could not be identified by spectroscopic analysis and this was discarded. Further elution with 2% THF/CH<sub>2</sub>Cl<sub>2</sub> provided a deep blue band. This blue eluate was evaporated to dryness under reduced pressure and dissolved in a minimum of CHCl<sub>3</sub> (~2 mL) before precipitation of a dark blue solid with Et<sub>2</sub>O (20 mL). The resulting solid was collected *via* vacuum filtration, washed with cold 50% CHCl<sub>3</sub>/Et<sub>2</sub>O until the washings were clear and somewhat pale blue (yield sacrificed for purity) and Et<sub>2</sub>O (3 × 10 mL) before drying *in vacuo* for 16 hours. The title compound was obtained as a blue crystalline powder, although repeatably contained parent phosphonocarbyne that resisted removal during purification without decomposition of the title species. Yield: 0.166 g (0.165 mmol, 80% yield at ~90% purity). Crystals suitable for single-crystal X-ray diffraction were grown from the slow evaporation of a CH<sub>2</sub>Cl<sub>2</sub> solution of title compound layered with toluene, stored at 5 °C overnight. Crystals formed, however, no adequate structural model could be developed due to poor data from weak diffraction. Synchrotron radiation did not improve the collected dataset.

IR (CH<sub>2</sub>Cl<sub>2</sub>, cm<sup>-1</sup>): 1996 vs ν<sub>CO</sub>, 1911 vs ν<sub>CO</sub>. IR (ATR, cm<sup>-1</sup>): 2571 w ν<sub>BH</sub>, 1981 vs ν<sub>CO</sub>, 1894 vs ν<sub>CO</sub>, 840 vs ν<sub>PF</sub>. UV-Vis [3.922(4) × 10<sup>-5</sup> mol L<sup>-1</sup>, nm (ε, Lmol<sup>-1</sup>cm<sup>-1</sup>), CH<sub>2</sub>Cl<sub>2</sub>]: λ<sub>max</sub> = 255 (18440), 281 sh (13220), 627 (1175). <sup>1</sup>H NMR (400 MHz, CD<sub>2</sub>Cl<sub>2</sub>, 25 °C): δ<sub>H</sub> = 6.09 (s, 1 H, pzCH), 6.02 (s, 2 H, pzCH), 2.51 (s, 3 H, pzCH<sub>3</sub>), 2.49 (s, 6 H, pzCH<sub>3</sub>), 2.43 (s, 3 H, pzCH<sub>3</sub>), 2.25 (s, 6 H, pzCH<sub>3</sub>), 2.04 (br.m, 10 H, PC<sub>6</sub>H<sub>11</sub>), 1.86 (m, 10 H, PCH<sub>2</sub>), 1.44 (m, 10 H, PCH<sub>2</sub>). Cyclohexyl <sup>1</sup>H resonances overlap with those of the impurity and therefore were not able to be assigned with certainty even from 2-D correlation spectra. <sup>13</sup>C{<sup>1</sup>H} NMR (151 MHz, CD<sub>2</sub>Cl<sub>2</sub>, 25 °C): δ<sub>C</sub> = 226.8 (d, <sup>3</sup>J<sub>CP</sub> = 4; <sup>1</sup>J<sub>CW</sub> = 149 Hz, CO), 222.7 (d, <sup>1</sup>J<sub>CP</sub> = 30; <sup>1</sup>J<sub>CW</sub> = 45 Hz, SCP), 153.5, 152.4 [C<sup>5</sup>(pz)], 147.2, 146.2 [C<sup>3</sup>(pz)], 109.3, 108.2 [C<sup>4</sup>(pz)], 35.3 [d, <sup>1</sup>J<sub>CP</sub> = 39 Hz, C<sup>1</sup>(C<sub>6</sub>H<sub>11</sub>)], 28.3 [d, <sup>3</sup>J<sub>CP</sub> = 4 Hz, C<sup>3,5</sup>(C<sub>6</sub>H<sub>11</sub>)], 27.2 [d, <sup>2</sup>J<sub>CP</sub> = 12 Hz, C<sup>2,6</sup>(C<sub>6</sub>H<sub>11</sub>)], 25.8 [C<sup>4</sup>(C<sub>6</sub>H<sub>11</sub>)], 16.1, 14.8, 13.4, 12.8 (pzCH<sub>3</sub>). <sup>31</sup>P{<sup>1</sup>H} NMR (162 MHz, CD<sub>2</sub>Cl<sub>2</sub>, 25 °C): δ<sub>P</sub> = 41.95 (s, <sup>1</sup>J<sub>PW</sub> not resolved, PCy<sub>3</sub>), -144. [hept, <sup>1</sup>J<sub>PF</sub>

= 706 Hz, PF]. MS (ESI, +ve ion, *m/z*): Found: 861.3465. Calcd for C<sub>36</sub>H<sub>55</sub><sup>11</sup>BN<sub>6</sub>O<sub>2</sub>P<sup>32</sup>S<sup>184</sup>W [M]<sup>+</sup>: 861.34417.

**Synthesis of [W(CSAsMePh<sub>2</sub>)(CO)<sub>2</sub>(Tp\*)]OTf (7b).** A mixture of [W(≡CASMePh<sub>2</sub>)(CO)<sub>2</sub>(Tp\*)]OTf (**6b**: 0.090 g, 0.096 mmol) and elemental sulfur (0.040 g, 1.25 mg.atom) were heated under reflux in THF (20 mL) for 16 hours during which time the initially orange solution darkened slowly, eventually to give a dark purple/black coloured solution. Thin layer chromatographic monitoring identified that much of the reaction mixture converts to a series of dark coloured decomposition species that were not identified by <sup>1</sup>H NMR spectroscopy, but that the extended reaction time was needed to ensure complete consumption of the arsoniocarbyne precursor. The mixture was concentrated under reduced pressure (~2 mL) before dilution with Et<sub>2</sub>O to precipitate a dark solid from a black supernatant. The supernatant phase was removed *via* cannula filtration and the residue was thoroughly washed with Et<sub>2</sub>O (3 × 15 mL). The remaining dark solid was dried *in vacuo* before being redissolved in minimal CH<sub>2</sub>Cl<sub>2</sub> (~2 mL). Precipitation from CH<sub>2</sub>Cl<sub>2</sub> with Et<sub>2</sub>O (20 mL) resulted in a purple solid which was collected *via* vacuum filtration. This was washed with cold 50% CHCl<sub>3</sub>/Et<sub>2</sub>O until the washings were colourless followed by Et<sub>2</sub>O (2 × 10 mL) and drying *in vacuo*. This afforded the title compound as a deep purple solid, although some impurities remained the main one being [W(≡CASMePh<sub>2</sub>)(CO)<sub>2</sub>(Tp\*)]OTf although this represents reversible loss of sulfur. Yield 12 mg (0.012 mmol, 13%). Further attempts at purification resulted in the decomposition of the already diminished, minimal yield. The sample employed for spectroscopic analysis contained **6b** (ca 10%) that defied removal and is present as a minor impurity in spectra.

IR (CH<sub>2</sub>Cl<sub>2</sub>, cm<sup>-1</sup>): 1995 vs ν<sub>CO</sub>, 1909 vs ν<sub>CO</sub>. IR (ATR, cm<sup>-1</sup>): 2561 w ν<sub>BH</sub>, 1987 vs ν<sub>CO</sub>, 1897 vs ν<sub>CO</sub>, 863 vs ν<sub>OTf</sub>. <sup>1</sup>H NMR (800 MHz, CD<sub>2</sub>Cl<sub>2</sub>, 25 °C): δ<sub>H</sub> = 7.84 (m, 6 H, C<sub>6</sub>H<sub>5</sub>), 7.74 (m, 4 H, C<sub>6</sub>H<sub>5</sub>), 6.00 (s, 1 H, pzCH), 5.95 (s, 2 H, pzCH), 2.84 (s, 3 H, AsCH<sub>3</sub>), 2.42 (s, 6 H, pzCH<sub>3</sub>), 2.36 (s, 6 H, pzCH<sub>3</sub>), 2.04 (s, 6 H, pzCH<sub>3</sub>). <sup>13</sup>C{<sup>1</sup>H} NMR (200 MHz, CD<sub>2</sub>Cl<sub>2</sub>, 25 °C): δ<sub>C</sub> = 226.0 (<sup>1</sup>J<sub>CW</sub> = 41 Hz, SCAs), 223.4 (<sup>1</sup>J<sub>CW</sub> = 145 Hz, CO), 153.8, 152.7 [C<sup>5</sup>(pz)], 147.2, 146.2 [C<sup>3</sup>(pz)], 135.1 [C<sup>4</sup>(C<sub>6</sub>H<sub>5</sub>)], 132.4 [C<sup>2,6</sup>(C<sub>6</sub>H<sub>5</sub>)], 131.4 [C<sup>3,5</sup>(C<sub>6</sub>H<sub>5</sub>)], 128.9 [C<sup>1</sup>(C<sub>6</sub>H<sub>5</sub>)], 108.9, 108.1 [C<sup>4</sup>(pz)], 16.2, 14.1, 13.4, 12.7 (pzCH<sub>3</sub>), 8.8 (AsCH<sub>3</sub>). MS (ESI, *m/z*): Found: 825.1347. Calcd for C<sub>31</sub>H<sub>35</sub><sup>11</sup>BN<sub>6</sub>O<sub>2</sub><sup>75</sup>As<sup>32</sup>S<sup>184</sup>W [M]<sup>+</sup>: 825.1361. Insufficient material was obtained for the acquisition of elemental microanalytical data.

**Synthesis of [Mo(≡CPPH<sub>3</sub>)(CO)<sub>2</sub>(Tp\*)]PF<sub>6</sub> (3a).** A mixture of [Mo(≡CBr)(CO)<sub>2</sub>(Tp\*)] (0.999 g, 1.85 mmol), PPh<sub>3</sub> (0.537 g, 2.05 mmol) and NaPF<sub>6</sub> (0.360 g, 2.14 mmol) were heated under reflux in THF (40 mL) for 16 hours. The initially yellow solution darkened quickly to an orange colour, with this transformation clearly visible after 1 hour. The eventually red/pink mixture was cooled and solvent was removed under reduced pressure to give a crude orange residue. The residue was purified by flash column chromatography (silica gel, N<sub>2</sub>, CH<sub>2</sub>Cl<sub>2</sub>/THF gradient elution) whereby a bright pink band was eluted with 2% THF/CH<sub>2</sub>Cl<sub>2</sub>. Concentration of this pink band under reduced pressure resulted in a pink foam which was ultrasonically triturated with *n*-pentane to provide a crystalline solid. This was collected *via* vacuum filtration and washed with *n*-pentane (3 × 10 mL) before drying *in vacuo* for 16 hours. The title compound was obtained as a pink crystalline powder. Yield 1.260 g (1.450 mmol,



78%). Crystals suitable for single-crystal x-ray diffraction were grown from the liquid-liquid diffusion of *n*-hexane into a THF solution of the compound at ambient temperature inside an argon glovebox for two weeks.

IR (CH<sub>2</sub>Cl<sub>2</sub>, cm<sup>-1</sup>): 2039 vs ν<sub>CO</sub>, 1965 vs ν<sub>CO</sub>. IR (ATR, cm<sup>-1</sup>): 2561 w ν<sub>BH</sub>, 2026 vs ν<sub>CO</sub>, 1944 vs ν<sub>CO</sub>, 832 vs ν<sub>PF<sub>6</sub></sub>. UV-Vis [2.851(3)×10<sup>-4</sup> mol L<sup>-1</sup>, nm(ε, Lmol<sup>-1</sup>cm<sup>-1</sup>), CH<sub>2</sub>Cl<sub>2</sub>]: λ<sub>max</sub> = 267 (25820), 525 (379). <sup>1</sup>H NMR (400 MHz, CDCl<sub>3</sub>, 25 °C): δ<sub>H</sub> = 7.86 (m, 3 H, C<sub>6</sub>H<sub>5</sub>), 7.71 (m, 12 H, C<sub>6</sub>H<sub>5</sub>), 5.92 (s, 2 H, pzCH), 5.78 (s, 1 H, pzCH), 2.42 (s, 6 H, pzCH<sub>3</sub>), 2.32 (s, 3 H, pzCH<sub>3</sub>), 2.28 (s, 3 H, pzCH<sub>3</sub>), 2.00 (s, 6 H, pzCH<sub>3</sub>). <sup>13</sup>C{<sup>1</sup>H} NMR (176 MHz, CDCl<sub>3</sub>, 25 °C): δ<sub>C</sub> = 251.0 (d, <sup>1</sup>J<sub>CP</sub> = 21 Hz, Mo≡CP), 225.5 (d, <sup>2</sup>J<sub>CP</sub> = 4 Hz, CO), 152.0, 150.7 [C<sup>5</sup>(pz)], 146.8, 146.3 [C<sup>3</sup>(pz)], 135.5 [d, <sup>4</sup>J<sub>CP</sub> = 3 Hz, C<sup>4</sup>(C<sub>6</sub>H<sub>5</sub>)], 133.7 [d, <sup>2</sup>J<sub>CP</sub> = 11 Hz, C<sup>2,6</sup>(C<sub>6</sub>H<sub>5</sub>)], 135.5 [d, <sup>3</sup>J<sub>CP</sub> = 14 Hz, C<sup>3,5</sup>(C<sub>6</sub>H<sub>5</sub>)], 119.9 [d, <sup>1</sup>J<sub>CP</sub> = 90 Hz, C<sup>1</sup>(C<sub>6</sub>H<sub>5</sub>)], 107.8, 107.4 [C<sup>4</sup>(pz)], 16.1, 14.9, 13.0, 12.9 (pzCH<sub>3</sub>). <sup>31</sup>P{<sup>1</sup>H} NMR (162 MHz, CDCl<sub>3</sub>, 25 °C): δ<sub>P</sub> = -0.88 (s, PPh<sub>3</sub>), -144.4 (hept, <sup>1</sup>J<sub>PF</sub> = 706 Hz, PF<sub>6</sub>). MS (ESI, +ve ion, *m/z*): Found: 725.1859. Calcd for C<sub>36</sub>H<sub>36</sub><sup>11</sup>B<sup>98</sup>MoN<sub>6</sub>O<sub>2</sub>P [M]<sup>+</sup>: 725.18573. Anal. Found: C, 49.79; H, 4.37; N, 9.68%. Calcd for C<sub>36</sub>H<sub>37</sub>BF<sub>6</sub>MoN<sub>6</sub>O<sub>2</sub>P<sub>2</sub>: C, 49.79; H, 4.29; N, 9.68%.

*Crystal data for C<sub>36</sub>H<sub>37</sub>BMoN<sub>6</sub>O<sub>2</sub>P·F<sub>6</sub>P·C<sub>4</sub>H<sub>8</sub>O*, *M<sub>w</sub>* = 940.51 gmol<sup>-1</sup>, monoclinic, *P*2<sub>1</sub>/*n*, *a* = 9.2673 (1) Å, *b* = 18.2717 (2) Å, *c* = 25.4905 (2) Å, β = 91.331 (1)°, *V* = 4315.12 (7) Å<sup>3</sup>, *Z* = 4, *D*<sub>calc</sub> = 1.448 Mg m<sup>-3</sup>, μ(Cu Kα) = 3.08 mm<sup>-1</sup>, *T* = 150.0(1) K, clear light pink needle, 0.28 × 0.11 × 0.04 mm, 8599 independent measured reflections (2θ<sub>max</sub> = 147.8), *R*<sub>1</sub> = 0.031, *wR*<sub>2</sub> = 0.081 for 7762 reflections [*I* > 2σ(*I*)], 542 parameters, 261 restraints. CDCC 2180156.

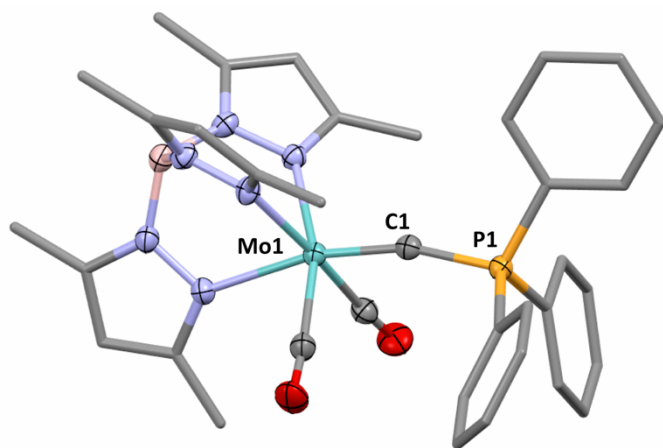

**Figure S2:** Molecular structure of the cation of **3a** in a crystal of **3a**·THF (50% displacement ellipsoids, pyrazolyl and phenyl rings simplified. Solvent, hydrogens and PF<sub>6</sub> anion omitted).

**Synthesis of [Mo(η<sup>2</sup>-SCPPH<sub>3</sub>)(CO)<sub>2</sub>(Tp\*)]PF<sub>6</sub> (**4a**).** A sample of [Mo(≡CPPH<sub>3</sub>)(CO)<sub>2</sub>(Tp\*)]PF<sub>6</sub> (**3a**: 0.100 g, 0.115 mmol) and elemental sulfur (0.037 g, 1.2 mg·atom) were heated in THF (10 mL) at 60 °C for 4 hours. The initially pink solution darkened quickly to a deep blue colour. The reaction mixture was cooled and solvent was removed under reduced pressure to give a crude blue residue. The residue was dissolved in minimal CHCl<sub>3</sub> (~2 mL), followed by dilution with Et<sub>2</sub>O to afford a dark solid which was ultrasonically trituated with

Et<sub>2</sub>O. The solid resulted was isolated by filtration followed by washing with minimal cold CHCl<sub>3</sub> (0.5 mL). Further washing with cold 40% CHCl<sub>3</sub>/Et<sub>2</sub>O provided a bright blue solid which was further washed with Et<sub>2</sub>O (2 × 10 mL) before drying *in vacuo* for 16 hours to give the title compound as a blue powder. Yield: 0.031 g (0.034 mmol, 30%).

IR (CH<sub>2</sub>Cl<sub>2</sub>, cm<sup>-1</sup>): 2016 vs ν<sub>CO</sub>, 1936 vs ν<sub>CO</sub>. IR (ATR, cm<sup>-1</sup>): 2569 w ν<sub>BH</sub>, 2002 vs ν<sub>CO</sub>, 1926 vs ν<sub>CO</sub>, 845 vs ν<sub>PF<sub>6</sub></sub>. UV-Vis [2.731(3)×10<sup>-5</sup> mol L<sup>-1</sup>, nm(ε, Lmol<sup>-1</sup>cm<sup>-1</sup>), CH<sub>2</sub>Cl<sub>2</sub>]: λ<sub>max</sub> = 261 (17160), 630 (1550). <sup>1</sup>H NMR (600 MHz, CD<sub>2</sub>Cl<sub>2</sub>, 25 °C): δ<sub>H</sub> = 7.95 (m, 3 H, C<sub>6</sub>H<sub>5</sub>), 7.87 (m, 6 H, C<sub>6</sub>H<sub>5</sub>), 7.77 (m, 6 H, C<sub>6</sub>H<sub>5</sub>), 5.95 (s, 1 H, pzCH), 5.92 (s, 2 H, pzCH), 2.42 (s, 6 H, pzCH<sub>3</sub>), 2.38 (s, 3 H, pzCH<sub>3</sub>), 2.25 (s, 3 H, pzCH<sub>3</sub>), 2.12 (s, 6 H, pzCH<sub>3</sub>). <sup>13</sup>C{<sup>1</sup>H} NMR (151 MHz, CD<sub>2</sub>Cl<sub>2</sub>, 25 °C): δ<sub>C</sub> = 235.5 (d, <sup>1</sup>J<sub>CP</sub> = 45 Hz, SCP), 227.0 (d, <sup>3</sup>J<sub>CP</sub> = 7 Hz, CO), 153.1 151.9 [C<sup>5</sup>(pz)], 147.3 146.4 [C<sup>3</sup>(pz)], 136.4 [d, <sup>4</sup>J<sub>CP</sub> = 3 Hz, C<sup>4</sup>(C<sub>6</sub>H<sub>5</sub>)], 134.7 [d, <sup>2</sup>J<sub>CP</sub> = 10 Hz, C<sup>2,6</sup>(C<sub>6</sub>H<sub>5</sub>)], 131.0 [d, <sup>3</sup>J<sub>CP</sub> = 14 Hz, C<sup>3,5</sup>(C<sub>6</sub>H<sub>5</sub>)], 118.6 [d, <sup>1</sup>J<sub>CP</sub> = 90 Hz, C<sup>1</sup>(C<sub>6</sub>H<sub>5</sub>)], 108.6 107.8 [C<sup>4</sup>(pz)], 15.8 14.3 13.4 12.8 [pzCH<sub>3</sub>]. <sup>31</sup>P{<sup>1</sup>H} NMR (162 MHz, CD<sub>2</sub>Cl<sub>2</sub>, 25 °C): δ<sub>P</sub> = 20.95 (s, PPh<sub>3</sub>), -144.5 (hept, <sup>1</sup>J<sub>PF</sub> = 706 Hz, PF<sub>6</sub>). MS (ESI, *m/z*): Found: 757.1589. Calcd for C<sub>36</sub>H<sub>37</sub><sup>11</sup>B<sup>98</sup>MoN<sub>6</sub>O<sub>2</sub>P<sup>32</sup>S [M]<sup>+</sup>: 757.15780. Single crystals suitable for x-ray diffraction were not successfully obtained.

## Notes and references

- 1 T. Desmond, F. J. Lalor, G. Ferguson and M. Parvez, *J. Chem. Soc., Chem. Commun.*, 1984, 75–77.
- 2 G. M. Jamison, P. S. White and J. L. Templeton, *Organometallics*, 1991, **10**, 1954–1959.
- 3 B. J. Frogley and A. F. Hill, *Dalton Trans.*, 2022, **51**, 1907–1917.
- 4 *CrysAlisPRO, Oxford Diffraction*, Agilent Technologies UK Ltd, Yarnton, England.
- 5 (a) G. Sheldrick, *Acta Crystallogr., Sect A: Found Crystallogr.*, 2008, **64**, 112–122; (b) G. M. Sheldrick, *Acta Crystallogr., Sect C: Cryst. Struct. Commun.*, 2015, **71**, 3–8.
- 6 (a) C. F. Macrae, P. R. Edgington, P. McCabe, E. Pidcock, G. P. Shields, R. Taylor, M. Towler and J. van de Streek, *J. Appl. Crystallogr.*, 2006, **39**, 453–457; (b) C. F. Macrae, I. J. Bruno, J. A. Chisholm, P. R. Edgington, P. McCabe, E. Pidcock, L. Rodriguez-Monge, R. Taylor, J. van de Streek and P. A. Wood, *J. Appl. Crystallogr.*, 2008, **41**, 466–470.
- 7 *Spartan20*®, Wavefunction, Inc., 18401 Von Karman Ave., Suite 370, Irvine, CA 92612 U.S.A., 2020
- 8 (a) J.-D. Chai and M. Head-Gordon, *J. Chem. Phys.*, 2008, **128**, 0841061–18410615; (b) J.-D. Chai and M. Head-Gordon, *Phys. Chem. Chem. Phys.*, 2014, **16**, 9904–9924. (c) N. Mardirossian and M. Head-Gordon, *Phys. Chem. Chem. Phys.*, 2008, **10**, 6615–6620
- 9 (a) P. J. Hay and W. R. Wadt, *J. Chem. Phys.*, 1985, **82**, 270–283; (b) W. R. Wadt and P. J. Hay, *J. Chem. Phys.*, 1985, **82**, 284–298; (c) P. J. Hay and W. R. Wadt, *J. Chem. Phys.*, 1985, **82**, 299–310.
- 10 W. J. Hehre, R. Ditchfeld and J. A. Pople, *J. Chem. Phys.*, 1972, **56**, 2257–2261.

## Computational Details

Results for  $\text{Me}_3\text{P}=\text{C}=\text{E}$  ( $\text{E} = \text{O}, \text{S}, \text{Se}, \text{Te}$ ) are provided for information only and do NOT constitute valid local minima due to, in each case, the retention of a single imaginary frequency. This corresponds to oscillation of the carbon atom perpendicular to the phosphorus-chalcogen vector.

### 1. $\text{Me}_3\text{P}=\text{C}=\text{O}$

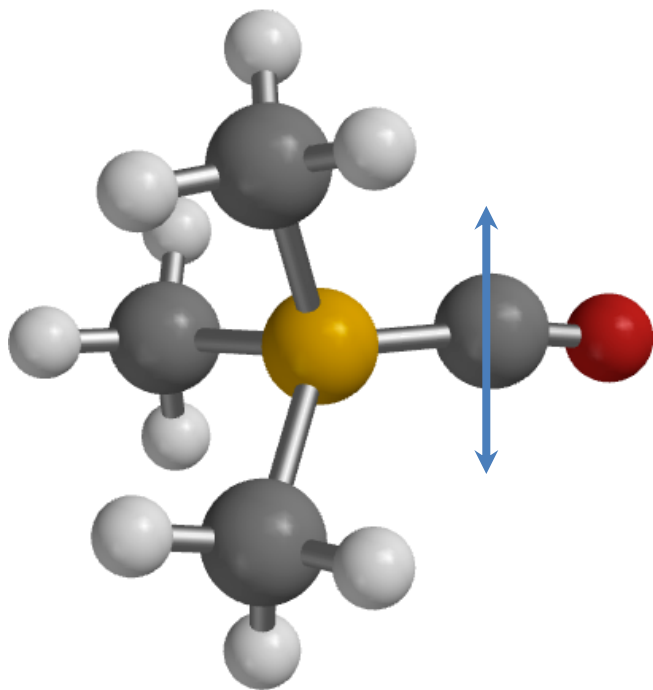

Figure S3: Optimised structure of  $\text{Me}_3\text{P}=\text{C}=\text{O}$  (DFT:  $\omega\text{B97X-V}$ , 6-31G\*). NB: imaginary frequency ( $i727\text{ cm}^{-1}$ ) with oscillation shown (blue arrow).

#### Cartesian Coordinates

| Atom | x         | y         | z         |
|------|-----------|-----------|-----------|
| P    | 0.013704  | -0.000001 | -0.425383 |
| C    | -1.689744 | -0.000001 | 0.225094  |
| H    | -2.225304 | 0.893247  | -0.099582 |
| H    | -1.622974 | 0.000001  | 1.316833  |
| H    | -2.225303 | -0.893249 | -0.099580 |
| C    | 0.878429  | 1.414575  | 0.435469  |
| H    | 0.329085  | 2.334437  | 0.219169  |
| H    | 1.891406  | 1.514852  | 0.032222  |
| H    | 0.948201  | 1.259448  | 1.519069  |
| C    | 0.878429  | -1.414576 | 0.435470  |
| H    | 1.891406  | -1.514853 | 0.032222  |
| H    | 0.329084  | -2.334438 | 0.219172  |
| H    | 0.948202  | -1.259448 | 1.519070  |
| C    | -0.115839 | 0.000003  | -2.059616 |
| O    | -0.228782 | 0.000002  | -3.269629 |

### Thermodynamic Properties at 298.15 K

|                          |             |         |                                                |
|--------------------------|-------------|---------|------------------------------------------------|
| Zero Point Energy :      | 300.16      | kJ/mol  | (ZPE)                                          |
| Temperature Correction : | 24.43       | kJ/mol  | (vibration + gas law + rotation + translation) |
| Enthalpy Correction :    | 324.59      | kJ/mol  | (ZPE + temperature correction)                 |
| Enthalpy :               | -574.063548 | au      | (Electronic Energy + Enthalpy Correction)      |
| Entropy :                | 369.12      | J/mol•K |                                                |
| Gibbs Energy :           | -574.105465 | au      | (Enthalpy - T*Entropy)                         |
| $C_p$ :                  | 120.08      | J/mol•K |                                                |

### 2. $\text{Me}_3\text{P}=\text{C}=\text{S}$

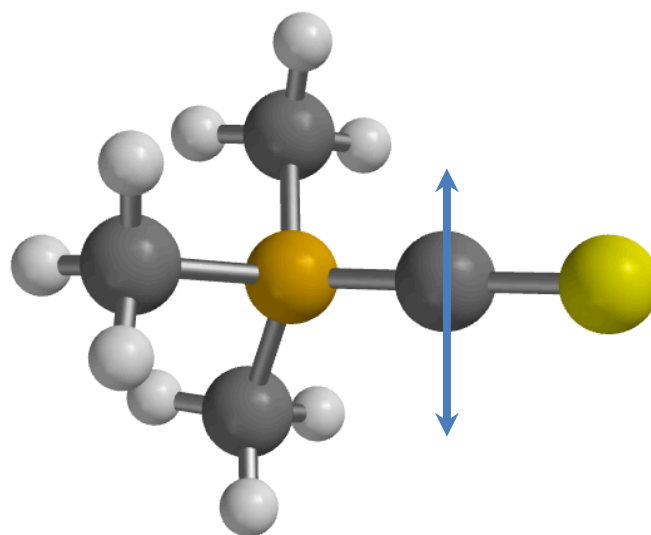

Figure S4: Optimised structure of  $\text{Me}_3\text{P}=\text{C}=\text{S}$  (DFT:  $\omega\text{B97X-V}$ , 6-31G\*). NB: imaginary frequency ( $i440\text{ cm}^{-1}$ ) with oscillation shown (blue arrow).

#### Cartesian Coordinates

| Atom | x         | y         | z         |
|------|-----------|-----------|-----------|
| P    | 0.020845  | 0.000000  | -0.375249 |
| C    | -1.678880 | -0.000000 | 0.282097  |
| H    | -2.210314 | 0.892083  | -0.061597 |
| H    | -1.639872 | 0.000000  | 1.377432  |
| H    | -2.210314 | -0.892083 | -0.061597 |
| C    | 0.869053  | 1.419980  | 0.444037  |
| H    | 0.340143  | 2.343327  | 0.185500  |
| H    | 1.895473  | 1.495782  | 0.065827  |
| H    | 0.904500  | 1.301054  | 1.534940  |
| C    | 0.869053  | -1.419980 | 0.444037  |
| H    | 1.895473  | -1.495782 | 0.065826  |
| H    | 0.340142  | -2.343327 | 0.185501  |
| H    | 0.904501  | -1.301053 | 1.534940  |
| C    | -0.088424 | 0.000000  | -2.013924 |
| S    | -0.211378 | 0.000000  | -3.607771 |

## Thermodynamic Properties at 298.15 K

|                          |             |         |                                                |
|--------------------------|-------------|---------|------------------------------------------------|
| Zero Point Energy :      | 317.35      | kJ/mol  | (ZPE)                                          |
| Temperature Correction : | 24.04       | kJ/mol  | (vibration + gas law + rotation + translation) |
| Enthalpy Correction :    | 341.39      | kJ/mol  | (ZPE + temperature correction)                 |
| Enthalpy :               | -896.948792 | au      | (Electronic Energy + Enthalpy Correction)      |
| Entropy :                | 372.04      | J/mol•K |                                                |
| Gibbs Energy :           | -896.991041 | au      | (Enthalpy - T*Entropy)                         |
| C <sub>v</sub> :         | 123.47      | J/mol•K |                                                |

## Thermodynamic Properties at 298.15 K

|                          |              |         |                                                |
|--------------------------|--------------|---------|------------------------------------------------|
| Zero Point Energy :      | 316.09       | kJ/mol  | (ZPE)                                          |
| Temperature Correction : | 24.32        | kJ/mol  | (vibration + gas law + rotation + translation) |
| Enthalpy Correction :    | 340.41       | kJ/mol  | (ZPE + temperature correction)                 |
| Enthalpy :               | -2899.877429 | au      | (Electronic Energy + Enthalpy Correction)      |
| Entropy :                | 382.06       | J/mol•K |                                                |
| Gibbs Energy :           | -2899.920815 | au      | (Enthalpy - T*Entropy)                         |
| C <sub>v</sub> :         | 124.62       | J/mol•K |                                                |

3. Me<sub>3</sub>P=C=Se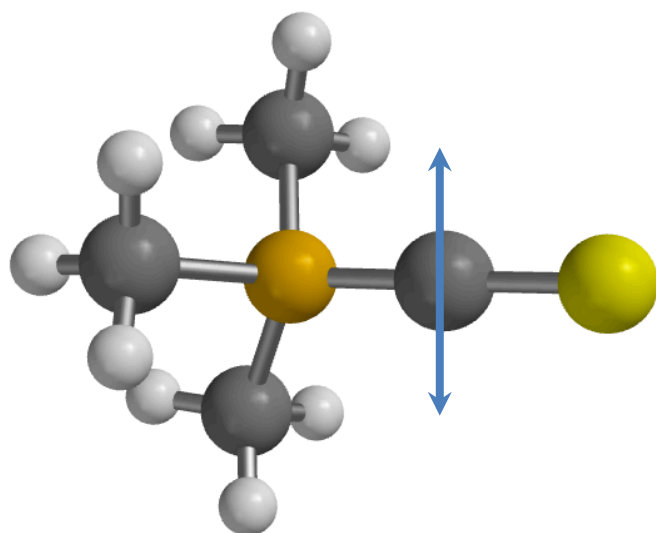

Figure S5: Optimised structure of Me<sub>3</sub>P=C=Se (DFT: ωB97X-V, 6-31G\*). Imaginary frequency (i392 cm<sup>-1</sup>) with oscillation (blue arrow).

## Cartesian Coordinate

| Atom | x         | y         | z         |
|------|-----------|-----------|-----------|
| P    | 0.026736  | 0.007585  | -0.364755 |
| C    | 0.862201  | 1.428922  | 0.472168  |
| H    | 1.894672  | 1.498798  | 0.107725  |
| H    | 0.879431  | 1.320753  | 1.564951  |
| H    | 0.342345  | 2.354137  | 0.198018  |
| C    | 0.867881  | -1.416146 | 0.437107  |
| H    | 1.897887  | -1.494170 | 0.069401  |
| H    | 0.334966  | -2.335050 | 0.171948  |
| H    | 0.893085  | -1.296267 | 1.528652  |
| C    | -1.675698 | 0.010990  | 0.287831  |
| H    | -2.202119 | -0.883535 | -0.056549 |
| H    | -2.208109 | 0.900149  | -0.063147 |
| H    | -1.642361 | 0.019183  | 1.383409  |
| C    | -0.073733 | -0.076613 | -2.005487 |
| Se   | -0.197107 | 0.003936  | -3.731178 |

4. Me<sub>3</sub>P=C=Te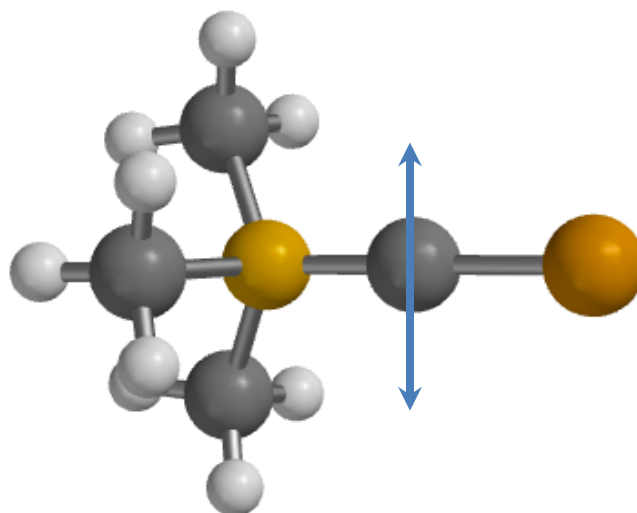

Figure S6: Optimised structure of Me<sub>3</sub>P=C=Te (DFT: ωB97X-V, 6-31G\*, LANL2Dζ(Te)). Imaginary frequency (i337 cm<sup>-1</sup>) with oscillation (blue arrow).

## Cartesian Coordinate

| Atom | x         | y         | z         |
|------|-----------|-----------|-----------|
| P    | 0.023171  | -0.007771 | -0.350371 |
| C    | -1.672687 | -0.012587 | 0.319696  |
| H    | -2.202488 | 0.881879  | -0.020167 |
| H    | -1.632880 | -0.022572 | 1.415265  |
| H    | -2.208127 | -0.900831 | -0.029385 |
| C    | 0.865129  | 1.416858  | 0.440303  |
| H    | 0.336152  | 2.335325  | 0.166748  |
| H    | 1.894367  | 1.488942  | 0.070222  |
| H    | 0.892189  | 1.310702  | 1.532746  |
| C    | 0.857787  | -1.429597 | 0.476591  |
| H    | 1.891840  | -1.494616 | 0.116987  |
| H    | 0.343600  | -2.355511 | 0.195279  |
| H    | 0.869540  | -1.329844 | 1.569665  |
| C    | -0.072173 | 0.073220  | -1.995429 |
| Te   | -0.185447 | 0.000686  | -3.908232 |

| Thermodynamic Properties at 298.15 K |             |         |                                                |
|--------------------------------------|-------------|---------|------------------------------------------------|
| Zero Point Energy :                  | 315.07      | kJ/mol  | (ZPE)                                          |
| Temperature Correction :             | 24.51       | kJ/mol  | (vibration + gas law + rotation + translation) |
| Enthalpy Correction :                | 339.58      | kJ/mol  | (ZPE + temperature correction)                 |
| Enthalpy :                           | -506.877546 | au      | (Electronic Energy + Enthalpy Correction)      |
| Entropy :                            | 388.83      | J/mol•K |                                                |
| Gibbs Energy :                       | -506.921701 | au      | (Enthalpy - T*Entropy)                         |
| C <sub>v</sub> :                     | 125.50      | J/mol•K |                                                |

5. (Me<sub>3</sub>P)<sub>2</sub>C=S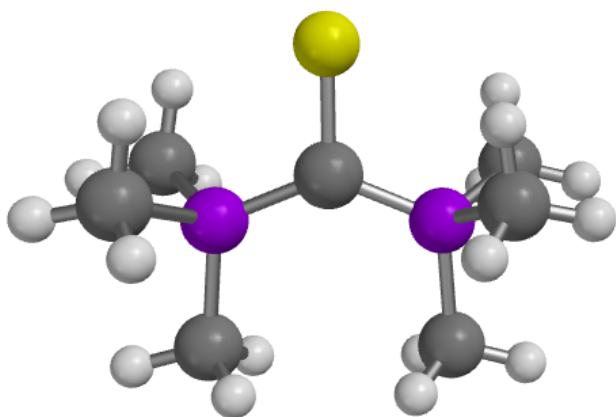Figure S7: Optimised structure of (Me<sub>3</sub>P)<sub>2</sub>C=S (DFT: ωB97X–V, 6–31G\*).

## Cartesian Coordinate

| Atom | x         | y         | z         |
|------|-----------|-----------|-----------|
| P    | 1.562380  | 0.000118  | -0.132434 |
| C    | 2.539218  | -1.443126 | -0.667705 |
| H    | 2.387159  | -1.544762 | -1.748070 |
| H    | 2.155592  | -2.342954 | -0.173271 |
| H    | 3.605790  | -1.322462 | -0.444303 |
| C    | 1.695254  | 0.000168  | 1.691533  |
| H    | 1.225550  | 0.893476  | 2.116287  |
| H    | 2.755424  | -0.000058 | 1.970953  |
| H    | 1.225237  | -0.893380 | 2.115254  |
| C    | 2.539262  | 1.443182  | -0.667812 |
| H    | 2.155696  | 2.343058  | -0.173431 |
| H    | 2.387214  | 1.544741  | -1.748184 |
| H    | 3.605825  | 1.322454  | -0.444403 |
| C    | 0.000013  | -0.000000 | -0.783249 |
| P    | -1.562341 | -0.000118 | -0.132375 |
| C    | -1.695273 | -0.000168 | 1.691629  |
| H    | -1.225326 | 0.893346  | 2.115523  |
| H    | -1.225638 | -0.893443 | 2.116556  |

| Atom | x         | y         | z         |
|------|-----------|-----------|-----------|
| H    | -2.755467 | 0.000058  | 1.970938  |
| C    | -2.539194 | 1.443122  | -0.667706 |
| H    | -2.155577 | 2.342960  | -0.173285 |
| H    | -3.605768 | 1.322453  | -0.444319 |
| H    | -2.387127 | 1.544745  | -1.748074 |
| C    | -2.539238 | -1.443178 | -0.667812 |
| H    | -2.387182 | -1.544724 | -1.748187 |
| H    | -3.605804 | -1.322445 | -0.444419 |
| H    | -2.155681 | -2.343064 | -0.173446 |
| S    | 0.000002  | 0.000000  | -2.606187 |

## Thermodynamic Properties at 298.15 K

|                          |              |         |                                                |
|--------------------------|--------------|---------|------------------------------------------------|
| Zero Point Energy :      | 593.29       | kJ/mol  | (ZPE)                                          |
| Temperature Correction : | 40.78        | kJ/mol  | (vibration + gas law + rotation + translation) |
| Enthalpy Correction :    | 634.08       | kJ/mol  | (ZPE + temperature correction)                 |
| Enthalpy :               | -1357.912450 | au      | (Electronic Energy + Enthalpy Correction)      |
| Entropy :                | 489.60       | J/mol•K |                                                |
| Gibbs Energy :           | -1357.968049 | au      | (Enthalpy - T*Entropy)                         |
| C <sub>v</sub> :         | 252.42       | J/mol•K |                                                |

6. Me<sub>3</sub>P=C=C=S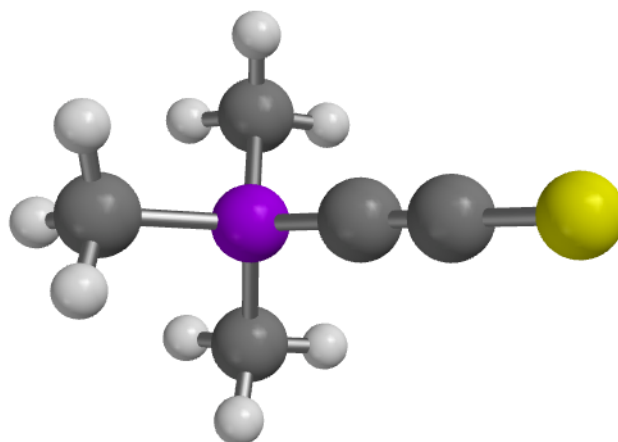Figure S8: Optimised structure of Me<sub>3</sub>P=C=C=S (DFT: ωB97X–V, 6–31G\*).

## Cartesian Coordinate

| Atom | x         | y         | z         |
|------|-----------|-----------|-----------|
| S    | -0.030247 | -0.357752 | 4.545282  |
| C    | -0.019679 | -0.219547 | 2.950146  |
| C    | -0.013063 | -0.109392 | 1.701695  |
| P    | -0.000499 | 0.000127  | 0.054295  |
| C    | -0.841601 | 1.489452  | -0.575341 |
| H    | -0.349916 | 2.379807  | -0.169626 |
| H    | -1.882492 | 1.485087  | -0.236203 |

| Atom | x         | y         | z         |
|------|-----------|-----------|-----------|
| H    | -0.814429 | 1.522906  | -1.671438 |
| C    | 1.677408  | 0.060689  | -0.655779 |
| H    | 1.639062  | 0.132215  | -1.749530 |
| H    | 2.223636  | -0.843625 | -0.367686 |
| H    | 2.208849  | 0.928695  | -0.251186 |
| C    | -0.821973 | -1.399837 | -0.774583 |
| H    | -0.321734 | -2.330324 | -0.490057 |
| H    | -0.788266 | -1.285912 | -1.864754 |
| H    | -1.865057 | -1.452591 | -0.445235 |

### Thermodynamic Properties at 298.15 K

|                          |             |         |                                                |
|--------------------------|-------------|---------|------------------------------------------------|
| Zero Point Energy :      | 335.18      | kJ/mol  | (ZPE)                                          |
| Temperature Correction : | 25.59       | kJ/mol  | (vibration + gas law + rotation + translation) |
| Enthalpy Correction :    | 360.78      | kJ/mol  | (ZPE + temperature correction)                 |
| Enthalpy :               | -935.100010 | au      | (Electronic Energy + Enthalpy Correction)      |
| Entropy :                | 384.79      | J/mol•K |                                                |
| Gibbs Energy :           | -935.143707 | au      | (Enthalpy - T*Entropy)                         |
| C <sub>v</sub> :         | 142.64      | J/mol•K |                                                |

### 7. [W(SCPMe<sub>3</sub>)(CO)<sub>2</sub>(Tp\*)]<sup>+</sup> (Gas Phase)

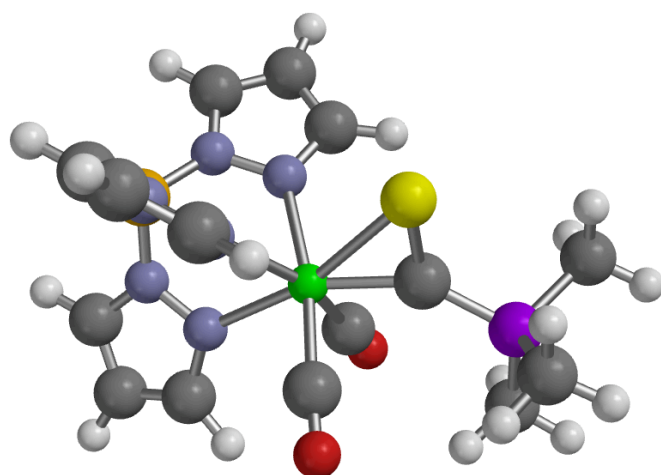

Figure S9: Optimised structure of the cation [W(SCPMe<sub>3</sub>)(CO)<sub>2</sub>(Tp\*)]<sup>+</sup> [DFT: ωB97X-D/6-31G\*/LANL2DZ/gas phase].

### Cartesian Coordinates

| Atom | x         | y         | z         |
|------|-----------|-----------|-----------|
| W    | 0.140660  | -0.052217 | -0.204197 |
| P    | -0.448678 | 3.158675  | -1.669927 |
| S    | 1.139509  | 2.143751  | 0.712769  |
| C    | 1.109393  | -0.072422 | -1.931323 |
| N    | -0.348574 | -2.167440 | -0.554208 |
| N    | 1.836696  | -1.009616 | 0.785852  |
| C    | 0.001392  | 1.851629  | -0.558523 |
| N    | -0.763126 | -0.331873 | 1.776251  |

| Atom | x         | y         | z         |
|------|-----------|-----------|-----------|
| N    | -0.316623 | -3.042176 | 0.481069  |
| O    | -2.820524 | -0.007106 | -1.459539 |
| N    | -0.626889 | -1.495422 | 2.451356  |
| N    | 1.661753  | -2.057354 | 1.626645  |
| O    | 1.688588  | -0.041715 | -2.990028 |
| C    | -1.656378 | -0.007826 | -1.012570 |
| C    | -0.734327 | -2.852107 | -1.642681 |
| C    | -0.958162 | -4.187901 | -1.313385 |
| H    | -1.273634 | -4.989105 | -1.967443 |
| C    | 2.852587  | -2.444326 | 2.114798  |
| C    | -1.266268 | -1.408868 | 3.633552  |
| C    | -1.841569 | -0.151657 | 3.733640  |
| H    | -2.422935 | 0.245775  | 4.554263  |
| C    | -0.671519 | -4.261042 | 0.044415  |
| C    | -1.493335 | 0.488082  | 2.539101  |
| C    | 3.839533  | -1.625722 | 1.582269  |
| H    | 4.903828  | -1.666237 | 1.769506  |
| C    | 3.149316  | -0.742331 | 0.750180  |
| B    | 0.244744  | -2.628183 | 1.873425  |
| H    | 0.274842  | -3.575067 | 2.611598  |
| C    | -1.184039 | 4.513731  | -0.723763 |
| H    | -2.115170 | 4.173582  | -0.257202 |
| H    | -1.397466 | 5.365071  | -1.379782 |
| H    | -0.484906 | 4.819563  | 0.062085  |
| C    | 1.065928  | 3.734483  | -2.476391 |
| H    | 1.484839  | 2.923705  | -3.083946 |
| H    | 1.795737  | 4.014281  | -1.709452 |
| H    | 0.851024  | 4.595548  | -3.119408 |
| C    | -1.607824 | 2.627659  | -2.953704 |
| H    | -2.580882 | 2.375773  | -2.520867 |
| H    | -1.205757 | 1.752888  | -3.477357 |
| H    | -1.743538 | 3.440706  | -3.676972 |
| H    | -1.711692 | 1.492869  | 2.197443  |
| H    | -1.267508 | -2.249472 | 4.316242  |
| H    | 3.517816  | 0.074719  | 0.141125  |
| H    | 2.914452  | -3.276784 | 2.804942  |
| H    | -0.693887 | -5.099305 | 0.729806  |
| H    | -0.828105 | -2.348983 | -2.597826 |

### Thermodynamic Properties at 298.15 K

|                          |              |         |                                                |
|--------------------------|--------------|---------|------------------------------------------------|
| Zero Point Energy :      | 913.66       | kJ/mol  | (ZPE)                                          |
| Temperature Correction : | 61.100       | kJ/mol  | (vibration + gas law + rotation + translation) |
| Enthalpy Correction :    | 975.66       | kJ/mol  | (ZPE + temperature correction)                 |
| Enthalpy :               | -1893.315816 | au      | (Electronic Energy + Enthalpy Correction)      |
| Entropy :                | 643.08       | J/mol•K |                                                |
| Gibbs Energy :           | -1893.388843 | au      | (Enthalpy - T*Entropy)                         |
| C <sub>v</sub> :         | 427.43       | J/mol•K |                                                |



## UV-Vis Allowed Transitions

| nm ▼   | strength | MO Component     |     |
|--------|----------|------------------|-----|
| 302.93 | 0.0206   | HOMO -> LUMO+2   | 84% |
| 336.80 | 0.0016   | HOMO-3 -> LUMO   | 67% |
| 360.69 | 0.0071   | HOMO-1 -> LUMO+1 | 77% |
| 451.70 | 0.0117   | HOMO-1 -> LUMO   | 43% |
|        |          | HOMO -> LUMO+1   | 41% |
| 455.68 | 0.0233   | HOMO -> LUMO+1   | 39% |
|        |          | HOMO-1 -> LUMO   | 35% |
| 607.20 | 0.0258   | HOMO -> LUMO     | 82% |

8.  $[W(ScPMe_3)(CO)_2(Tp^*)]^+$  -PCM  $\kappa = 7.43$  (THF)

Geometry not visually different to that in Figure S8.

## Cartesian Coordinates

| Atom | x         | y         | z         |
|------|-----------|-----------|-----------|
| W    | 0.220392  | -0.013805 | 0.095220  |
| S    | -0.834715 | 1.184813  | 2.145245  |
| P    | 0.735354  | 3.468403  | 0.786702  |
| O    | 0.222869  | 1.692472  | -2.563805 |
| O    | 3.296398  | 0.231465  | 0.735238  |
| N    | 0.833641  | -1.498545 | -1.418863 |
| N    | 0.128874  | -2.650555 | -1.547686 |
| N    | -1.828140 | -0.640229 | -0.449804 |
| N    | -2.123238 | -1.935121 | -0.704079 |
| N    | 0.109040  | -1.839151 | 1.318800  |
| N    | -0.468669 | -2.968322 | 0.848966  |
| C    | 0.161685  | 1.775745  | 0.870242  |
| C    | 0.264290  | 1.096020  | -1.580965 |
| C    | 2.168398  | 0.154666  | 0.501746  |
| C    | 1.810835  | -1.523480 | -2.334280 |
| C    | 1.741182  | -2.703030 | -3.070930 |
| H    | 2.386651  | -3.016648 | -3.876557 |
| C    | 0.664376  | -3.389467 | -2.531255 |
| C    | -2.947473 | 0.065858  | -0.630140 |
| C    | -3.991091 | -0.783371 | -1.004816 |
| H    | -5.013962 | -0.516695 | -1.221540 |
| C    | -3.420475 | -2.045028 | -1.039176 |
| C    | 0.542572  | -2.101120 | 2.556793  |
| C    | 0.234628  | -3.417217 | 2.901086  |
| H    | 0.447858  | -3.924904 | 3.829003  |
| C    | -0.402074 | -3.930589 | 1.782056  |
| B    | -1.031968 | -3.011470 | -0.586392 |
| H    | -1.468284 | -4.096501 | -0.848628 |
| H    | -2.942252 | 1.136656  | -0.480428 |
| H    | 1.041936  | -1.331639 | 3.128371  |
| H    | -3.841797 | -3.010372 | -1.279443 |
| H    | -0.808221 | -4.911870 | 1.583968  |

| Atom | x         | y         | z         |
|------|-----------|-----------|-----------|
| H    | 2.503586  | -0.697185 | -2.411700 |
| H    | 0.244810  | -4.354820 | -2.774285 |
| C    | -0.645643 | 4.499014  | 0.256112  |
| H    | -0.324089 | 5.544270  | 0.245708  |
| H    | -1.475899 | 4.373518  | 0.955621  |
| H    | -0.956778 | 4.197605  | -0.747347 |
| C    | 1.284213  | 3.971149  | 2.429863  |
| H    | 2.090471  | 3.309957  | 2.757963  |
| H    | 0.446484  | 3.907579  | 3.128068  |
| H    | 1.647451  | 5.001146  | 2.377267  |
| C    | 2.113111  | 3.639578  | -0.363390 |
| H    | 2.928631  | 2.977302  | -0.063335 |
| H    | 2.456871  | 4.677328  | -0.323307 |
| H    | 1.798158  | 3.406591  | -1.381887 |

## Thermodynamic Properties at 298.15 K

|                          |              |         |                                                |
|--------------------------|--------------|---------|------------------------------------------------|
| Zero Point Energy :      | 862.53       | kJ/mol  | (ZPE)                                          |
| Temperature Correction : | 64.25        | kJ/mol  | (vibration + gas law + rotation + translation) |
| Enthalpy Correction :    | 926.78       | kJ/mol  | (ZPE + temperature correction)                 |
| Enthalpy :               | -1893.502872 | au      | (Electronic Energy + Enthalpy Correction)      |
| Entropy :                | 654.75       | J/mol•K |                                                |
| Gibbs Energy :           | -1893.577225 | au      | (Enthalpy - T*Entropy)                         |
| $C_v$ :                  | 446.38       | J/mol•K |                                                |

9.  $[W(CS)(PMe_3)(CO)_2(Tp^*)]^+$  -PCM  $\kappa = 7.43$  (THF)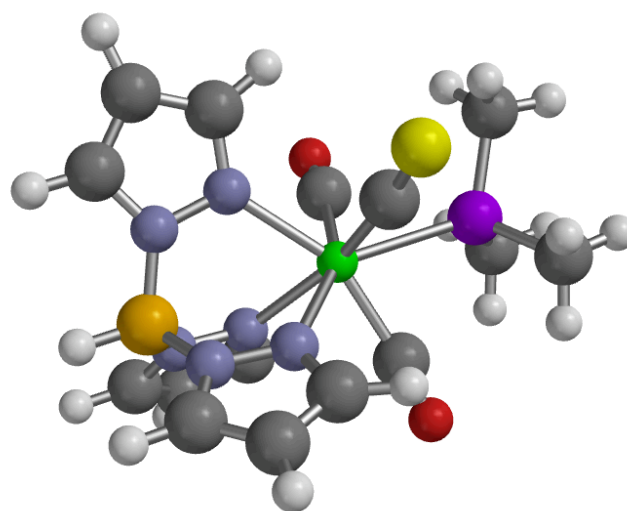

Figure S10: Optimised structure of the cation  $[W(CS)(PMe_3)(CO)_2(Tp^*)]^+$  [DFT:  $\omega$ B97X-D/6-31G\*/LANL2DZ/PCM  $\kappa = 7.43$  (THF)].

## Cartesian Coordinates

| Atom | x         | y         | z        |
|------|-----------|-----------|----------|
| W    | -0.228072 | 0.027033  | 0.303151 |
| C    | -1.376456 | -1.638563 | 0.269695 |

| Atom | x         | y         | z         |
|------|-----------|-----------|-----------|
| O    | -1.971262 | -2.611546 | 0.142414  |
| C    | 1.042161  | 0.036135  | 1.880710  |
| O    | 1.857281  | 0.039913  | 2.687958  |
| P    | -1.636571 | -0.003893 | 2.447072  |
| B    | 1.668698  | -0.014941 | -2.464675 |
| N    | 1.303307  | -1.454503 | -0.440507 |
| N    | 1.957788  | -1.260460 | -1.606838 |
| C    | 2.808213  | -2.277009 | -1.821933 |
| C    | 2.709361  | -3.166408 | -0.764125 |
| C    | 1.750039  | -2.604929 | 0.078166  |
| N    | -0.779723 | 0.000026  | -1.850348 |
| N    | 0.167246  | -0.014600 | -2.816262 |
| C    | -0.423216 | -0.010384 | -4.023097 |
| C    | -1.796119 | 0.005911  | -3.843940 |
| C    | -1.970167 | 0.013325  | -2.460049 |
| C    | -1.341639 | 1.630560  | 0.303237  |
| N    | 1.306084  | 1.454440  | -0.446193 |
| N    | 1.959724  | 1.234033  | -1.609661 |
| S    | -2.115207 | 2.961601  | 0.081330  |
| C    | 1.753794  | 2.613676  | 0.048752  |
| C    | 2.811153  | 2.246492  | -1.844160 |
| C    | 2.714909  | 3.156013  | -0.804402 |
| H    | 1.361143  | -2.963656 | 1.021165  |
| H    | -2.879209 | 0.030038  | -1.875481 |
| H    | 3.421853  | -2.294754 | -2.710927 |
| H    | 0.176825  | -0.018414 | -4.921381 |
| H    | 1.361972  | 2.992731  | 0.982147  |
| H    | 3.422866  | 2.246702  | -2.734591 |
| C    | -1.343265 | -1.455640 | 3.515304  |
| H    | -0.299088 | -1.484037 | 3.835889  |
| H    | -1.575134 | -2.376403 | 2.974454  |
| H    | -1.988123 | -1.384138 | 4.396552  |
| C    | -1.358695 | 1.413014  | 3.560138  |
| H    | -0.322105 | 1.422644  | 3.905184  |
| H    | -2.023241 | 1.312593  | 4.423549  |
| H    | -1.574005 | 2.350435  | 3.043627  |
| C    | -3.437531 | -0.030025 | 2.164772  |
| H    | -3.719016 | -0.933806 | 1.619089  |
| H    | -3.743596 | 0.845877  | 1.589329  |
| H    | -3.944027 | -0.023697 | 3.134513  |
| H    | 3.260516  | 4.078946  | -0.682012 |
| H    | -2.560813 | 0.012388  | -4.605255 |
| H    | 3.253146  | -4.087924 | -0.623966 |
| H    | 2.338203  | -0.014794 | -3.458396 |

## Thermodynamic Properties at 298.15 K

|                          |              |         |                                                |
|--------------------------|--------------|---------|------------------------------------------------|
| Zero Point Energy :      | 861.44       | kJ/mol  | (ZPE)                                          |
| Temperature Correction : | 64.74        | kJ/mol  | (vibration + gas law + rotation + translation) |
| Enthalpy Correction :    | 926.18       | kJ/mol  | (ZPE + temperature correction)                 |
| Enthalpy :               | -1893.491420 | au      | (Electronic Energy + Enthalpy Correction)      |
| Entropy :                | 656.48       | J/mol•K |                                                |
| Gibbs Energy :           | -1893.565970 | au      | (Enthalpy - T*Entropy)                         |
| C <sub>v</sub> :         | 449.06       | J/mol•K |                                                |

10. [W(PMe<sub>3</sub>)(CO)<sub>3</sub>(Tp\*)]<sup>+</sup> -PCM κ = 7.43 (THF)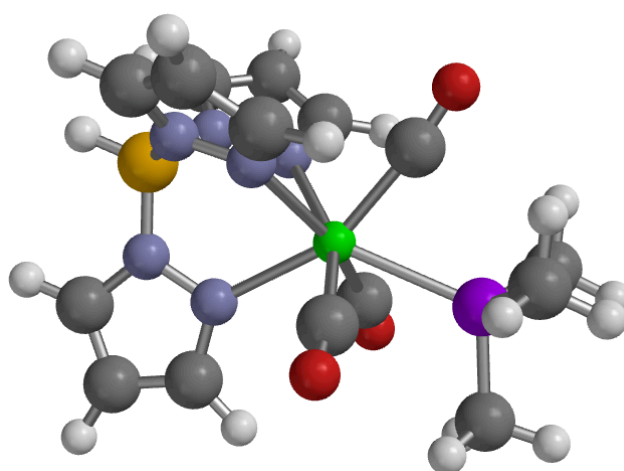

Figure S11: Optimised structure of the cation [W(PMe<sub>3</sub>)(CO)<sub>3</sub>(Tp\*)]<sup>+</sup> [DFT: ωB97X-D/6-31G\*/LANL2DZ/PCM κ = 7.43 (THF)].

## Cartesian Coordinates

| Atom | x         | y         | z         |
|------|-----------|-----------|-----------|
| W    | -0.214572 | -0.000118 | 0.306777  |
| C    | -1.349021 | -1.656822 | 0.290584  |
| O    | -1.941134 | -2.635358 | 0.172165  |
| C    | 1.038187  | 0.004996  | 1.878279  |
| O    | 1.851927  | 0.009293  | 2.690308  |
| P    | -1.633390 | -0.000370 | 2.440757  |
| B    | 1.656827  | 0.000651  | -2.461077 |
| N    | 1.301397  | -1.458011 | -0.436505 |
| N    | 1.946794  | -1.248506 | -1.605983 |
| C    | 2.800414  | -2.260109 | -1.835700 |
| C    | 2.714013  | -3.160304 | -0.786978 |
| C    | 1.757414  | -2.611374 | 0.066926  |
| N    | -0.788924 | -0.001273 | -1.845873 |
| N    | 0.155718  | 0.001614  | -2.813673 |
| C    | -0.436312 | 0.004237  | -4.019609 |
| C    | -1.809087 | 0.001613  | -3.838357 |
| C    | -1.980663 | -0.002992 | -2.454236 |
| C    | -1.355639 | 1.652020  | 0.285842  |
| N    | 1.299872  | 1.458965  | -0.437113 |
| N    | 1.948804  | 1.248665  | -1.604911 |



| Atom | x         | y         | z         |
|------|-----------|-----------|-----------|
| O    | -1.954150 | 2.626134  | 0.162486  |
| C    | 1.753468  | 2.612285  | 0.067129  |
| C    | 2.804632  | 2.259072  | -1.832333 |
| C    | 2.713288  | 3.159557  | -0.784172 |
| H    | 1.376323  | -2.980551 | 1.008674  |
| H    | -2.889134 | -0.005653 | -1.868272 |
| H    | 3.408236  | -2.266346 | -2.728870 |
| H    | 0.162285  | 0.006769  | -4.918949 |
| H    | 1.369393  | 2.982251  | 1.007537  |
| H    | 3.415140  | 2.264659  | -2.723647 |
| C    | -1.360504 | -1.438864 | 3.528838  |
| H    | -0.319033 | -1.470943 | 3.857564  |
| H    | -1.595931 | -2.364102 | 2.997477  |
| H    | -2.012516 | -1.349224 | 4.403010  |
| C    | -1.361162 | 1.438322  | 3.528613  |
| H    | -0.320049 | 1.470471  | 3.858343  |
| H    | -2.013467 | 1.348871  | 4.402596  |
| H    | -1.595905 | 2.363388  | 2.996642  |
| C    | -3.433048 | -0.000333 | 2.143377  |
| H    | -3.721227 | -0.890153 | 1.578460  |
| H    | -3.721791 | 0.889205  | 1.578424  |
| H    | -3.952287 | -0.000075 | 3.106477  |
| H    | 3.261697  | 4.079719  | -0.654007 |
| H    | -2.574476 | 0.002933  | -4.598902 |
| H    | 3.262641  | -4.080620 | -0.658920 |
| H    | 2.326655  | 0.000571  | -3.454445 |

## Thermodynamic Properties at 298.15 K

|                          |              |         |                                                |
|--------------------------|--------------|---------|------------------------------------------------|
| Zero Point Energy :      | 867.42       | kJ/mol  | (ZPE)                                          |
| Temperature Correction : | 64.19        | kJ/mol  | (vibration + gas law + rotation + translation) |
| Enthalpy Correction :    | 931.61       | kJ/mol  | (ZPE + temperature correction)                 |
| Enthalpy :               | -1570.556462 | au      | (Electronic Energy + Enthalpy Correction)      |
| Entropy :                | 652.01       | J/mol•K |                                                |
| Gibbs Energy :           | -1570.630505 | au      | (Enthalpy - T*Entropy)                         |
| C <sub>v</sub> :         | 445.93       | J/mol•K |                                                |

11. [W(OCPMe<sub>3</sub>)(CO)<sub>2</sub>(Tp\*)]<sup>+</sup> - PCM κ = 7.43 (THF)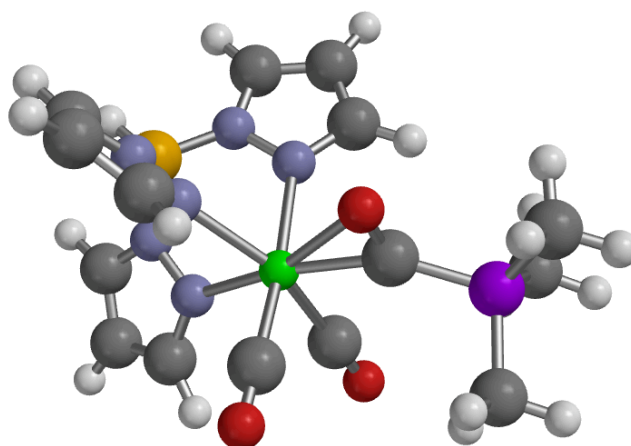

Figure S12: Optimised structure of the cation [W(OCPMe<sub>3</sub>)(CO)<sub>2</sub>(Tp\*)]<sup>+</sup> [DFT: ωB97X-D/6-31G\*/LANL2DZ/PCM κ = 7.43 (THF)].

## Cartesian Coordinates

| Atom | x         | y         | z         |
|------|-----------|-----------|-----------|
| W    | 0.672809  | -0.146047 | -0.024073 |
| O    | 0.190868  | 1.042529  | 1.852714  |
| P    | 0.480992  | 3.490980  | 0.766571  |
| O    | 1.207667  | 1.636606  | -2.602264 |
| O    | 3.748586  | -0.020401 | 0.496318  |
| N    | 0.791705  | -1.656776 | -1.603380 |
| N    | -0.113985 | -2.667100 | -1.643306 |
| N    | -1.550862 | -0.423166 | -0.237219 |
| N    | -2.070645 | -1.654245 | -0.442250 |
| N    | 0.459559  | -1.949589 | 1.196300  |
| N    | -0.358891 | -2.960432 | 0.819412  |
| C    | 0.372646  | 1.659258  | 0.775527  |
| C    | 1.000601  | 0.993265  | -1.670244 |
| C    | 2.600647  | -0.060383 | 0.298755  |
| C    | 1.651240  | -1.858822 | -2.610737 |
| C    | 1.298344  | -3.004306 | -3.320595 |
| H    | 1.792665  | -3.426728 | -4.181672 |
| C    | 0.180444  | -3.490294 | -2.661838 |
| C    | -2.580615 | 0.428114  | -0.209269 |
| C    | -3.784062 | -0.255998 | -0.395572 |
| H    | -4.781928 | 0.154257  | -0.422944 |
| C    | -3.408839 | -1.581041 | -0.540262 |
| C    | 1.036264  | -2.314708 | 2.347936  |
| C    | 0.581826  | -3.575823 | 2.730324  |
| H    | 0.855105  | -4.139771 | 3.608794  |
| C    | -0.298029 | -3.948246 | 1.724662  |
| B    | -1.145112 | -2.876168 | -0.508398 |
| H    | -1.772274 | -3.881177 | -0.695753 |
| H    | -2.411729 | 1.484339  | -0.059046 |
| H    | 1.738738  | -1.652454 | 2.833712  |
| H    | -3.994750 | -2.473150 | -0.708008 |
| H    | -0.879977 | -4.848511 | 1.589605  |
| H    | 2.473383  | -1.174960 | -2.767229 |
| H    | -0.418829 | -4.371659 | -2.838874 |
| C    | -0.651579 | 4.137740  | -0.474785 |

| Atom | x         | y        | z         |
|------|-----------|----------|-----------|
| H    | -0.530407 | 5.223949 | -0.518106 |
| H    | -1.679212 | 3.895109 | -0.193667 |
| H    | -0.419871 | 3.705338 | -1.450876 |
| C    | 0.054357  | 4.088359 | 2.408723  |
| H    | 0.745957  | 3.659428 | 3.137833  |
| H    | -0.968674 | 3.786869 | 2.646818  |
| H    | 0.132443  | 5.178891 | 2.419266  |
| C    | 2.184380  | 3.898071 | 0.344498  |
| H    | 2.856478  | 3.440747 | 1.074964  |
| H    | 2.299152  | 4.985620 | 0.363324  |
| H    | 2.413416  | 3.522488 | -0.655687 |

## Thermodynamic Properties at 298.15 K

|                          |              |         |                                                |
|--------------------------|--------------|---------|------------------------------------------------|
| Zero Point Energy :      | 867.74       | kJ/mol  | (ZPE)                                          |
| Temperature Correction : | 63.42        | kJ/mol  | (vibration + gas law + rotation + translation) |
| Enthalpy Correction :    | 931.16       | kJ/mol  | (ZPE + temperature correction)                 |
| Enthalpy :               | -1570.515823 | au      | (Electronic Energy + Enthalpy Correction)      |
| Entropy :                | 648.84       | J/mol•K |                                                |
| Gibbs Energy :           | -1570.589504 | au      | (Enthalpy - T*Entropy)                         |
| C <sub>v</sub> :         | 441.58       | J/mol•K |                                                |

12. [W(CSe)(PMe<sub>3</sub>)(CO)<sub>2</sub>(Tp\*)]<sup>+</sup> -PCM κ = 7.43 (THF)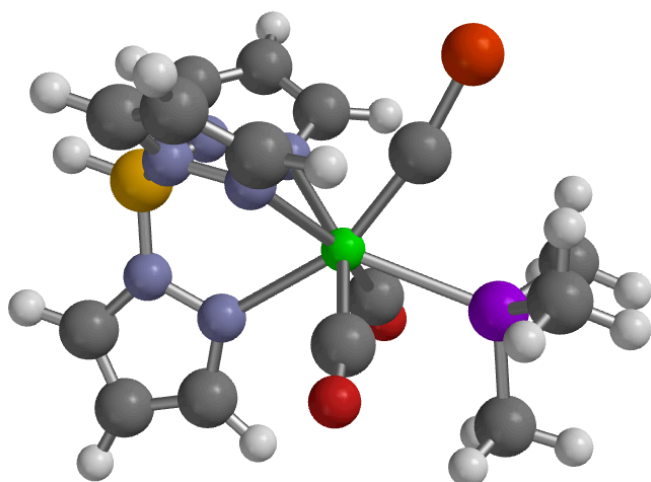

Figure S13: Optimised structure of the cation [W(CSe)(PMe<sub>3</sub>)(CO)<sub>2</sub>(Tp\*)]<sup>+</sup> [DFT: ωB97X-D/6-31G\*/LANL2DZ/PCM κ = 7.43 (THF)].

## Cartesian Coordinates

| Atom | x         | y         | z        |
|------|-----------|-----------|----------|
| W    | -0.235101 | 0.040087  | 0.299416 |
| C    | -1.388823 | -1.626904 | 0.257780 |
| O    | -1.984479 | -2.597899 | 0.125939 |
| C    | 1.041850  | 0.056133  | 1.876859 |
| O    | 1.858384  | 0.063283  | 2.681653 |

| Atom | x         | y         | z         |
|------|-----------|-----------|-----------|
| P    | -1.635650 | -0.011622 | 2.452588  |
| B    | 1.671987  | -0.021567 | -2.464568 |
| N    | 1.298093  | -1.451072 | -0.437700 |
| N    | 1.957258  | -1.264511 | -1.602304 |
| C    | 2.806993  | -2.283158 | -1.809130 |
| C    | 2.702974  | -3.166896 | -0.746893 |
| C    | 1.741418  | -2.599487 | 0.088736  |
| N    | -0.778282 | 0.003483  | -1.855227 |
| N    | 0.171145  | -0.019907 | -2.818532 |
| C    | -0.416499 | -0.015462 | -4.026749 |
| C    | -1.789733 | 0.009446  | -3.851376 |
| C    | -1.967159 | 0.022339  | -2.468005 |
| C    | -1.346097 | 1.632462  | 0.306993  |
| N    | 1.306115  | 1.457025  | -0.452284 |
| N    | 1.963392  | 1.229725  | -1.612420 |
| Se   | -2.184169 | 3.083875  | 0.054662  |
| C    | 1.753459  | 2.618310  | 0.038167  |
| C    | 2.816541  | 2.240177  | -1.849337 |
| C    | 2.717846  | 3.155182  | -0.814668 |
| H    | 1.348410  | -2.952894 | 1.032081  |
| H    | -2.877508 | 0.046950  | -1.885841 |
| H    | 3.423767  | -2.306472 | -2.695851 |
| H    | 0.185776  | -0.028573 | -4.923490 |
| H    | 1.358393  | 3.003003  | 0.967828  |
| H    | 3.431003  | 2.235245  | -2.737865 |
| C    | -1.328865 | -1.469646 | 3.508461  |
| H    | -0.282673 | -1.495267 | 3.822768  |
| H    | -1.559268 | -2.387573 | 2.962079  |
| H    | -1.968710 | -1.408337 | 4.394144  |
| C    | -1.356779 | 1.398910  | 3.572686  |
| H    | -0.321392 | 1.404223  | 3.921368  |
| H    | -2.024283 | 1.295404  | 4.433398  |
| H    | -1.568333 | 2.338622  | 3.058933  |
| C    | -3.436986 | -0.045885 | 2.177228  |
| H    | -3.717481 | -0.951873 | 1.634774  |
| H    | -3.747710 | 0.828070  | 1.601503  |
| H    | -3.938689 | -0.039884 | 3.149415  |
| H    | 3.264087  | 4.078121  | -0.695225 |
| H    | -2.552326 | 0.018089  | -4.614755 |
| H    | 3.245004  | -4.088389 | -0.599931 |
| H    | 2.343097  | -0.024886 | -3.457306 |

## Thermodynamic Properties at 298.15 K

|                          |              |         |                                                |
|--------------------------|--------------|---------|------------------------------------------------|
| Zero Point Energy :      | 859.70       | kJ/mol  | (ZPE)                                          |
| Temperature Correction : | 65.17        | kJ/mol  | (vibration + gas law + rotation + translation) |
| Enthalpy Correction :    | 924.86       | kJ/mol  | (ZPE + temperature correction)                 |
| Enthalpy :               | -3896.634478 | au      | (Electronic Energy + Enthalpy Correction)      |
| Entropy :                | 661.98       | J/mol•K |                                                |
| Gibbs Energy :           | -3896.709652 | au      | (Enthalpy - T*Entropy)                         |
| C <sub>v</sub> :         | 450.79       | J/mol•K |                                                |

13.  $[\text{W}(\text{SeCPMe}_3)(\text{CO})_2(\text{Tp}^*)]^+$  -PCM  $\kappa = 7.43$  (THF)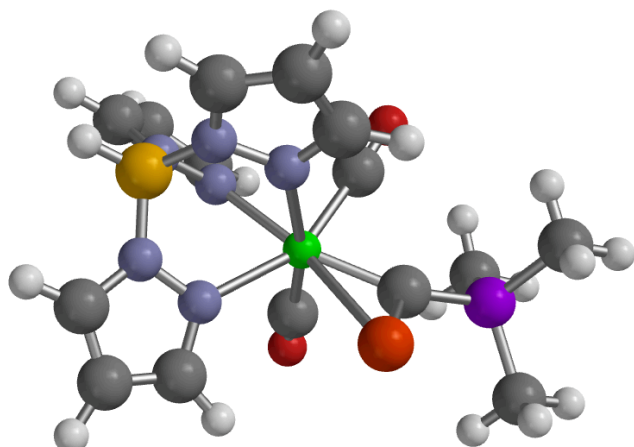

Figure S14: Optimised structure of the cation  $[\text{W}(\text{SeCPMe}_3)(\text{CO})_2(\text{Tp}^*)]^+$  [DFT:  $\omega\text{B97X-D/6-31G}^*/\text{LANL2DZ}/\text{PCM } \kappa = 7.43$  (THF)].

## Cartesian Coordinates

| Atom | x         | y         | z         |
|------|-----------|-----------|-----------|
| W    | 0.232594  | -0.022942 | 0.143452  |
| Se   | -0.859769 | 1.154125  | 2.322021  |
| P    | 0.724052  | 3.471938  | 0.766370  |
| O    | 0.266136  | 1.658681  | -2.531892 |
| O    | 3.308752  | 0.212773  | 0.806881  |
| N    | 0.837983  | -1.504332 | -1.385789 |
| N    | 0.118034  | -2.641829 | -1.544808 |
| N    | -1.818608 | -0.624602 | -0.419135 |
| N    | -2.126072 | -1.911091 | -0.695969 |
| N    | 0.117692  | -1.880908 | 1.327036  |
| N    | -0.480417 | -2.991880 | 0.838703  |
| C    | 0.178567  | 1.776570  | 0.885129  |
| C    | 0.301695  | 1.074096  | -1.542756 |
| C    | 2.184305  | 0.133428  | 0.563612  |
| C    | 1.823701  | -1.526014 | -2.292260 |
| C    | 1.745581  | -2.689788 | -3.051910 |
| H    | 2.393360  | -2.996467 | -3.858426 |
| C    | 0.651545  | -3.369291 | -2.538045 |
| C    | -2.929206 | 0.097390  | -0.595002 |
| C    | -3.980187 | -0.734216 | -0.987479 |
| H    | -4.999837 | -0.454122 | -1.203177 |
| C    | -3.421980 | -2.000487 | -1.041170 |
| C    | 0.570498  | -2.179253 | 2.550309  |
| C    | 0.254355  | -3.500110 | 2.866190  |
| H    | 0.479126  | -4.033747 | 3.776763  |
| C    | -0.407079 | -3.978285 | 1.745691  |
| B    | -1.049564 | -3.002799 | -0.593108 |
| H    | -1.499298 | -4.077850 | -0.873001 |
| H    | -2.912530 | 1.165219  | -0.426540 |
| H    | 1.087356  | -1.430537 | 3.133486  |
| H    | -3.852993 | -2.956955 | -1.299009 |
| H    | -0.828076 | -4.949563 | 1.529852  |
| H    | 2.526341  | -0.706393 | -2.349256 |
| H    | 0.216545  | -4.320921 | -2.806646 |

| Atom | x         | y        | z         |
|------|-----------|----------|-----------|
| C    | -0.671410 | 4.470292 | 0.206934  |
| H    | -0.362979 | 5.518875 | 0.171124  |
| H    | -1.501053 | 4.351447 | 0.908226  |
| H    | -0.976829 | 4.139676 | -0.788981 |
| C    | 1.269488  | 4.042843 | 2.387559  |
| H    | 2.068775  | 3.391370 | 2.750216  |
| H    | 0.429781  | 4.019904 | 3.085564  |
| H    | 1.642262  | 5.066166 | 2.288559  |
| C    | 2.101106  | 3.648538 | -0.387291 |
| H    | 2.923303  | 2.997131 | -0.081103 |
| H    | 2.434297  | 4.689998 | -0.356814 |
| H    | 1.790660  | 3.403921 | -1.404107 |

## Thermodynamic Properties at 298.15 K

|                          |              |         |                                                |
|--------------------------|--------------|---------|------------------------------------------------|
| Zero Point Energy :      | 861.28       | kJ/mol  | (ZPE)                                          |
| Temperature Correction : | 64.48        | kJ/mol  | (vibration + gas law + rotation + translation) |
| Enthalpy Correction :    | 925.75       | kJ/mol  | (ZPE + temperature correction)                 |
| Enthalpy :               | -3896.658855 | au      | (Electronic Energy + Enthalpy Correction)      |
| Entropy :                | 658.93       | J/mol•K |                                                |
| Gibbs Energy :           | -3896.733682 | au      | (Enthalpy - T*Entropy)                         |
| $C_v$ :                  | 448.06       | J/mol•K |                                                |

14.  $[\text{W}(\text{CTe})(\text{PMe}_3)(\text{CO})_2(\text{Tp}^*)]^+$  -PCM  $\kappa = 7.43$  (THF)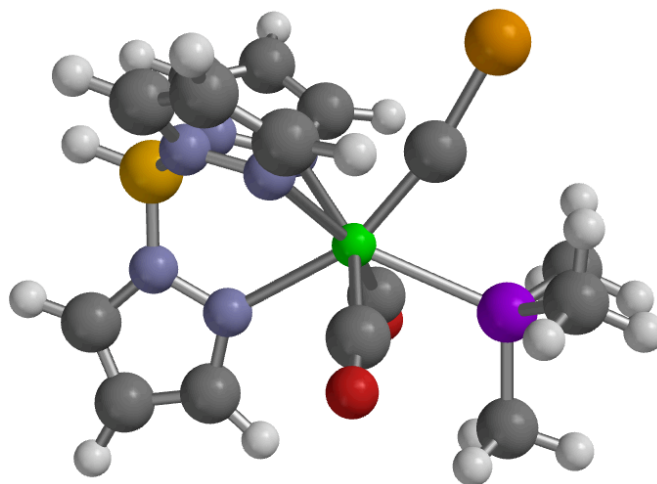

Figure S15: Optimised structure of the cation  $[\text{W}(\text{CTe})(\text{PMe}_3)(\text{CO})_2(\text{Tp}^*)]^+$  [DFT:  $\omega\text{B97X-D/6-31G}^*/\text{LANL2DZ}/\text{PCM } \kappa = 7.43$  (THF)].

## Cartesian Coordinates

| Atom | x         | y         | z        |
|------|-----------|-----------|----------|
| W    | -0.245535 | 0.058621  | 0.294868 |
| C    | -1.405510 | -1.613965 | 0.241509 |
| O    | -1.998168 | -2.584766 | 0.106755 |
| C    | 1.042666  | 0.085997  | 1.873668 |
| O    | 1.860926  | 0.098927  | 2.674687 |

| Atom | x         | y         | z         |
|------|-----------|-----------|-----------|
| P    | -1.633517 | -0.018648 | 2.459437  |
| B    | 1.676726  | -0.031847 | -2.462058 |
| N    | 1.291024  | -1.449471 | -0.432274 |
| N    | 1.953607  | -1.274014 | -1.595603 |
| C    | 2.800792  | -2.295479 | -1.793633 |
| C    | 2.692822  | -3.171739 | -0.725609 |
| C    | 1.730627  | -2.595846 | 0.103733  |
| N    | -0.776908 | 0.009555  | -1.860897 |
| N    | 0.176421  | -0.026515 | -2.820467 |
| C    | -0.406586 | -0.022701 | -4.030735 |
| C    | -1.780302 | 0.014050  | -3.860628 |
| C    | -1.963152 | 0.035229  | -2.478327 |
| C    | -1.349609 | 1.633049  | 0.316106  |
| N    | 1.307228  | 1.460065  | -0.458478 |
| N    | 1.973726  | 1.219745  | -1.611065 |
| Te   | -2.277092 | 3.268657  | 0.018040  |
| C    | 1.750291  | 2.626947  | 0.022605  |
| C    | 2.825459  | 2.229794  | -1.854343 |
| C    | 2.718661  | 3.155964  | -0.830298 |
| H    | 1.332713  | -2.941973 | 1.047837  |
| H    | -2.875372 | 0.071077  | -1.899619 |
| H    | 3.422106  | -2.325003 | -2.677008 |
| H    | 0.198863  | -0.043760 | -4.925094 |
| H    | 1.348020  | 3.021523  | 0.944985  |
| H    | 3.442486  | 2.218210  | -2.740985 |
| C    | -1.311392 | -1.487708 | 3.495896  |
| H    | -0.262745 | -1.511404 | 3.802400  |
| H    | -1.540005 | -2.400728 | 2.940473  |
| H    | -1.945061 | -1.441627 | 4.386932  |
| C    | -1.350928 | 1.379034  | 3.592664  |
| H    | -0.317303 | 1.376435  | 3.946488  |
| H    | -2.022137 | 1.268509  | 4.449557  |
| H    | -1.556611 | 2.324516  | 3.087207  |
| C    | -3.434651 | -0.064086 | 2.189829  |
| H    | -3.712901 | -0.973291 | 1.651554  |
| H    | -3.752880 | 0.806831  | 1.613715  |
| H    | -3.930455 | -0.059064 | 3.164980  |
| H    | 3.262428  | 4.081143  | -0.717713 |
| H    | -2.540085 | 0.024861  | -4.626680 |
| H    | 3.231535  | -4.093936 | -0.571036 |
| H    | 2.349777  | -0.041168 | -3.453373 |

## Thermodynamic Properties at 298.15 K

|                          |              |         |                                                |
|--------------------------|--------------|---------|------------------------------------------------|
| Zero Point Energy :      | 858.03       | kJ/mol  | (ZPE)                                          |
| Temperature Correction : | 65.36        | kJ/mol  | (vibration + gas law + rotation + translation) |
| Enthalpy Correction :    | 923.39       | kJ/mol  | (ZPE + temperature correction)                 |
| Enthalpy :               | -1503.353367 | au      | (Electronic Energy + Enthalpy Correction)      |
| Entropy :                | 666.47       | J/mol•K |                                                |
| Gibbs Energy :           | -1503.429051 | au      | (Enthalpy - T*Entropy)                         |
| C <sub>v</sub> :         | 452.41       | J/mol•K |                                                |

15. [W(TeCPMe<sub>3</sub>)(CO)<sub>2</sub>(Tp\*)]<sup>+</sup> -PCM κ = 7.43 (THF)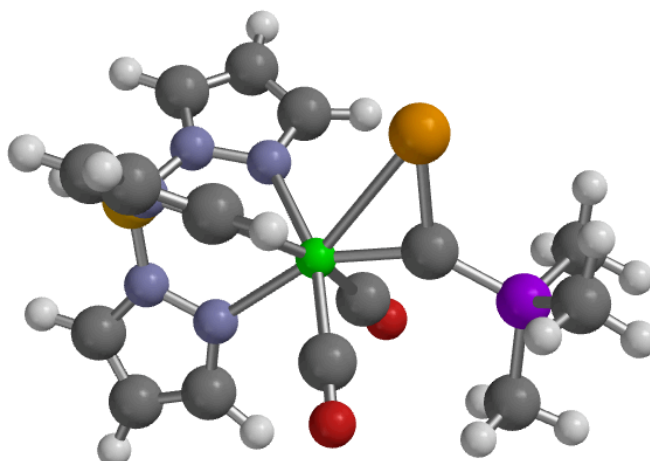

Figure S16: Optimised structure of the cation [W(TeCPMe<sub>3</sub>)(CO)<sub>2</sub>(Tp\*)]<sup>+</sup> [DFT: ωB97X-D/6-31G\*/LANL2DZ/PCM κ = 7.43 (THF)].

## Cartesian Coordinates

| Atom | x         | y         | z         |
|------|-----------|-----------|-----------|
| W    | 0.058614  | 0.035266  | 0.111607  |
| Te   | -1.322415 | 1.306055  | 2.364660  |
| P    | 0.808422  | 3.439167  | 0.816094  |
| O    | 0.001685  | 1.794080  | -2.508102 |
| O    | 3.155282  | 0.255790  | 0.675910  |
| N    | 0.749316  | -1.426436 | -1.400979 |
| N    | 0.135247  | -2.631478 | -1.509442 |
| N    | -1.926575 | -0.717268 | -0.499004 |
| N    | -2.153995 | -2.033321 | -0.706627 |
| N    | 0.046735  | -1.794667 | 1.345902  |
| N    | -0.467870 | -2.957377 | 0.883847  |
| C    | 0.089533  | 1.810019  | 0.910601  |
| C    | 0.052434  | 1.175485  | -1.539647 |
| C    | 2.025294  | 0.198131  | 0.463339  |
| C    | 1.709063  | -1.381949 | -2.335725 |
| C    | 1.722001  | -2.570535 | -3.059119 |
| H    | 2.375766  | -2.840226 | -3.874086 |
| C    | 0.708455  | -3.332994 | -2.497828 |
| C    | -3.065411 | -0.070843 | -0.769519 |
| C    | -4.050895 | -0.981583 | -1.152716 |
| H    | -5.072881 | -0.771755 | -1.428282 |
| C    | -3.424426 | -2.215999 | -1.101875 |
| C    | 0.517938  | -2.030974 | 2.575352  |
| C    | 0.300741  | -3.364529 | 2.920584  |
| H    | 0.563890  | -3.859615 | 3.842650  |
| C    | -0.323537 | -3.915598 | 1.812890  |
| B    | -1.010254 | -3.049115 | -0.553285 |
| H    | -1.381826 | -4.160178 | -0.805495 |
| H    | -3.116466 | 1.004199  | -0.667794 |
| H    | 0.979303  | -1.234505 | 3.141853  |
| H    | -3.788727 | -3.208468 | -1.324058 |
| H    | -0.668716 | -4.920512 | 1.617648  |
| H    | 2.332014  | -0.504073 | -2.435114 |
| H    | 0.356086  | -4.326881 | -2.733079 |
| C    | -0.471675 | 4.600275  | 0.292503  |

| Atom | x         | y        | z         |
|------|-----------|----------|-----------|
| H    | -0.037511 | 5.603023 | 0.247797  |
| H    | -1.294651 | 4.583462 | 1.010734  |
| H    | -0.837057 | 4.311508 | -0.696288 |
| C    | 1.444175  | 3.921356 | 2.434612  |
| H    | 2.174879  | 3.180368 | 2.769282  |
| H    | 0.623364  | 3.980941 | 3.152452  |
| H    | 1.925761  | 4.898714 | 2.339542  |
| C    | 2.179112  | 3.525779 | -0.358690 |
| H    | 2.982132  | 2.853215 | -0.049985 |
| H    | 2.553386  | 4.553856 | -0.357641 |
| H    | 1.844262  | 3.270189 | -1.365475 |

| Atom | x         | y         | z         |
|------|-----------|-----------|-----------|
| O    | -0.484578 | -2.050241 | 2.750269  |
| P    | -0.304218 | 1.415984  | 2.429943  |
| B    | -0.308934 | -1.866930 | -2.453546 |
| N    | -1.817825 | -1.559629 | -0.451881 |
| N    | -1.569524 | -2.184895 | -1.625090 |
| C    | -2.561069 | -3.053600 | -1.890819 |
| C    | -3.485275 | -2.996767 | -0.862544 |
| C    | -2.972483 | -2.042251 | 0.018068  |
| N    | -0.360476 | 0.565709  | -1.809018 |
| N    | -0.322297 | -0.362679 | -2.790348 |
| C    | -0.315366 | 0.245772  | -3.988780 |
| C    | -0.348014 | 1.615350  | -3.787344 |
| C    | -0.375950 | 1.764688  | -2.399454 |
| C    | 1.338139  | 1.122265  | 0.271567  |
| N    | 1.098503  | -1.527010 | -0.395739 |
| N    | 0.927657  | -2.155157 | -1.580020 |
| C    | 2.240362  | -1.979965 | 0.130851  |
| C    | 1.951804  | -2.998060 | -1.797128 |
| C    | 2.822436  | -2.918699 | -0.723227 |
| H    | -3.369495 | -1.680698 | 0.956051  |
| H    | -0.405325 | 2.662970  | -1.798758 |
| H    | -2.535479 | -3.648223 | -2.792338 |
| H    | -0.289473 | -0.339573 | -4.896417 |
| H    | 2.579100  | -1.608554 | 1.087899  |
| H    | 1.985667  | -3.593267 | -2.698068 |
| C    | -1.709761 | 1.205455  | 3.577541  |
| H    | -1.752065 | 0.174161  | 3.935688  |
| H    | -2.647823 | 1.444664  | 3.071040  |
| H    | -1.579396 | 1.877825  | 4.430746  |
| C    | 1.153537  | 1.143341  | 3.497590  |
| H    | 1.166039  | 0.106625  | 3.843569  |
| H    | 1.102778  | 1.813107  | 4.361469  |
| H    | 2.071797  | 1.342123  | 2.939951  |
| C    | -0.286194 | 3.216183  | 2.115684  |
| H    | -1.194314 | 3.503636  | 1.579648  |
| H    | 0.582668  | 3.484370  | 1.510023  |
| H    | -0.242865 | 3.752520  | 3.068479  |
| H    | 3.743497  | -3.462335 | -0.578909 |
| H    | -0.352944 | 2.392279  | -4.536361 |
| H    | -4.398437 | -3.563206 | -0.763144 |
| H    | -0.284480 | -2.526122 | -3.454483 |
| N    | 2.333372  | 1.701692  | 0.107482  |
| C    | 3.552672  | 2.400743  | -0.097600 |
| H    | 4.356475  | 1.677239  | -0.246703 |
| H    | 3.762701  | 3.013021  | 0.781428  |
| H    | 3.455964  | 3.037019  | -0.979292 |

### Thermodynamic Properties at 298.15 K

|                          |              |         |                                                |
|--------------------------|--------------|---------|------------------------------------------------|
| Zero Point Energy :      | 859.87       | kJ/mol  | (ZPE)                                          |
| Temperature Correction : | 64.63        | kJ/mol  | (vibration + gas law + rotation + translation) |
| Enthalpy Correction :    | 924.50       | kJ/mol  | (ZPE + temperature correction)                 |
| Enthalpy :               | -1503.391182 | au      | (Electronic Energy + Enthalpy Correction)      |
| Entropy :                | 662.68       | J/mol•K |                                                |
| Gibbs Energy :           | -1503.466436 | au      | (Enthalpy - T*Entropy)                         |
| C <sub>v</sub> :         | 449.33       | J/mol•K |                                                |

### 16. [W(CNMe)(PMe<sub>3</sub>)(CO)<sub>2</sub>(Tp\*)]<sup>+</sup> -PCM κ = 7.43 (THF)

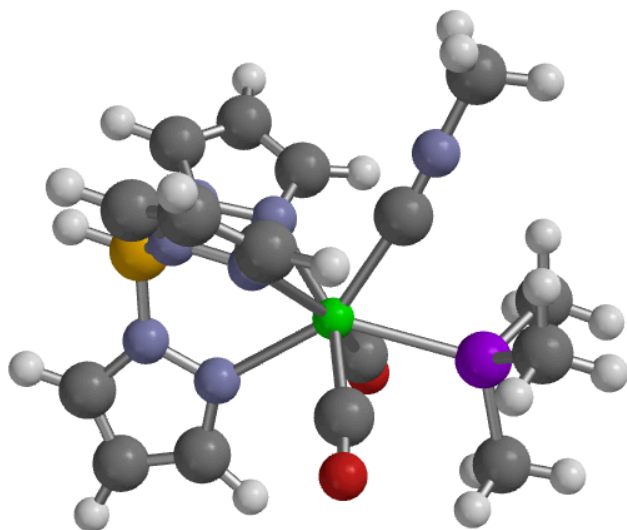

Figure S17: Optimised structure of the cation [W(CNMe)(PMe<sub>3</sub>)(CO)<sub>2</sub>(Tp\*)]<sup>+</sup> [DFT: ωB97X-D/6-31G\*/LANL2DZ/PCM κ = 7.43 (THF)].

### Cartesian Coordinates

| Atom | x         | y         | z        |
|------|-----------|-----------|----------|
| W    | -0.399008 | -0.031070 | 0.353294 |
| C    | -2.051605 | 1.062363  | 0.378210 |
| O    | -3.041648 | 1.653680  | 0.281431 |
| C    | -0.458849 | -1.245853 | 1.919088 |



## Thermodynamic Properties at 298.15 K

|                          |              |         |                                                |
|--------------------------|--------------|---------|------------------------------------------------|
| Zero Point Energy :      | 967.61       | kJ/mol  | (ZPE)                                          |
| Temperature Correction : | 68.46        | kJ/mol  | (vibration + gas law + rotation + translation) |
| Enthalpy Correction :    | 1036.07      | kJ/mol  | (ZPE + temperature correction)                 |
| Enthalpy :               | -1589.931991 | au      | (Electronic Energy + Enthalpy Correction)      |
| Entropy :                | 681.06       | J/mol•K |                                                |
| Gibbs Energy :           | -1590.009332 | au      | (Enthalpy - T*Entropy)                         |
| C <sub>v</sub> :         | 476.30       | J/mol•K |                                                |

17. [W(MeNCPMe<sub>3</sub>)(CO)<sub>2</sub>(Tp\*)]<sup>+</sup> -PCM κ = 7.43 (THF)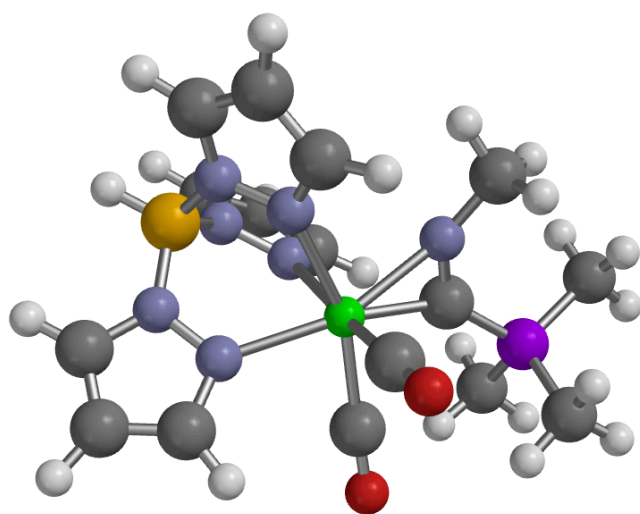

Figure S18: Optimised structure of the cation [W(MeNCPMe<sub>3</sub>)(CO)<sub>2</sub>(Tp\*)]<sup>+</sup> [DFT: ωB97X-D/6-31G\*/LANL2DZ/PCM κ = 7.43 (THF)].

| Atom | x         | y         | z         |
|------|-----------|-----------|-----------|
| C    | -2.505750 | 0.401029  | -0.666275 |
| C    | -3.727150 | -0.255929 | -0.842129 |
| H    | -4.708806 | 0.182463  | -0.937094 |
| C    | -3.391803 | -1.598654 | -0.873664 |
| C    | 1.006416  | -2.433078 | 2.139322  |
| C    | 0.462129  | -3.644820 | 2.566561  |
| H    | 0.692309  | -4.194384 | 3.466472  |
| C    | -0.434090 | -3.993105 | 1.567428  |
| B    | -1.176241 | -2.959355 | -0.718284 |
| H    | -1.838306 | -3.946662 | -0.885324 |
| H    | -2.307782 | 1.460228  | -0.591418 |
| H    | 1.753090  | -1.804836 | 2.604532  |
| H    | -4.000580 | -2.482759 | -0.997805 |
| H    | -1.076658 | -4.855084 | 1.459635  |
| H    | 2.500444  | -1.400267 | -2.963325 |
| H    | -0.469294 | -4.523868 | -3.016875 |
| C    | -0.520566 | 3.946442  | -1.048749 |
| H    | -0.327825 | 5.012254  | -1.199347 |
| H    | -1.594466 | 3.786211  | -0.917959 |
| H    | -0.163329 | 3.382056  | -1.914162 |
| C    | -0.324140 | 4.248964  | 1.876487  |
| H    | 0.288755  | 4.031615  | 2.754473  |
| H    | -1.351669 | 3.914537  | 2.041765  |
| H    | -0.315319 | 5.326170  | 1.685259  |
| C    | 2.118816  | 3.765155  | 0.273827  |
| H    | 2.651268  | 3.335972  | 1.127755  |
| H    | 2.255812  | 4.850410  | 0.255890  |
| H    | 2.497485  | 3.329267  | -0.653904 |
| N    | 0.149314  | 0.835771  | 1.517309  |
| C    | 0.199249  | 0.981322  | 2.955400  |
| H    | 1.226080  | 1.215604  | 3.258006  |
| H    | -0.098754 | 0.036774  | 3.411412  |
| H    | -0.473489 | 1.776002  | 3.287688  |

## Thermodynamic Properties at 298.15 K

|                          |              |         |                                                |
|--------------------------|--------------|---------|------------------------------------------------|
| Zero Point Energy :      | 969.39       | kJ/mol  | (ZPE)                                          |
| Temperature Correction : | 66.91        | kJ/mol  | (vibration + gas law + rotation + translation) |
| Enthalpy Correction :    | 1036.31      | kJ/mol  | (ZPE + temperature correction)                 |
| Enthalpy :               | -1589.908638 | au      | (Electronic Energy + Enthalpy Correction)      |
| Entropy :                | 670.18       | J/mol•K |                                                |
| Gibbs Energy :           | -1589.984743 | au      | (Enthalpy - T*Entropy)                         |
| C <sub>v</sub> :         | 468.42       | J/mol•K |                                                |

## Cartesian Coordinates

| Atom | x         | y         | z         |
|------|-----------|-----------|-----------|
| W    | 0.754490  | -0.255601 | -0.256462 |
| P    | 0.356727  | 3.413770  | 0.430489  |
| O    | 1.814911  | 1.499209  | -2.665631 |
| O    | 3.781608  | -0.155941 | 0.437018  |
| N    | 0.805004  | -1.827027 | -1.798656 |
| N    | -0.119725 | -2.817981 | -1.833742 |
| N    | -1.504554 | -0.479274 | -0.594177 |
| N    | -2.060267 | -1.704641 | -0.721860 |
| N    | 0.468008  | -2.074154 | 0.968882  |
| N    | -0.416689 | -3.037696 | 0.624820  |
| C    | 0.235618  | 1.615005  | 0.529959  |
| C    | 1.384436  | 0.856341  | -1.801977 |
| C    | 2.637501  | -0.189733 | 0.171982  |
| C    | 1.660091  | -2.060059 | -2.802864 |
| C    | 1.283944  | -3.204268 | -3.504683 |
| H    | 1.770127  | -3.645332 | -4.361525 |
| C    | 0.153620  | -3.658063 | -2.844476 |

**Table S1.** Gibbs Energy (au)<sup>a</sup> for Isomeric [W(ECPMe<sub>3</sub>)(CO)<sub>2</sub>(Tp)]<sup>+</sup> **2<sup>E</sup>** vs [W(CE)(PMe<sub>3</sub>)(CO)<sub>2</sub>(Tp)]<sup>+</sup> **8<sup>E</sup>**.

| E   | <b>8<sup>E</sup></b>     | <b>2<sup>E</sup></b>     | <b>8<sup>E</sup> → 2<sup>E</sup></b> |                                                 |
|-----|--------------------------|--------------------------|--------------------------------------|-------------------------------------------------|
|     | $\Delta G^\circ$<br>a.u. | $\Delta G^\circ$<br>a.u. | $\Delta\Delta G^\circ$<br>a.u.       | $\Delta\Delta G^\circ$<br>kcalmol <sup>-1</sup> |
| O   | -1570.911292             | -1570.870482             | +0.04081                             | +25.61                                          |
| S   | -1893.844183             | -1893.855864             | -0.011681                            | -7.33                                           |
| Se  | -3896.986728             | -3897.011456             | -0.024728                            | -15.52                                          |
| Te  | -1503.705068             | -1503.743305             | -0.038237                            | -24.00                                          |
| NMe | -1590.326609             | -1590.303348             | +0.023261                            | +14.60                                          |

<sup>a</sup>DFT: ωB97X-D/6-31G\*/LANL2DZ/polarization continuum model ( $\epsilon = 7.43$ ).**Table S2.** Calculated Infrared data for [W(ECPMe<sub>3</sub>)(CO)<sub>2</sub>(Tp)]<sup>+</sup> **2<sup>E</sup>** vs [W(CE)(PMe<sub>3</sub>)(CO)<sub>2</sub>(Tp)]<sup>+</sup> **8<sup>E</sup>**.

| E   | [W(CE)(PMe <sub>3</sub> )(CO) <sub>2</sub> (Tp)] <sup>+</sup> <b>8<sup>E</sup></b> |                                |                               | [W(ECPMe <sub>3</sub> )(CO) <sub>2</sub> (Tp)] <sup>+</sup> <b>2<sup>E</sup></b> |                                |                               |
|-----|------------------------------------------------------------------------------------|--------------------------------|-------------------------------|----------------------------------------------------------------------------------|--------------------------------|-------------------------------|
|     | $\nu_{CO}$ [cm <sup>-1</sup> ]                                                     | $\nu_{CO}$ [cm <sup>-1</sup> ] | $k_{CO}$ [Ncm <sup>-1</sup> ] | $\nu_{CO}$ [cm <sup>-1</sup> ]                                                   | $\nu_{CO}$ [cm <sup>-1</sup> ] | $k_{CO}$ [Ncm <sup>-1</sup> ] |
|     | Raw                                                                                | Scaled <sup>a</sup>            |                               | Raw                                                                              | Scaled <sup>a</sup>            |                               |
| O   | 2160                                                                               | 2034                           |                               | 2106                                                                             | 1984                           |                               |
|     | 2050                                                                               | 1931                           | <i>b</i>                      | 1976                                                                             | 1861                           | 14.92                         |
| S   | 2135                                                                               | 2011 <sup>d</sup>              |                               | 2118                                                                             | 1995                           |                               |
|     | 2068                                                                               | 1948                           | 15.80                         | 2025                                                                             | 1908                           | 15.36                         |
| Se  | 2137                                                                               | 2013                           |                               | 2123                                                                             | 2000                           |                               |
|     | 2034                                                                               | 1916 <sup>e</sup>              | 15.57                         | 2034                                                                             | 1916                           | 15.47                         |
| Te  | 2143                                                                               | 2019 <sup>f</sup>              |                               | 2125                                                                             | 2002                           |                               |
|     | 2088                                                                               | 1967                           | 16.02                         | 2041                                                                             | 1923                           | 15.54                         |
| NMe | 2078 <sup>g</sup>                                                                  | 1957 <sup>i</sup>              |                               | 2052                                                                             | 1933                           |                               |
|     | 1990                                                                               | 1975                           | 15.59                         | 1924                                                                             | 1812                           | 14.15                         |

<sup>a</sup> $\lambda = 0.942$ ; <sup>b</sup>Molecule has C<sub>3v</sub> symmetry, *i.e.*, modes not directly comparable.<sup>c</sup>Experimentally determined for [W(CO)<sub>3</sub>(PMe<sub>3</sub>)(Tp\*)]<sup>+</sup>  $\nu_{CO} = 2040, 1943$  cm<sup>-1</sup> in CH<sub>2</sub>Cl<sub>2</sub>. <sup>d</sup> $\nu_{CS} = 1210$  cm<sup>-1</sup>. <sup>e</sup> $\nu_{CSe} = 1057$  cm<sup>-1</sup>. <sup>f</sup> $\nu_{CTe} = 980$  cm<sup>-1</sup>. <sup>g</sup> $\nu_{CN} = 2205$  cm<sup>-1</sup>.



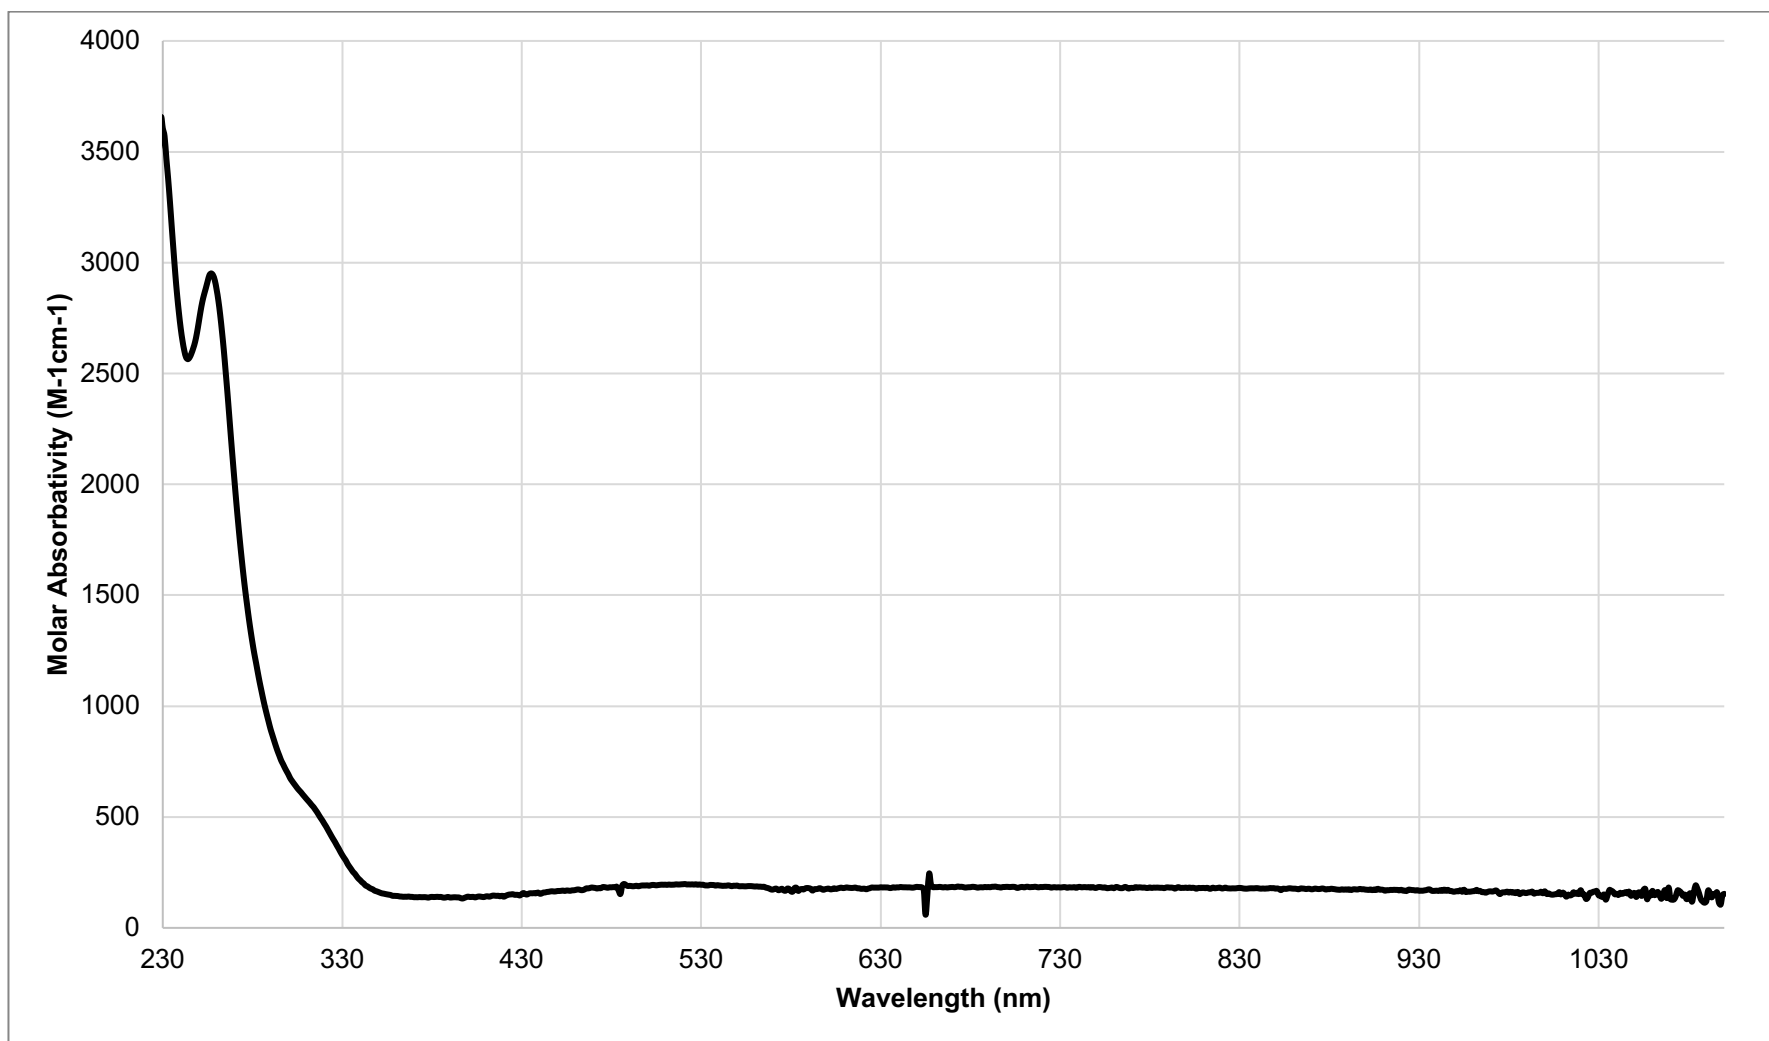

Figure S19 Electronic spectrum of  $[W(CPPH_3)(CO)_2(Tp^*)].PF_6$  in  $CH_2Cl_2$  [1a;  $M = 2.319(2) \times 10^{-5} molL^{-1}$ ].

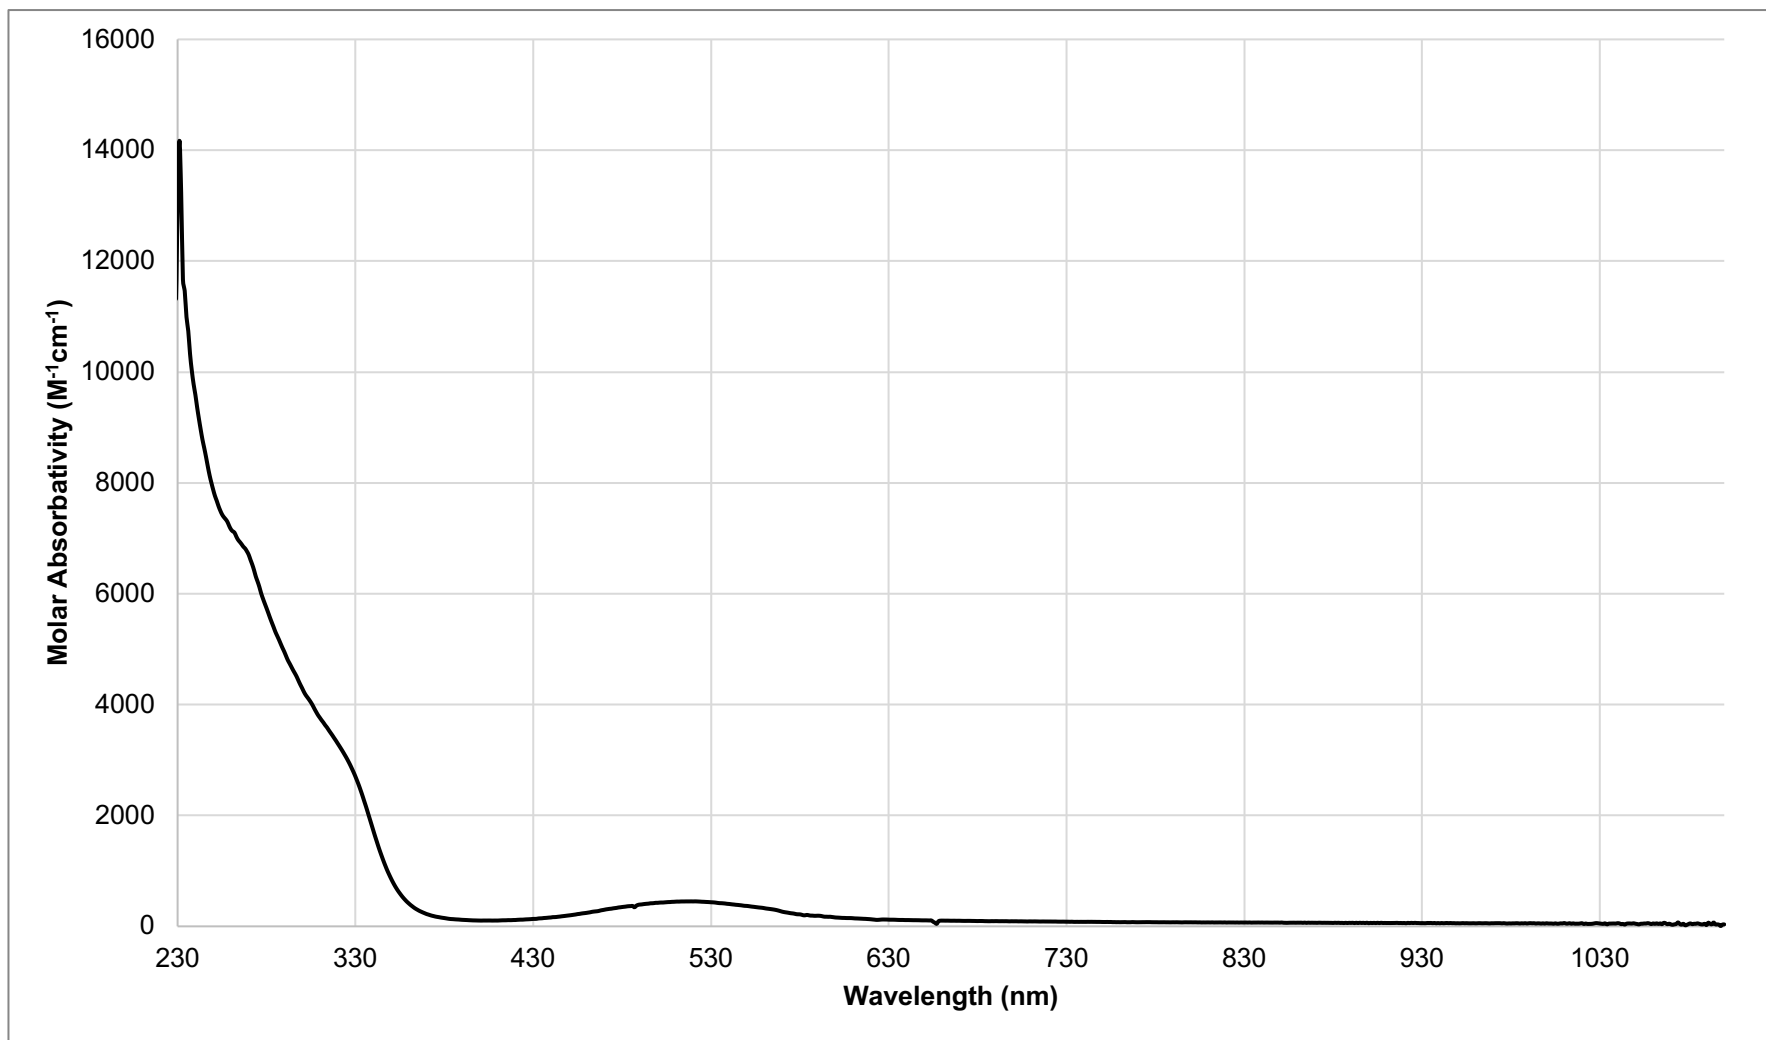

Figure S20: Electronic spectrum of [W(CPPH<sub>3</sub>)(CO)<sub>2</sub>(Tp<sup>\*</sup>)]·PF<sub>6</sub> in CH<sub>2</sub>Cl<sub>2</sub> [1a; M = 2.319(2)×10<sup>-4</sup> molL<sup>-1</sup>].

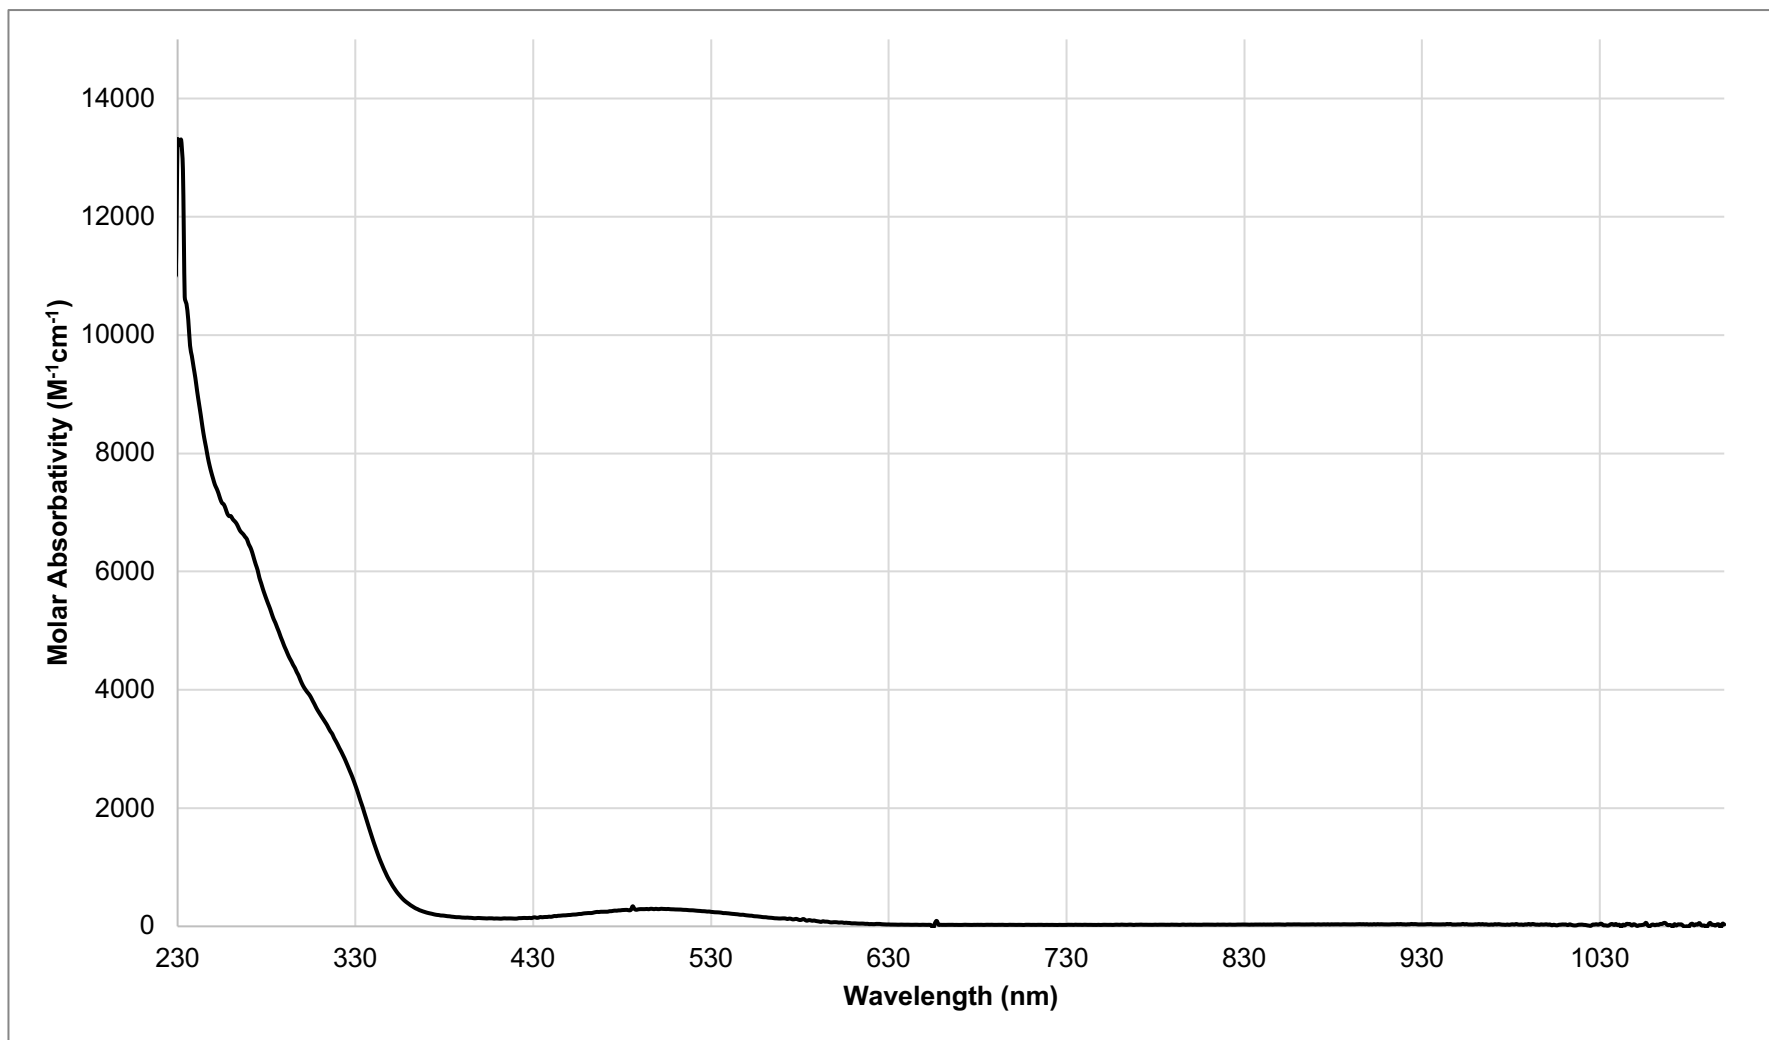

Figure S21: Electronic spectrum of  $[W(CPMePh_2)(CO)_2(Tp^*)].PF_6$  in  $CH_2Cl_2$  [1b;  $M = 2.404(2) \times 10^{-4} \text{ molL}^{-1}$ ].

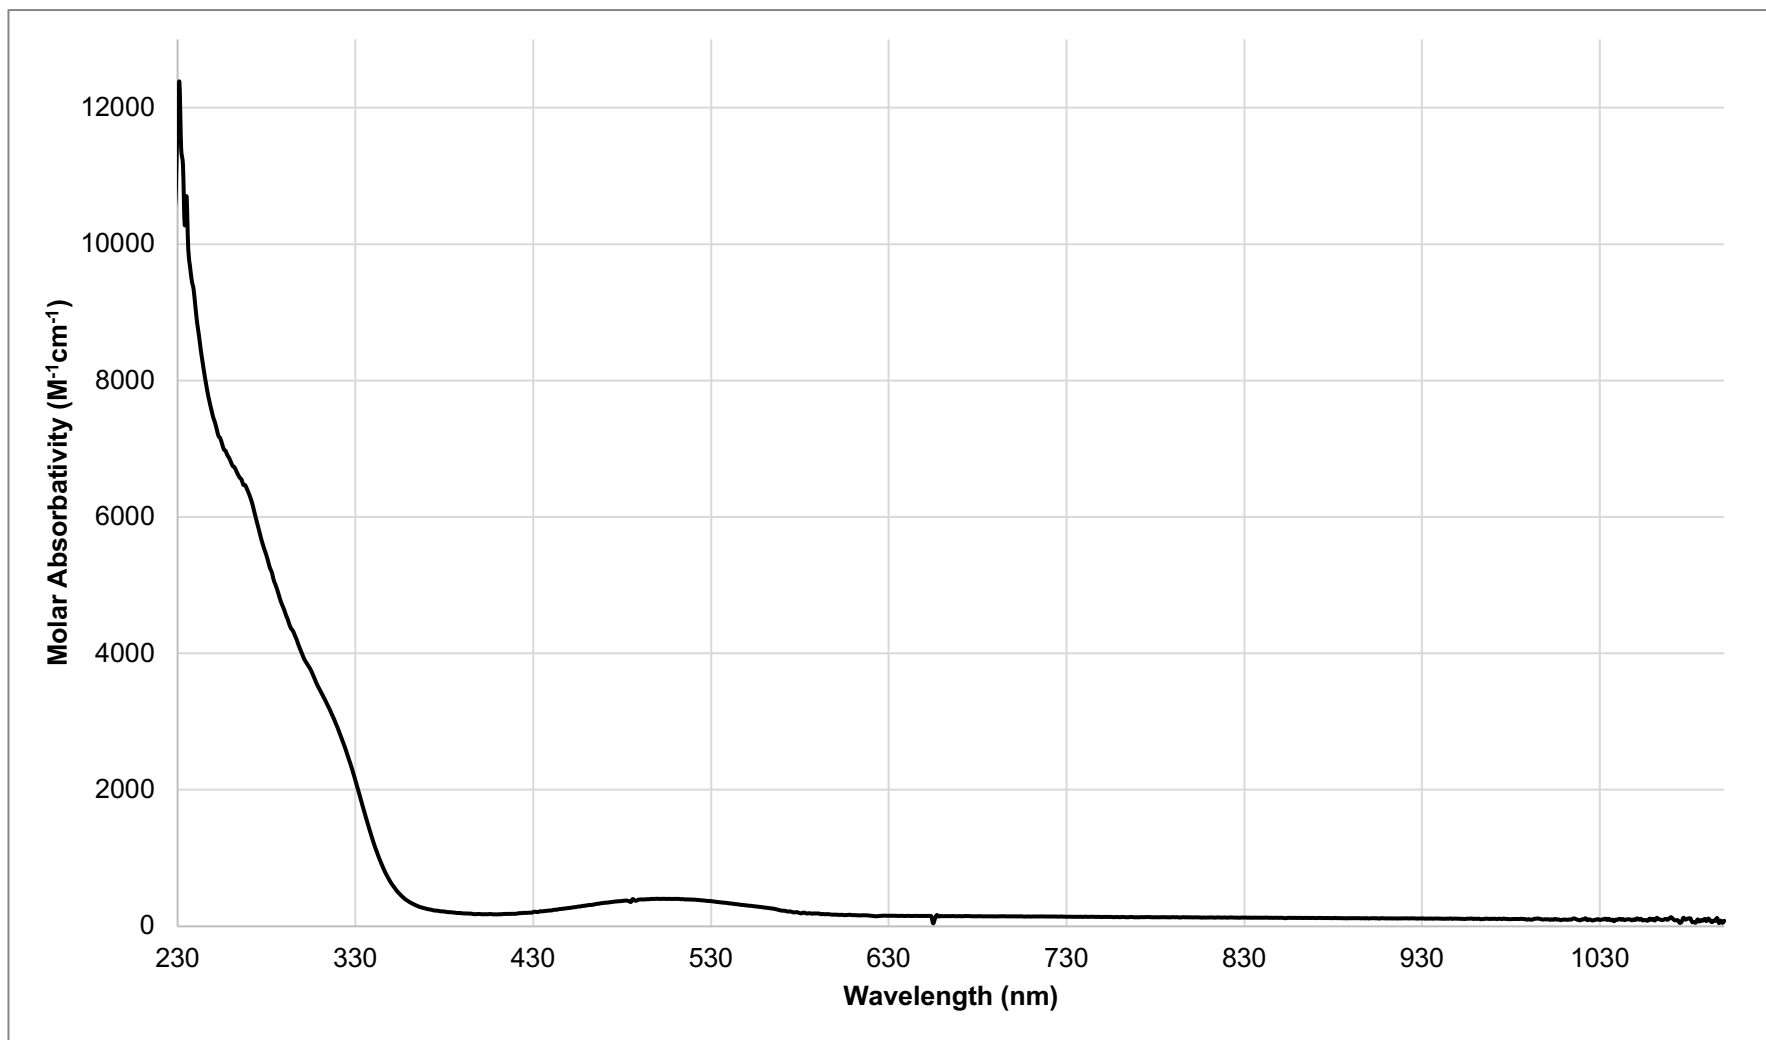

Figure S22: Electronic spectrum of [W(CPMe<sub>2</sub>Ph)(CO)<sub>2</sub>(Tp\*)].PF<sub>6</sub> in CH<sub>2</sub>Cl<sub>2</sub> [1b; M = 2.475(2) × 10<sup>-4</sup> molL<sup>-1</sup>].

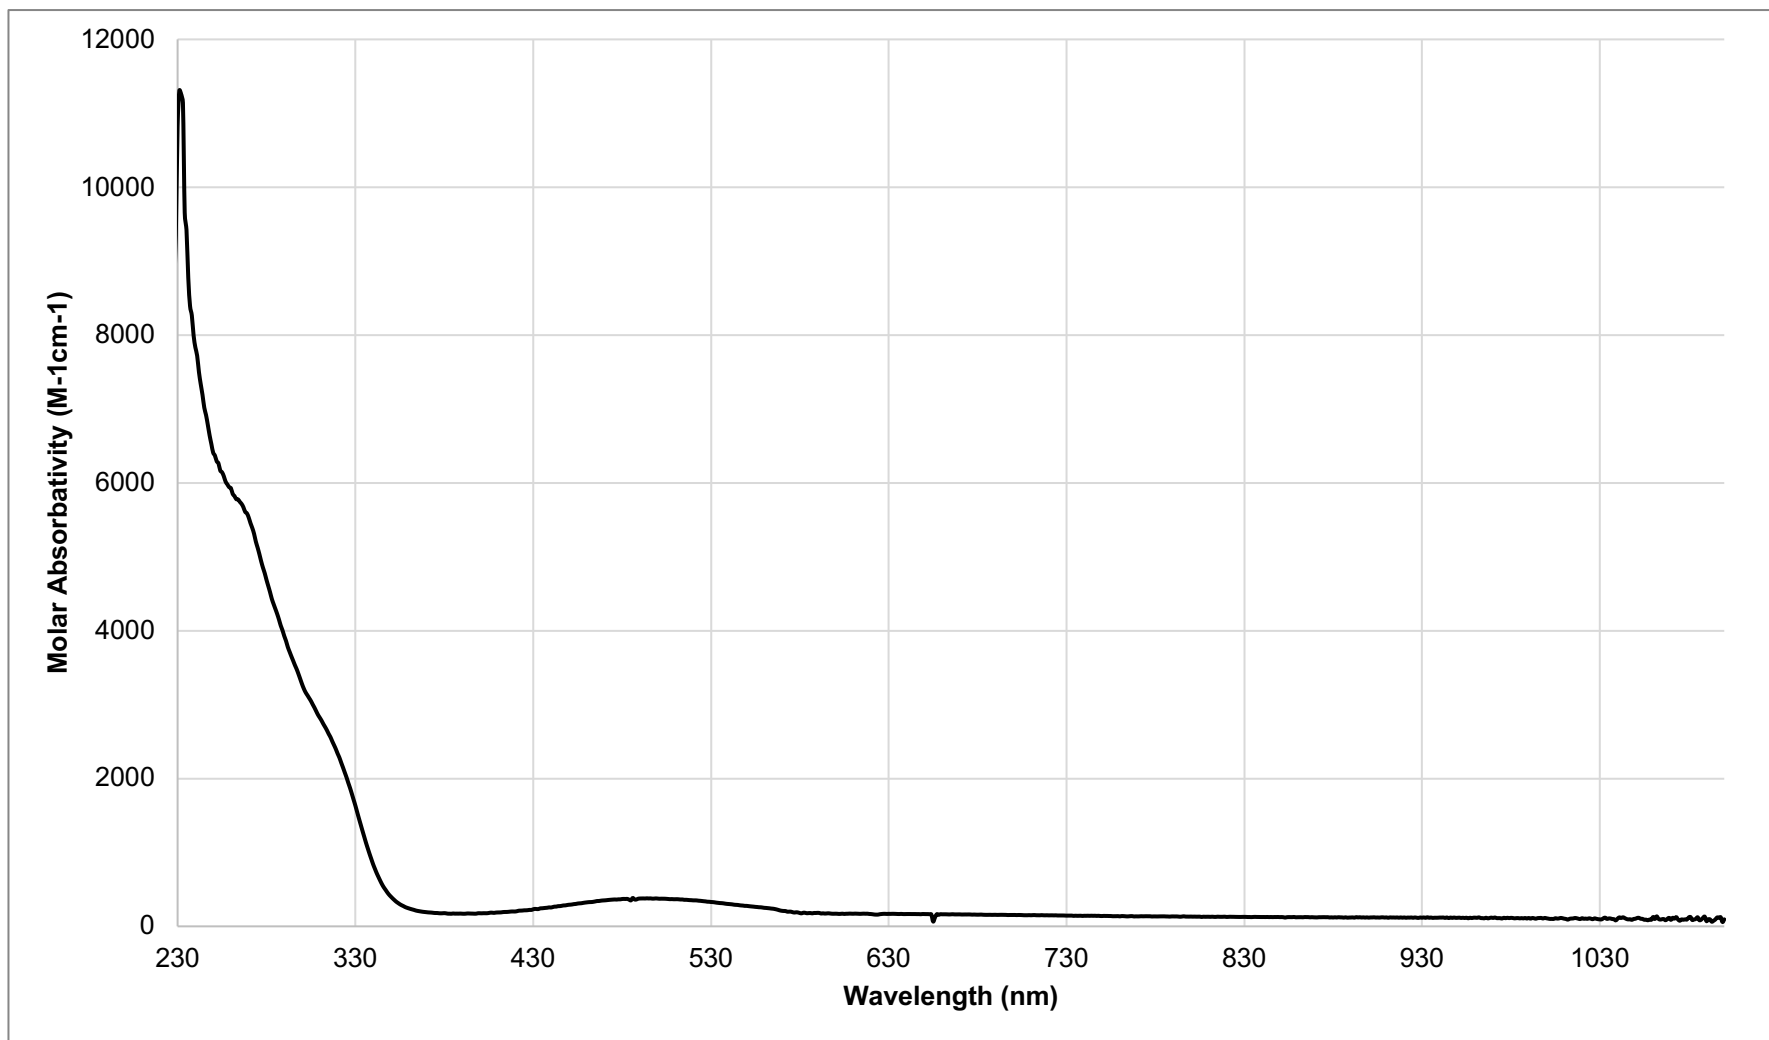

Figure S23: Electronic spectrum of  $[W(CPCy_3)(CO)_2(Tp^*)].PF_6^-$  in  $CH_2Cl_2$  [1d;  $M = 2.830(3) \times 10^{-4} \text{ molL}^{-1}$ ].

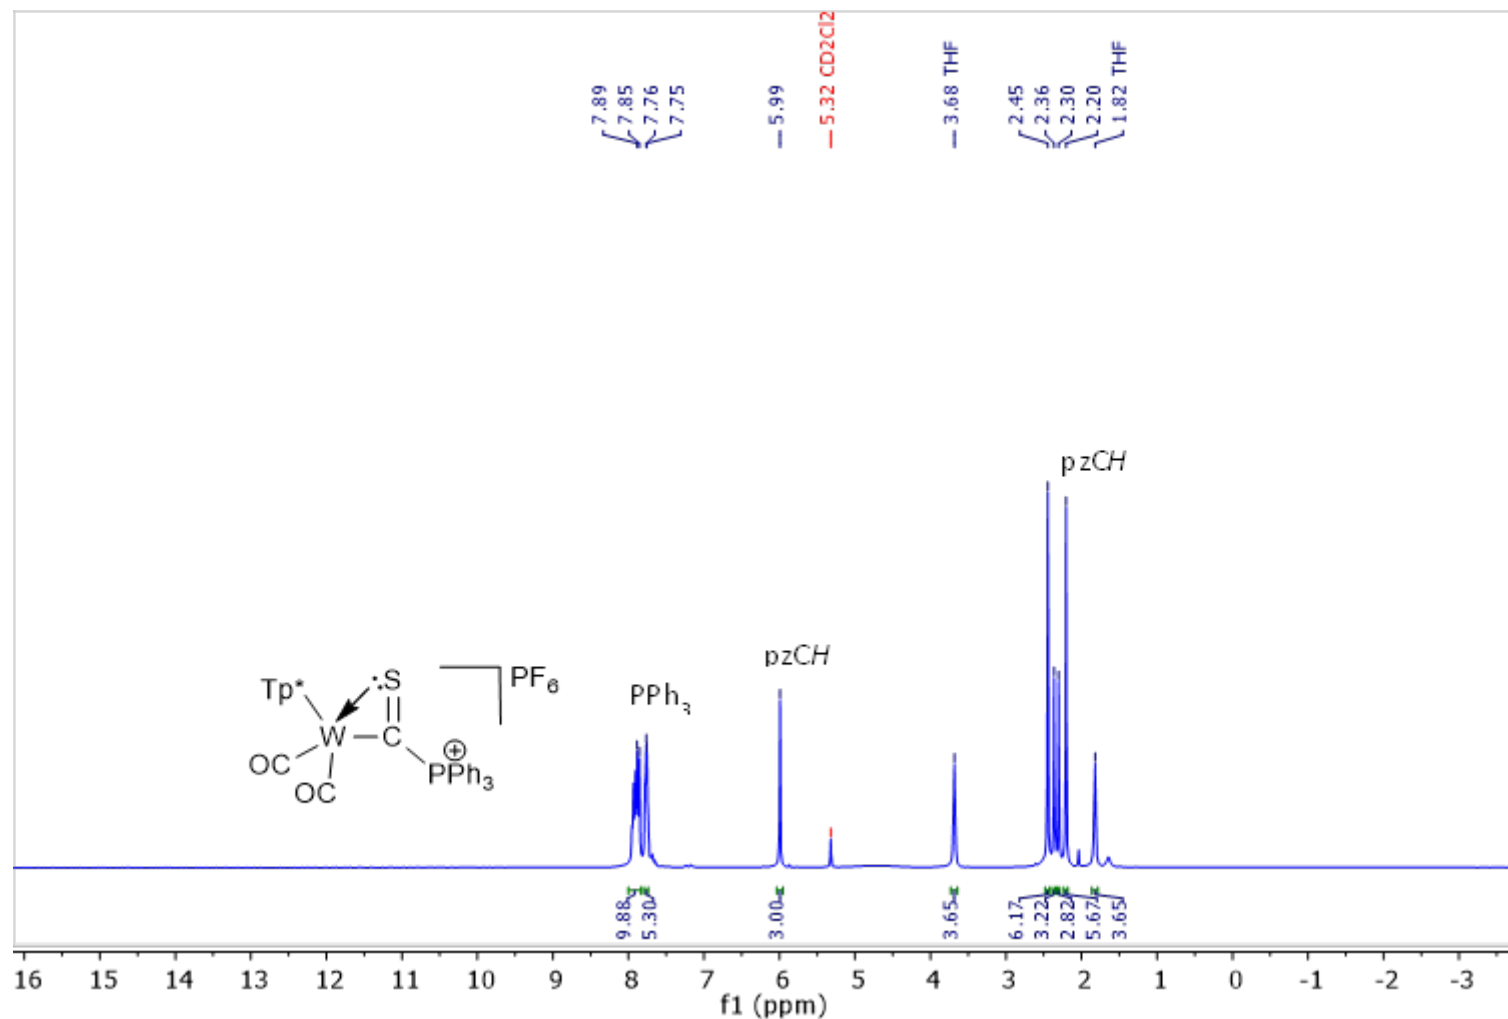

Figure S24:  $^1\text{H}$  NMR Spectrum of  $[\text{W}(\text{CSPPh}_3)(\text{CO})_2(\text{Tp}^*)]\text{PF}_6 \cdot 2(\text{C}_4\text{H}_4\text{O})$  (2a; 400 MHz,  $\text{CD}_2\text{Cl}_2$ , 25 °C,  $\delta$ )

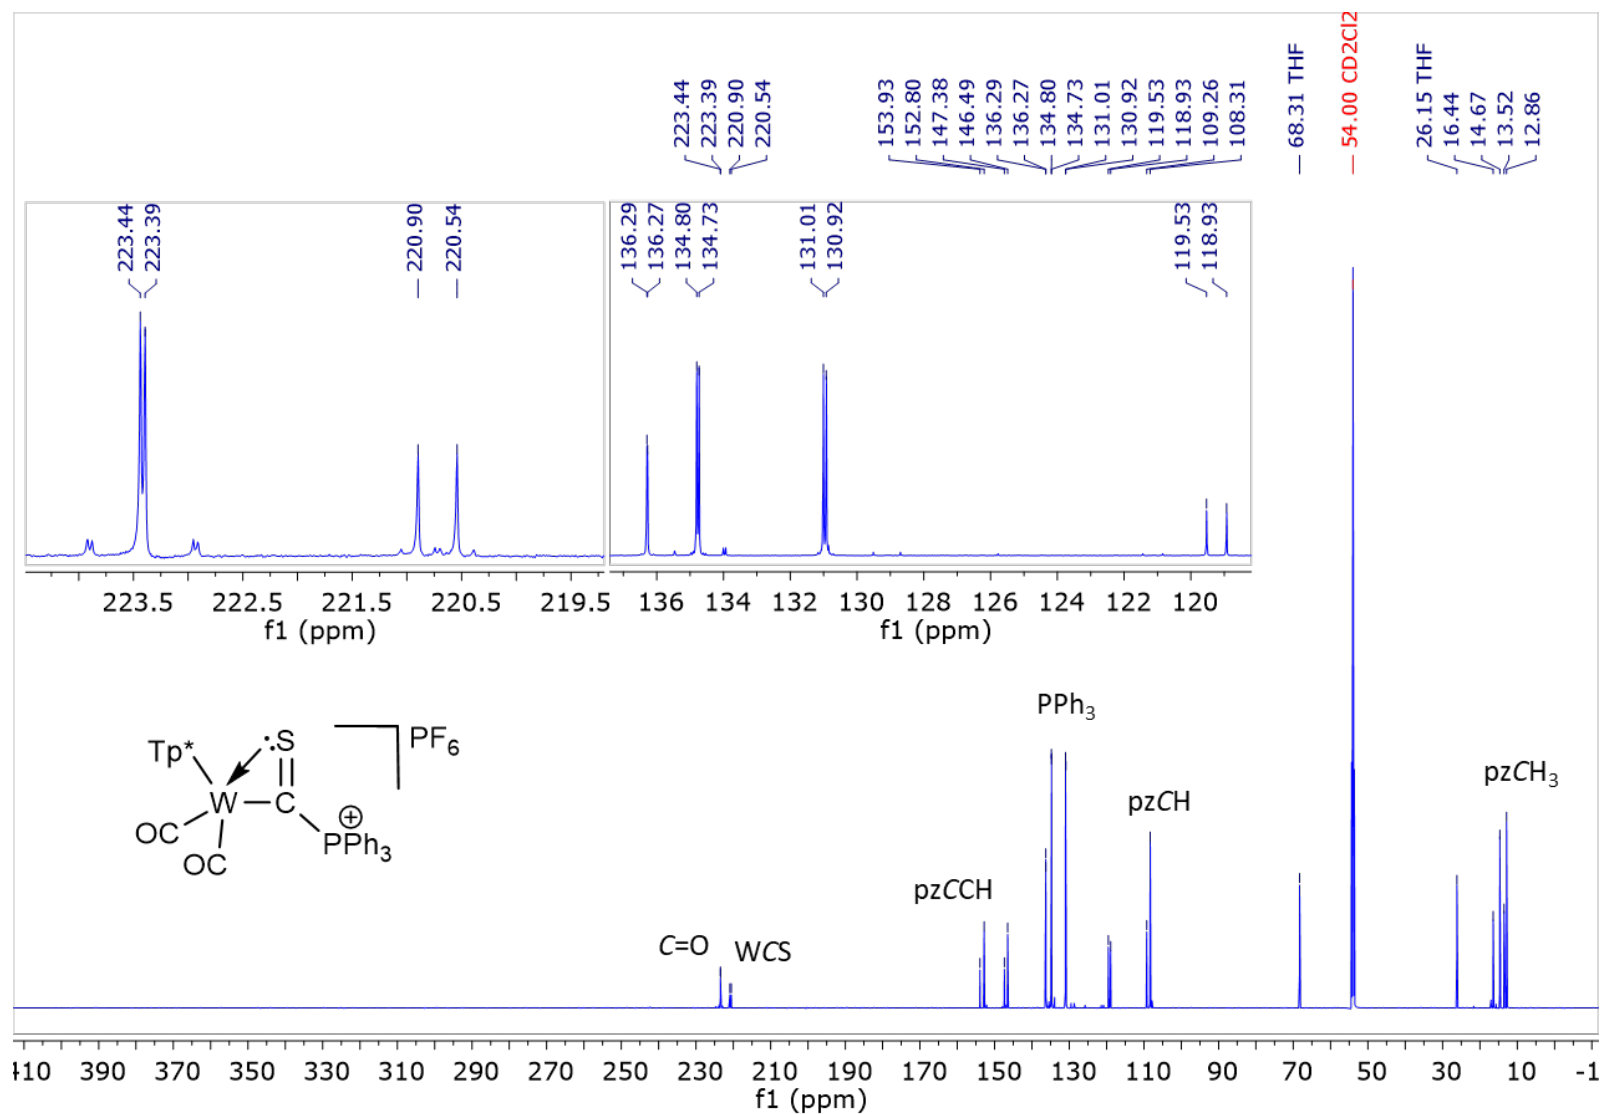

Figure S25:  $^{13}\text{C}\{^1\text{H}\}$  NMR Spectrum of  $[\text{W}(\text{CSPPh}_3)(\text{CO})_2(\text{Tp}^*)]\text{PF}_6 \cdot 2(\text{C}_4\text{H}_4\text{O})$  (2a; 151 MHz,  $\text{CD}_2\text{Cl}_2$ , 25 °C,  $\delta$ )



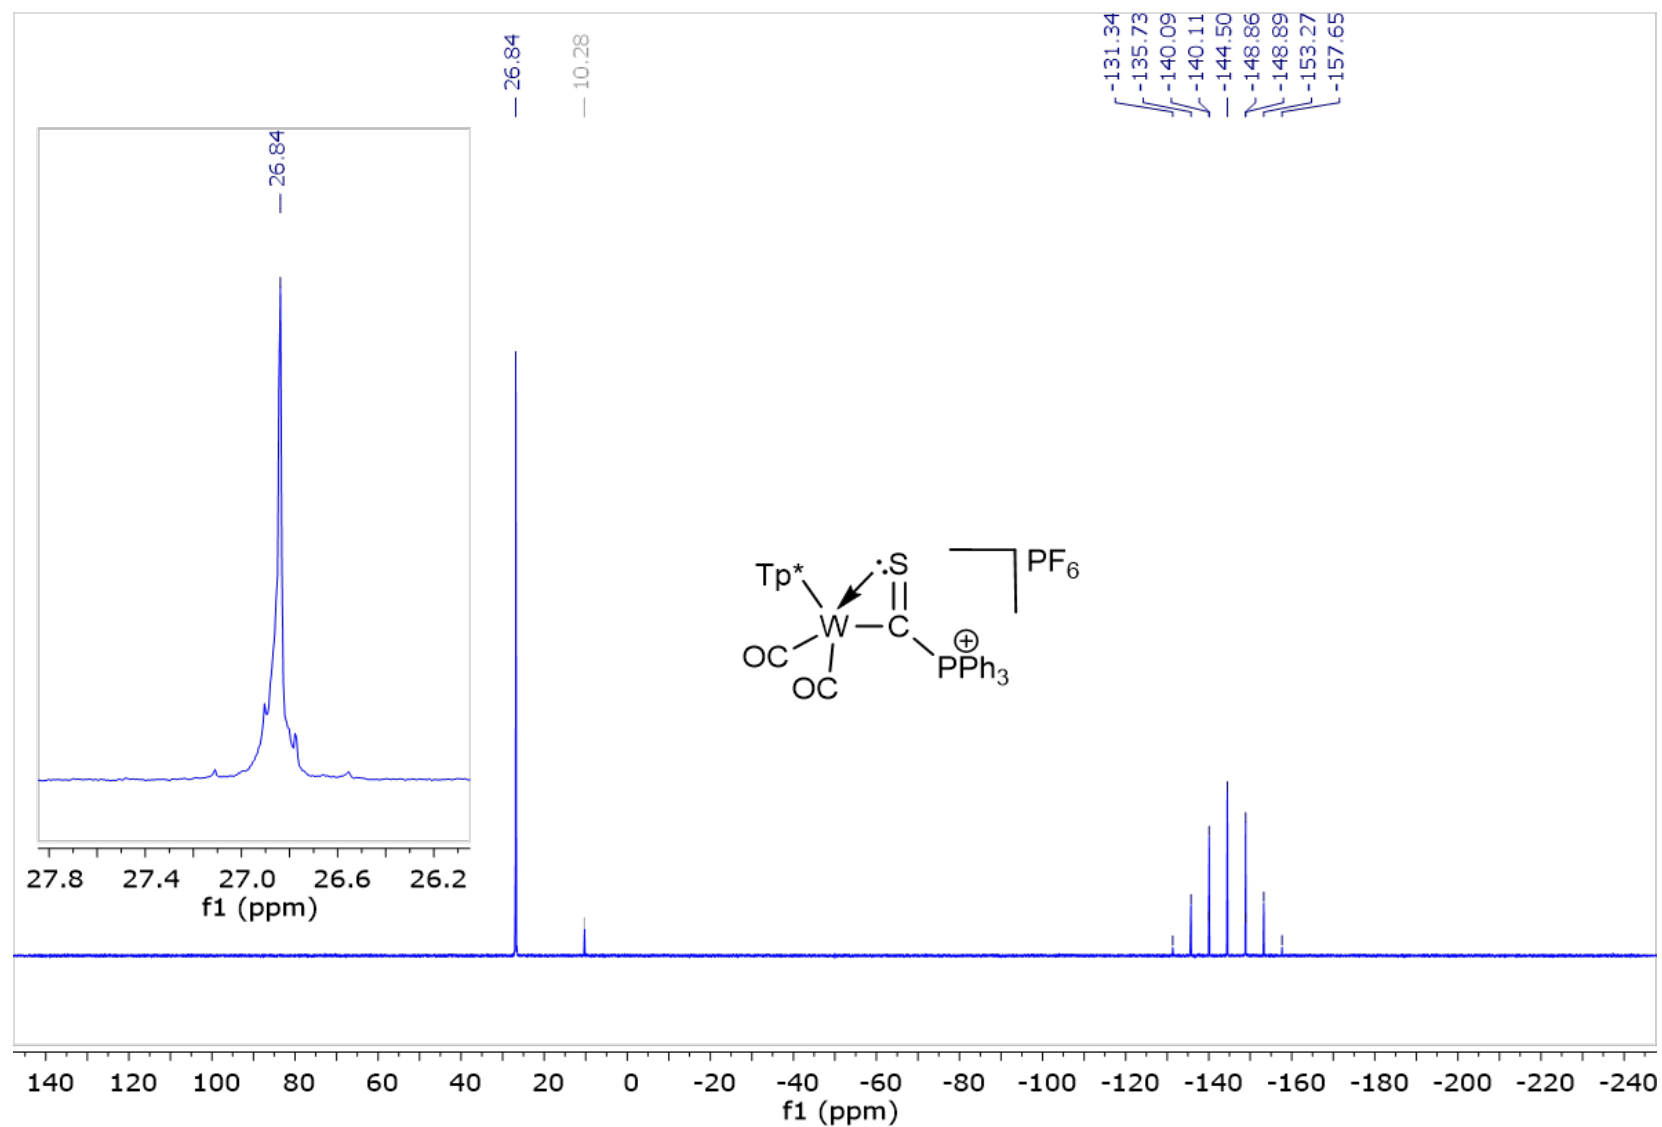

Figure S26:  $^{31}P\{^1H\}$  NMR Spectrum of  $[W(CSPPh_3)(CO)_2(Tp^*)]PF_6 \cdot 2(C_4H_4O)$  (2a; 162 MHz,  $CDCl_3$ , 25 °C,  $\delta$ )

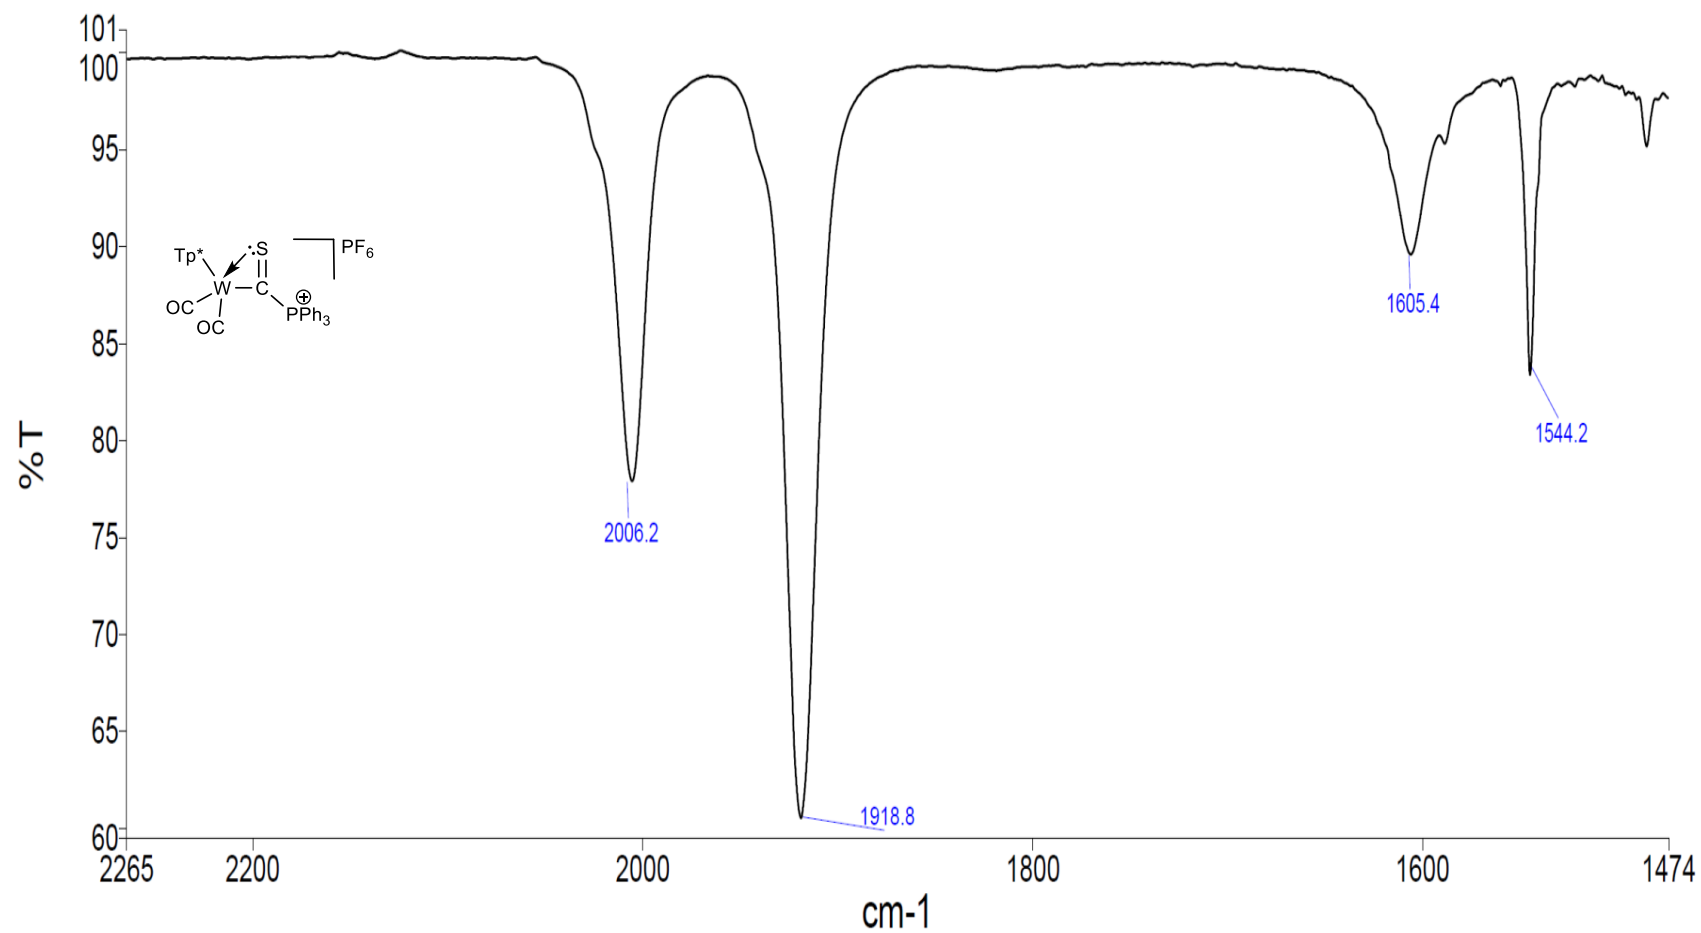

Figure S27: Infrared Spectrum of  $[W(CSPPh_3)(CO)_2(Tp^*)]PF_6 \cdot 2(C_4H_4O)$  (2a;  $CH_2Cl_2$ , 25 °C, v)

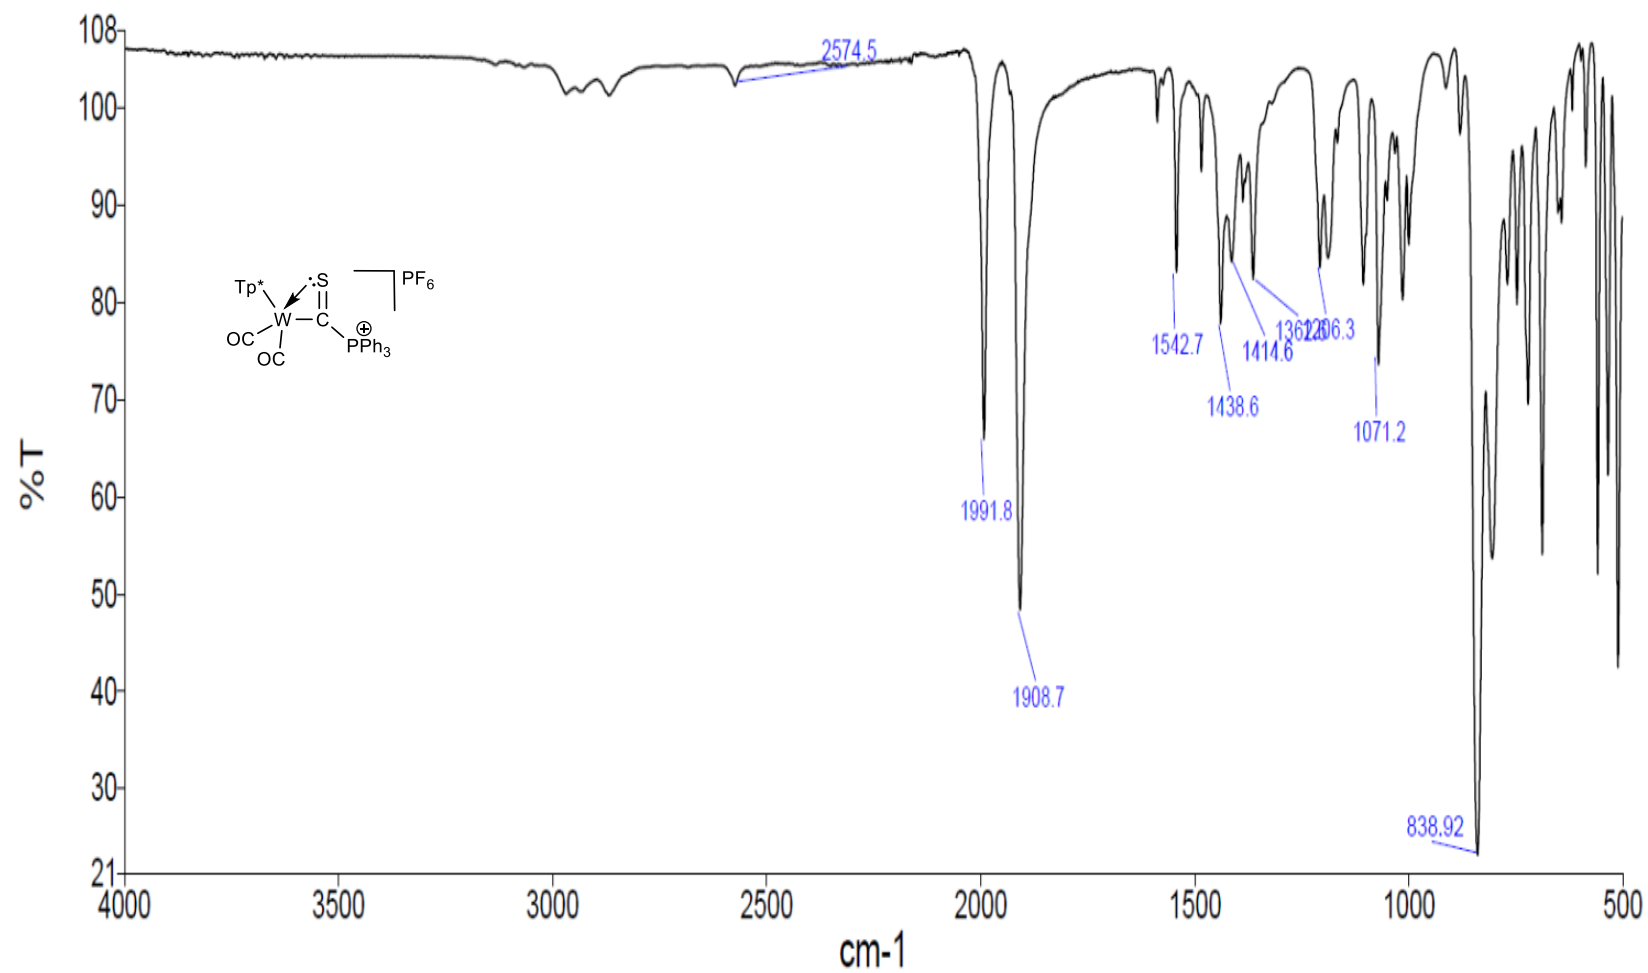

Figure S28: Infrared Spectrum of  $[W(CSPPh_3)(CO)_2(Tp^*)]PF_6 \cdot 2(C_4H_4O)$  (2a; ATR, 25 °C, v)

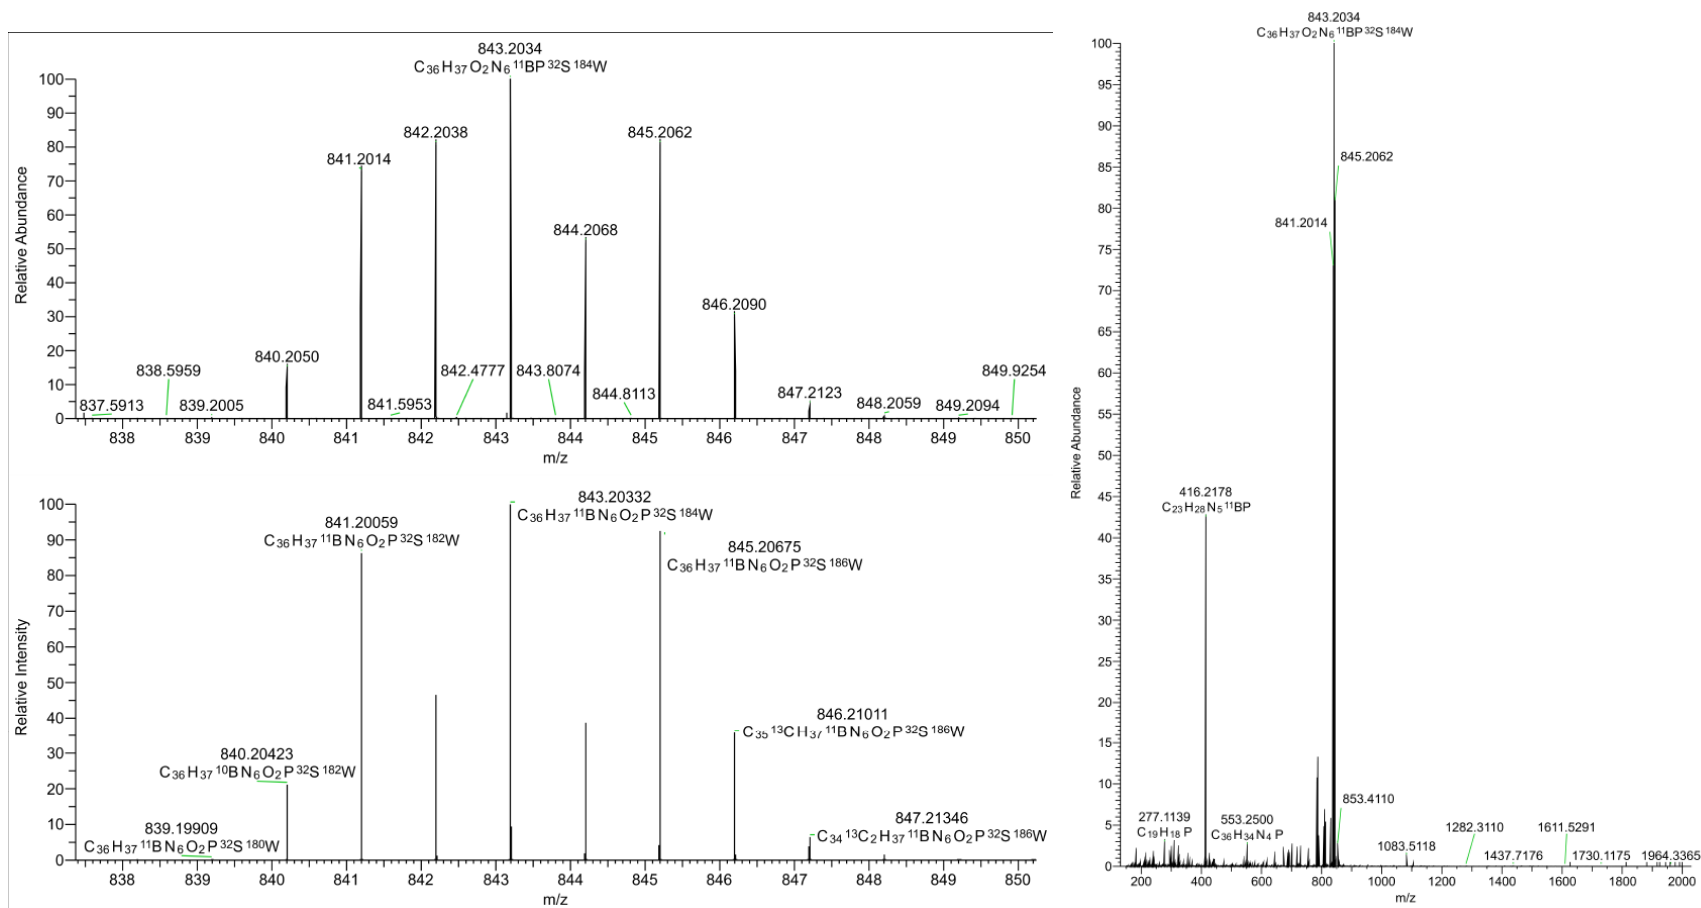

Figure S29: Mass Spectrum (ESI, +ve ion) of  $[W(SCPPH_3)(CO)_2(Tp^*)]PF_6 \cdot 2(C_4H_4O)$  (2a)

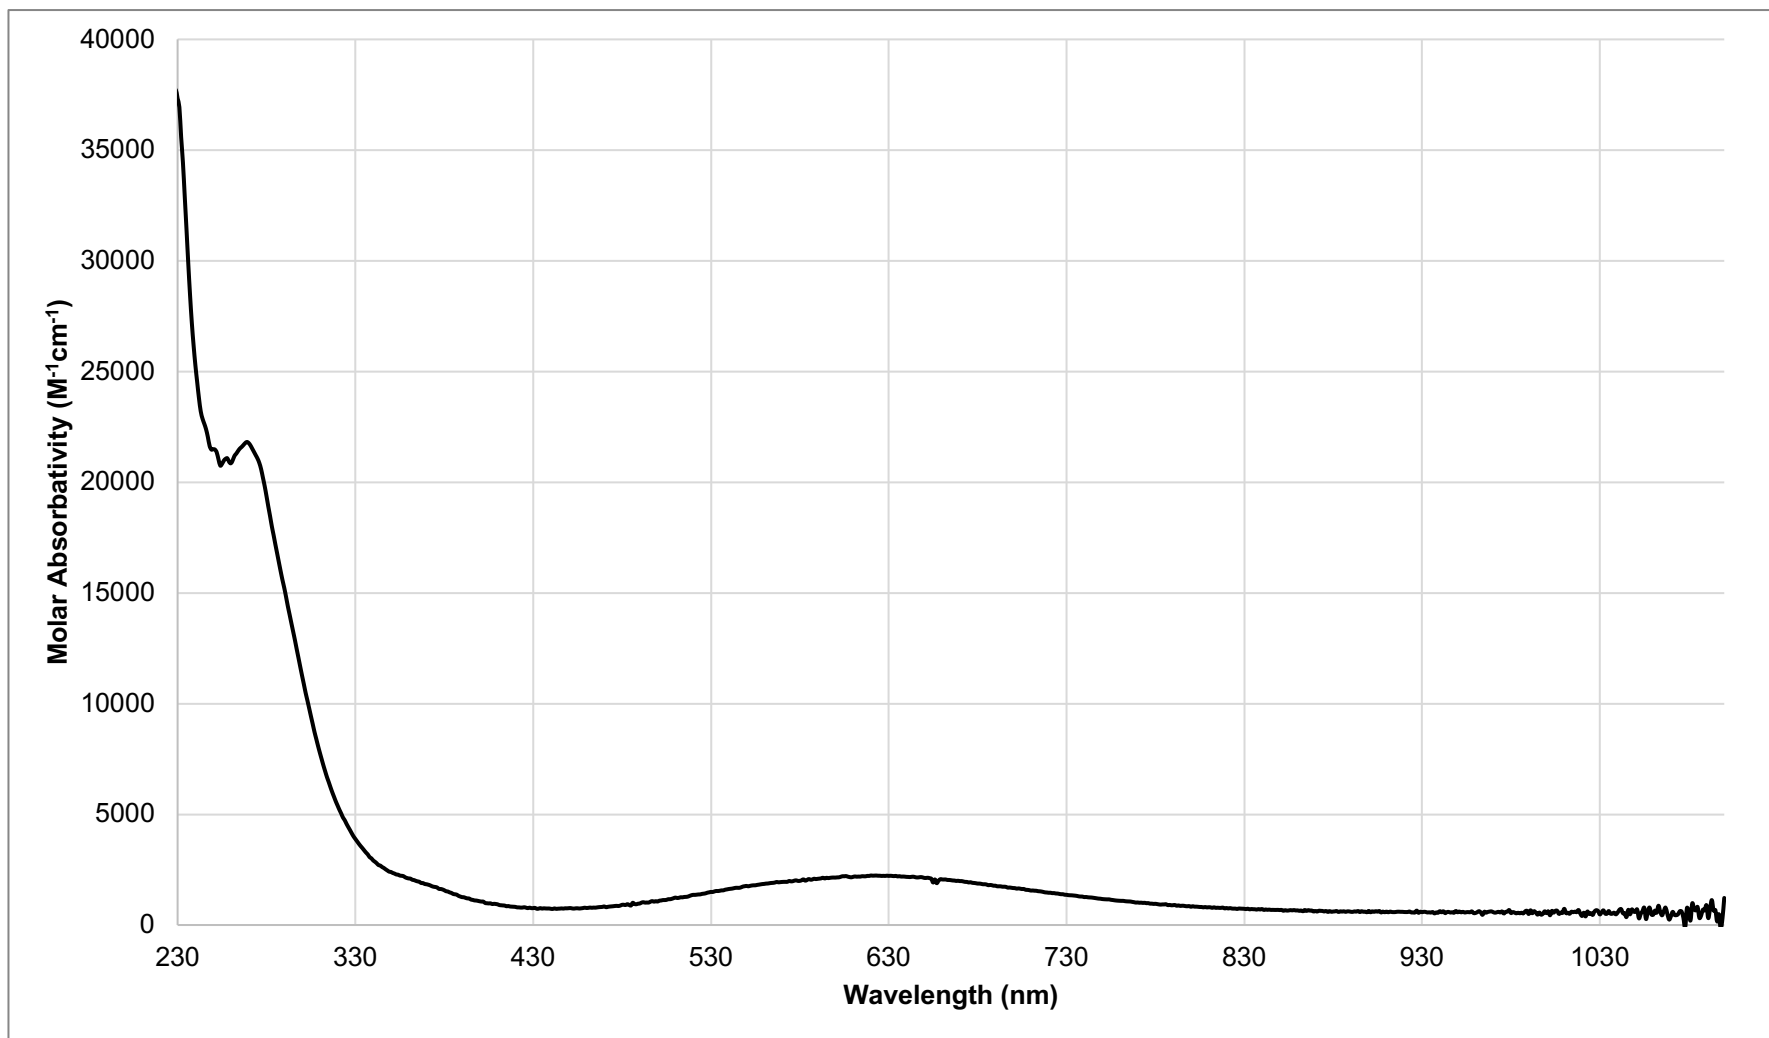

Figure S30: Electronic spectrum of  $[W(SCPPH_3)(CO)_2(Tp^*)].PF_6 \cdot 2(C_4H_4O)$  in  $CH_2Cl_2$  [2a;  $M = 2.420(2) \times 10^{-5} \text{ mol l}^{-1}$ ].

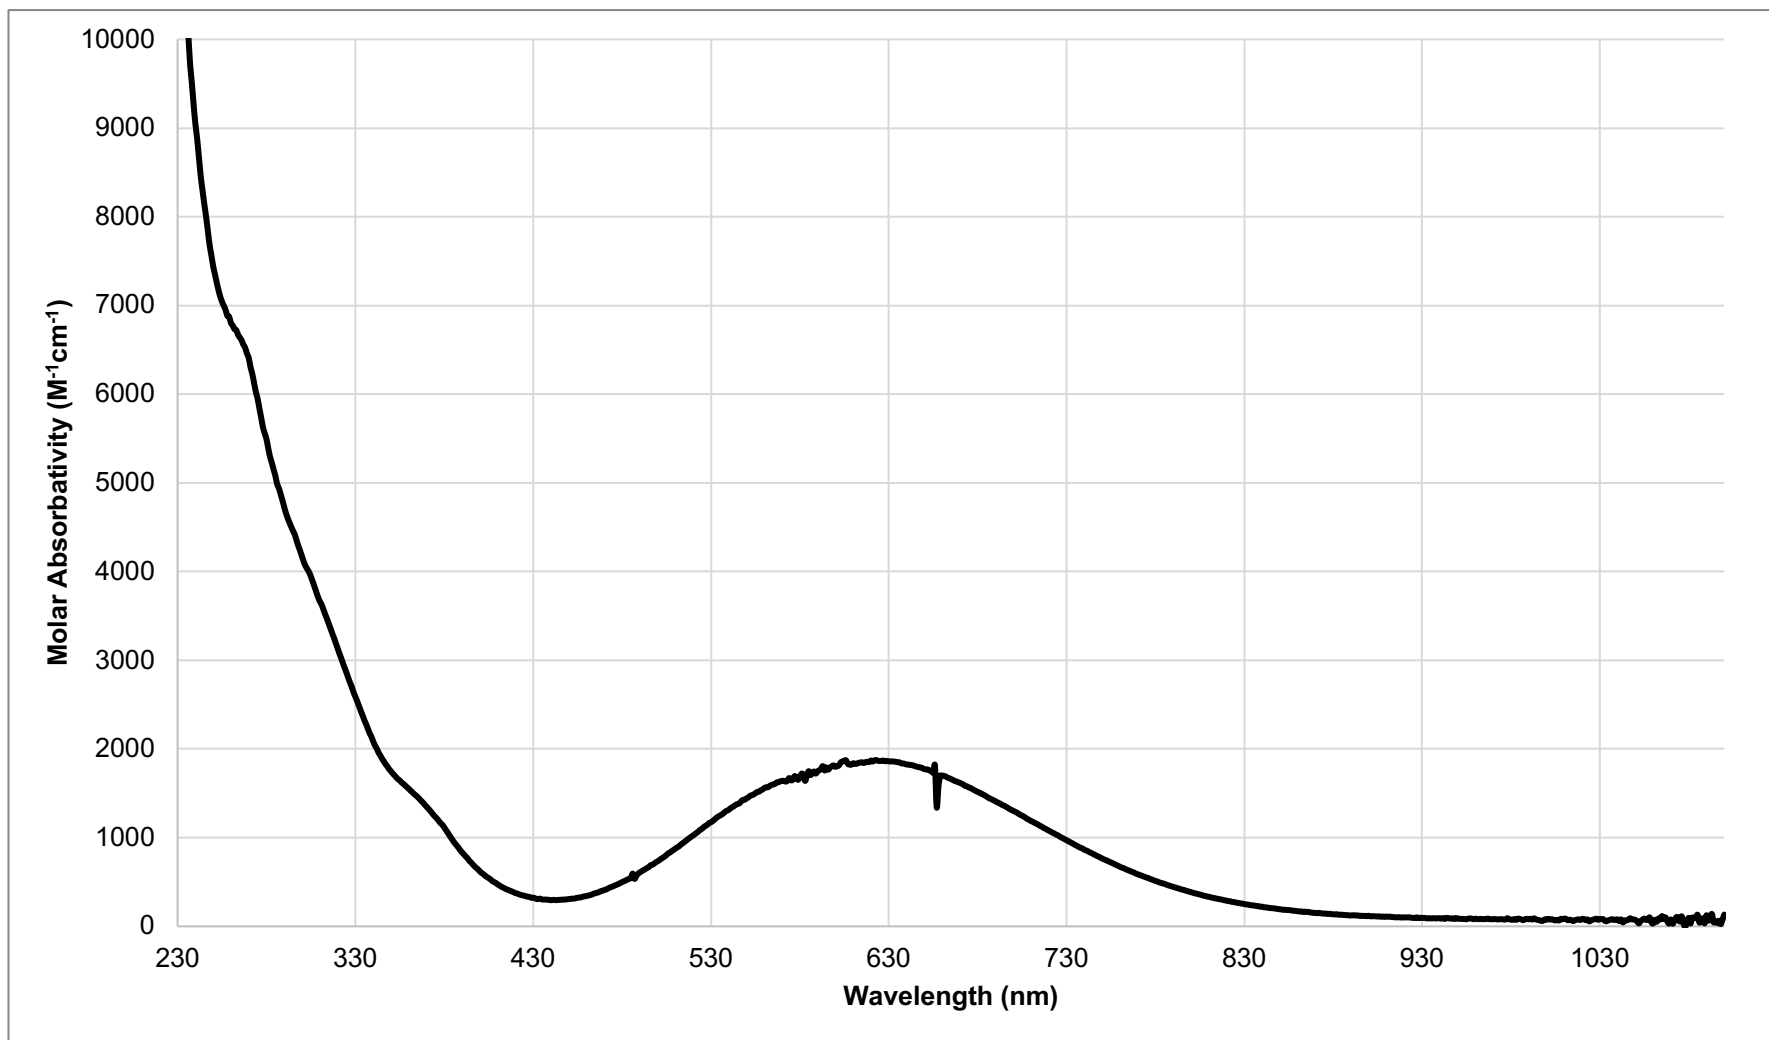

Figure S31: Electronic spectrum of  $[W(SCPPH_3)(CO)_2(Tp^*)].PF_6 \cdot 2(C_4H_4O)$  in  $CH_2Cl_2$  [2a;  $M = 2.420(2) \times 10^{-4} \text{ molL}^{-1}$ ].

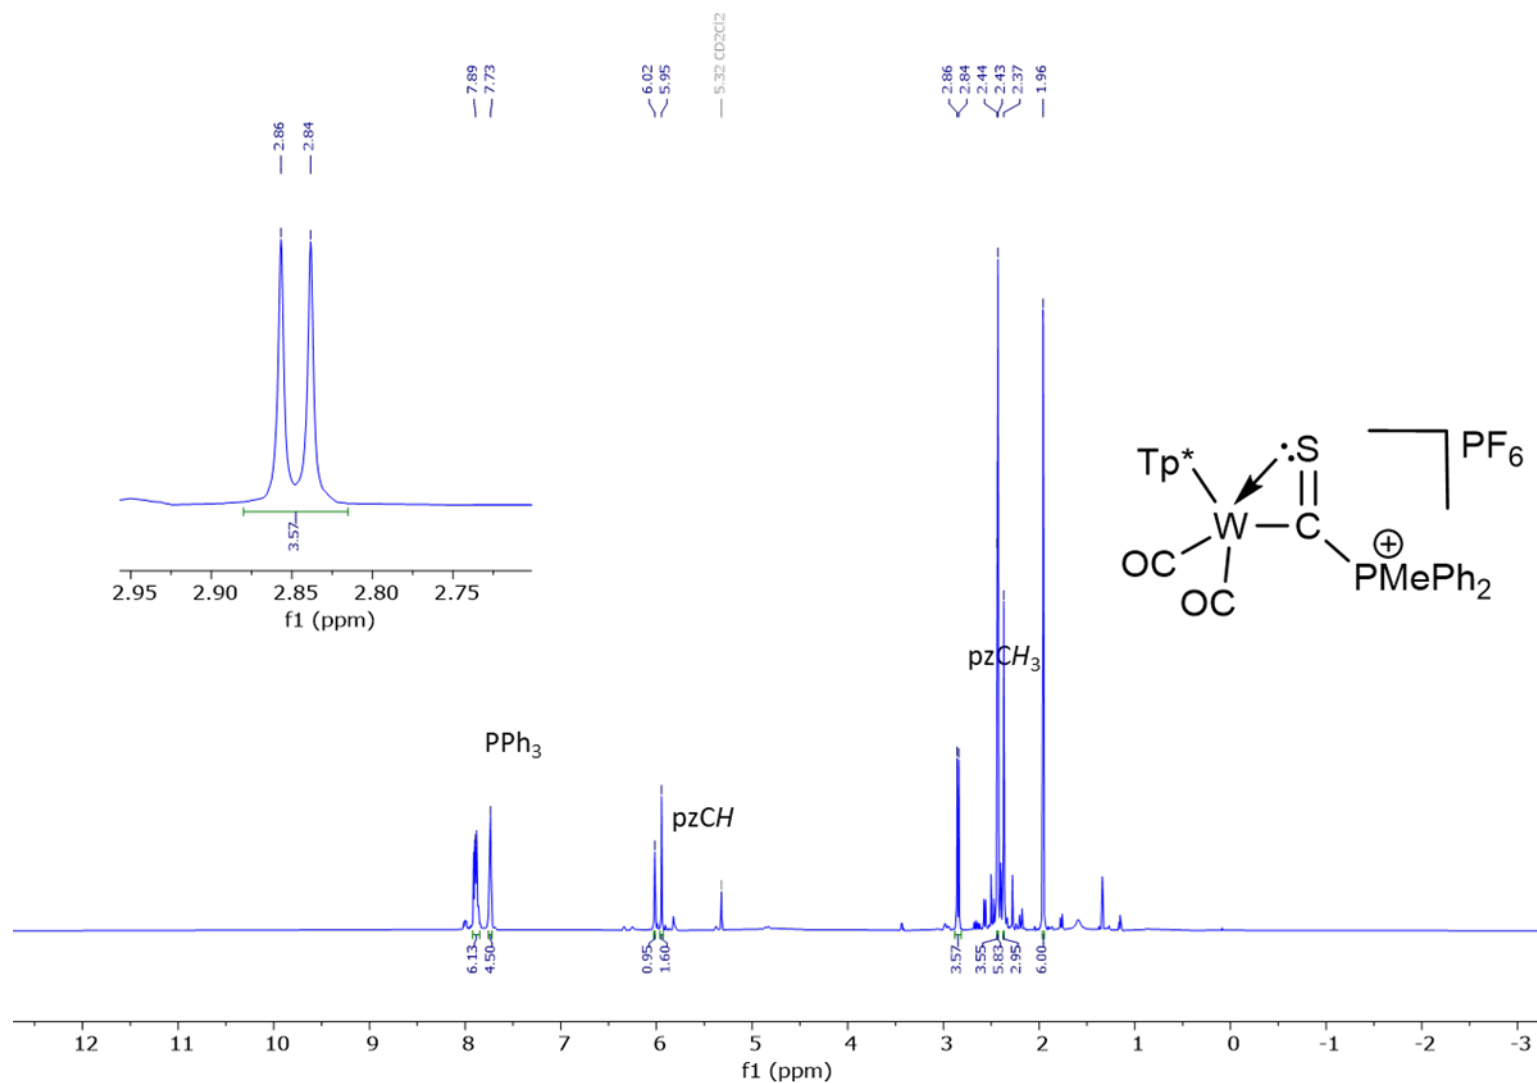

Figure S32:  $^1\text{H}$  NMR Spectrum of  $[\text{W}(\text{SCPMePh}_2)(\text{CO})_2(\text{Tp}^*)]\text{PF}_6$  (2b; 700 MHz,  $\text{CD}_2\text{Cl}_2$ , 25  $^\circ\text{C}$ ,  $\delta$ ):



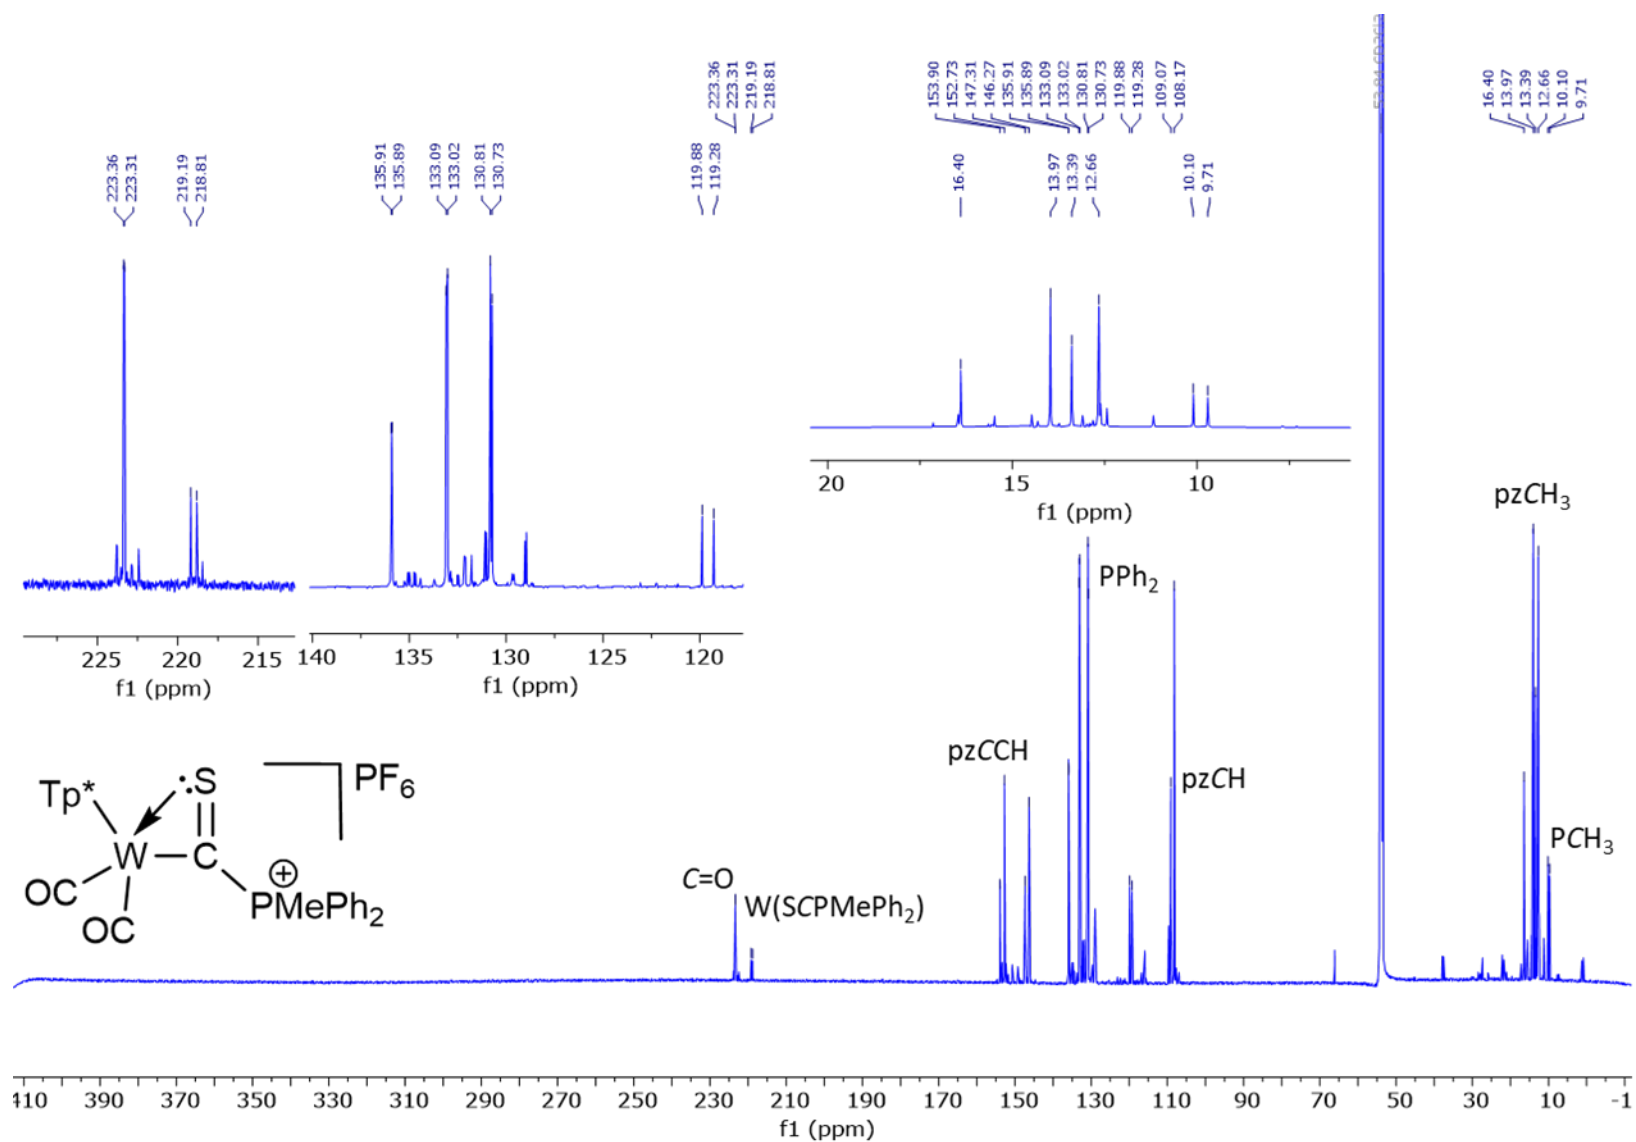

Figure S33:  $^{13}\text{C}\{^1\text{H}\}$  NMR Spectrum of  $[\text{W}(\text{SCPMePh}_2)(\text{CO})_2(\text{Tp}^*)]\text{PF}_6$  (2b; 151 MHz,  $\text{CD}_2\text{Cl}_2$ ,  $25^\circ\text{C}$ ,  $\delta$ )

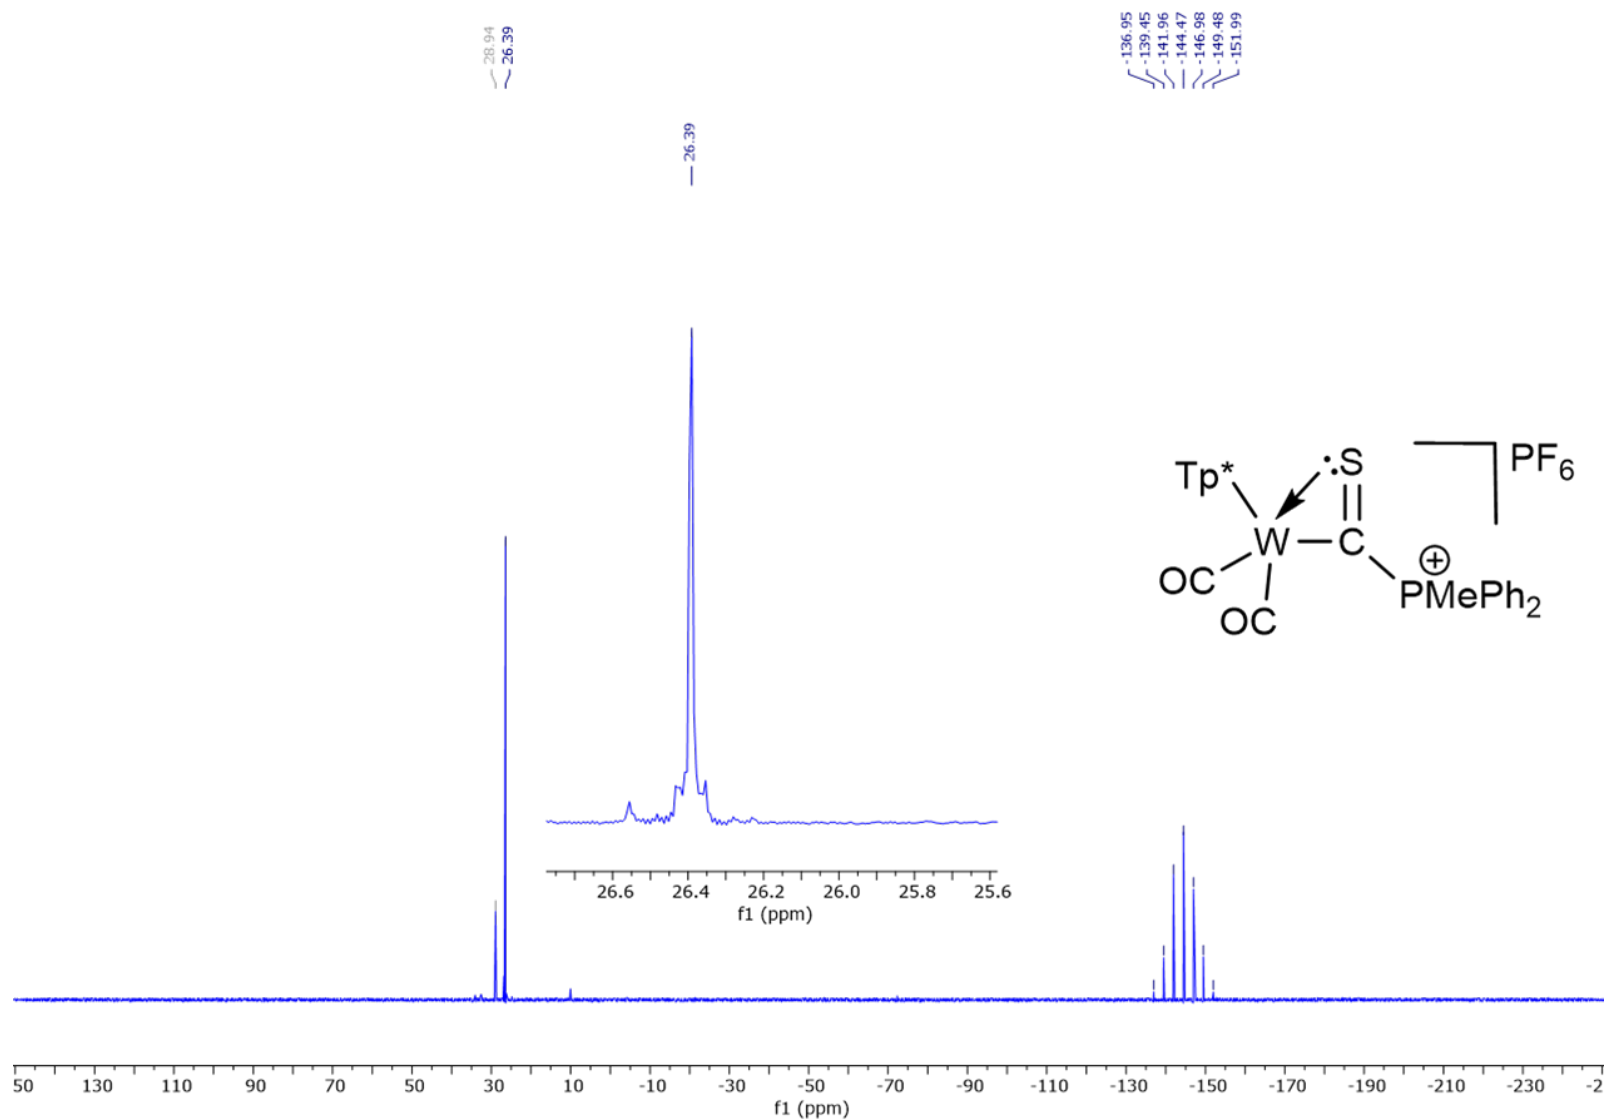

Figure S34:  $^{31}\text{P}\{^1\text{H}\}$  NMR Spectrum of  $[\text{W}(\text{SCPMePh}_2)(\text{CO})_2(\text{Tp}^*)]\text{PF}_6$  (2b, 283 MHz,  $\text{CD}_2\text{Cl}_2$ , 25 °C,  $\delta$ )

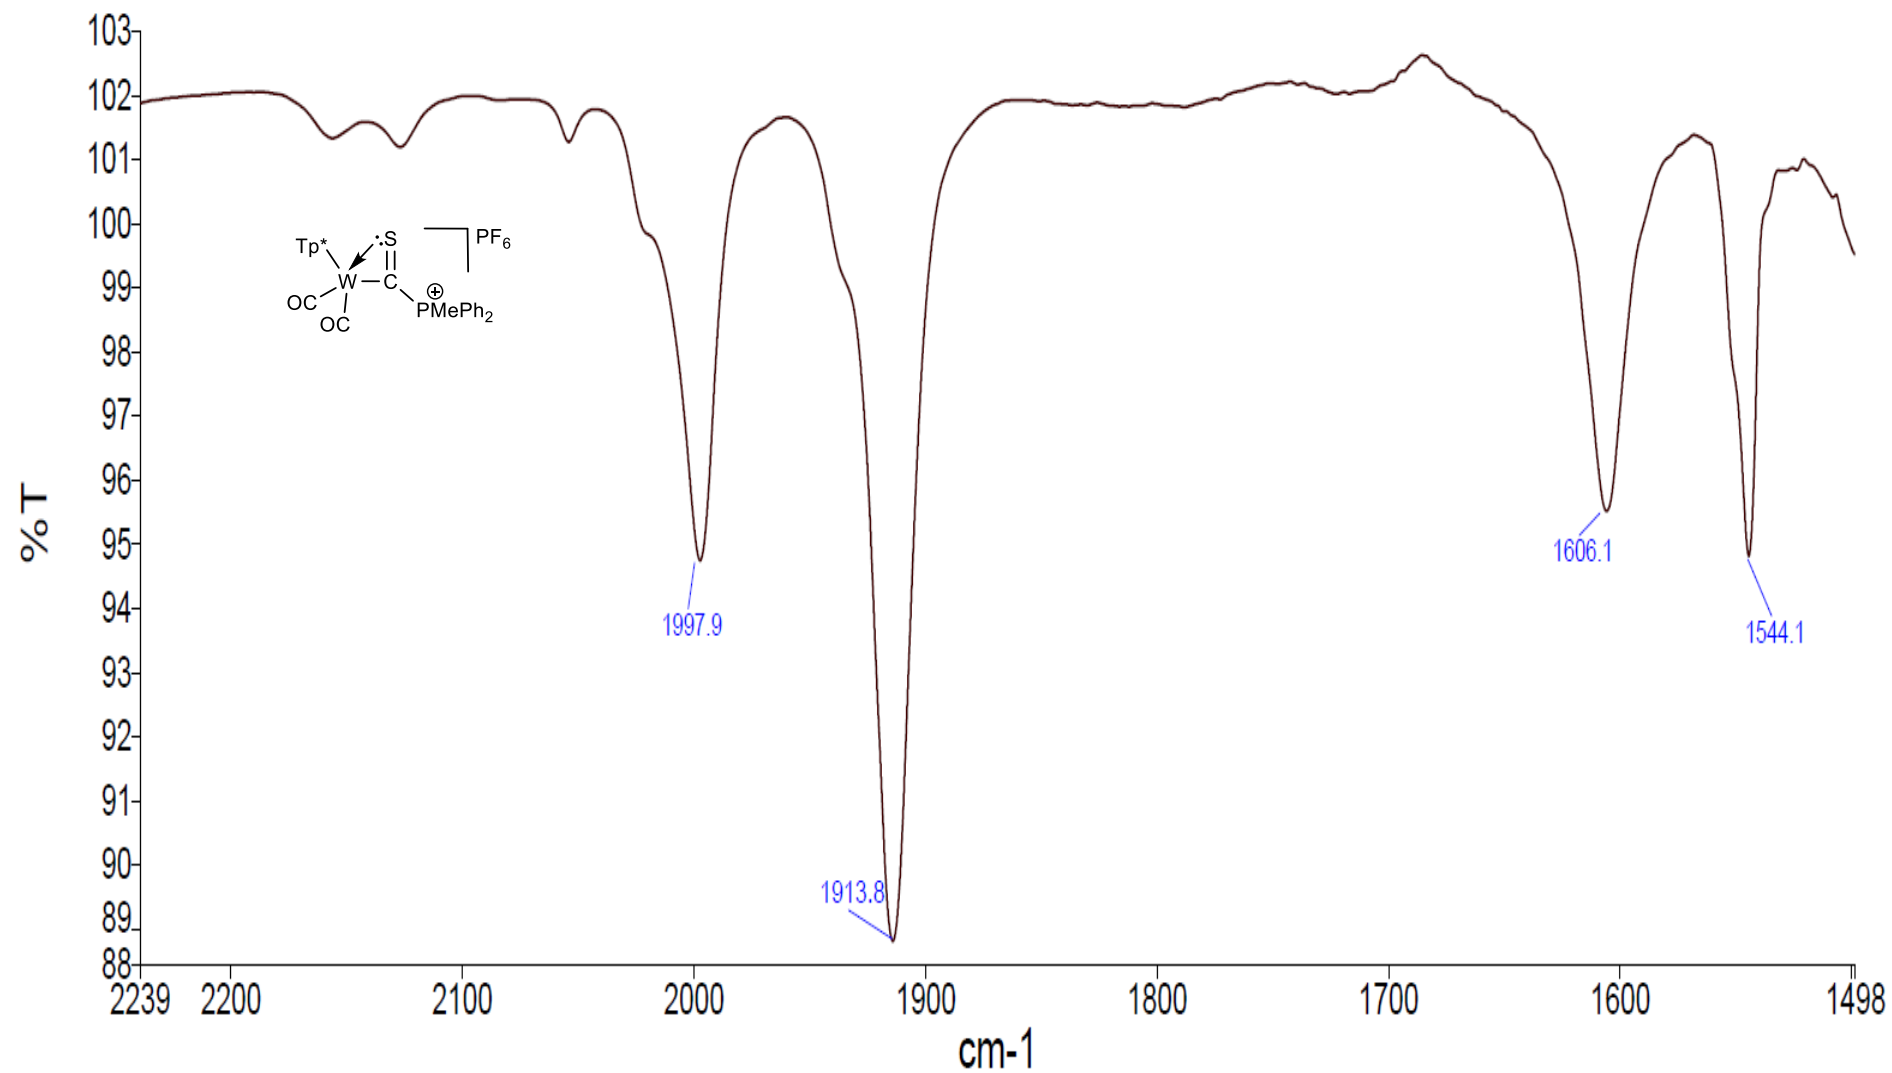

Figure S35: Infrared Spectrum of  $[W(SCPMePh_2)(CO)_2(Tp^*)]PF_6$  (2b;  $CH_2Cl_2$ , 25 °C, v)

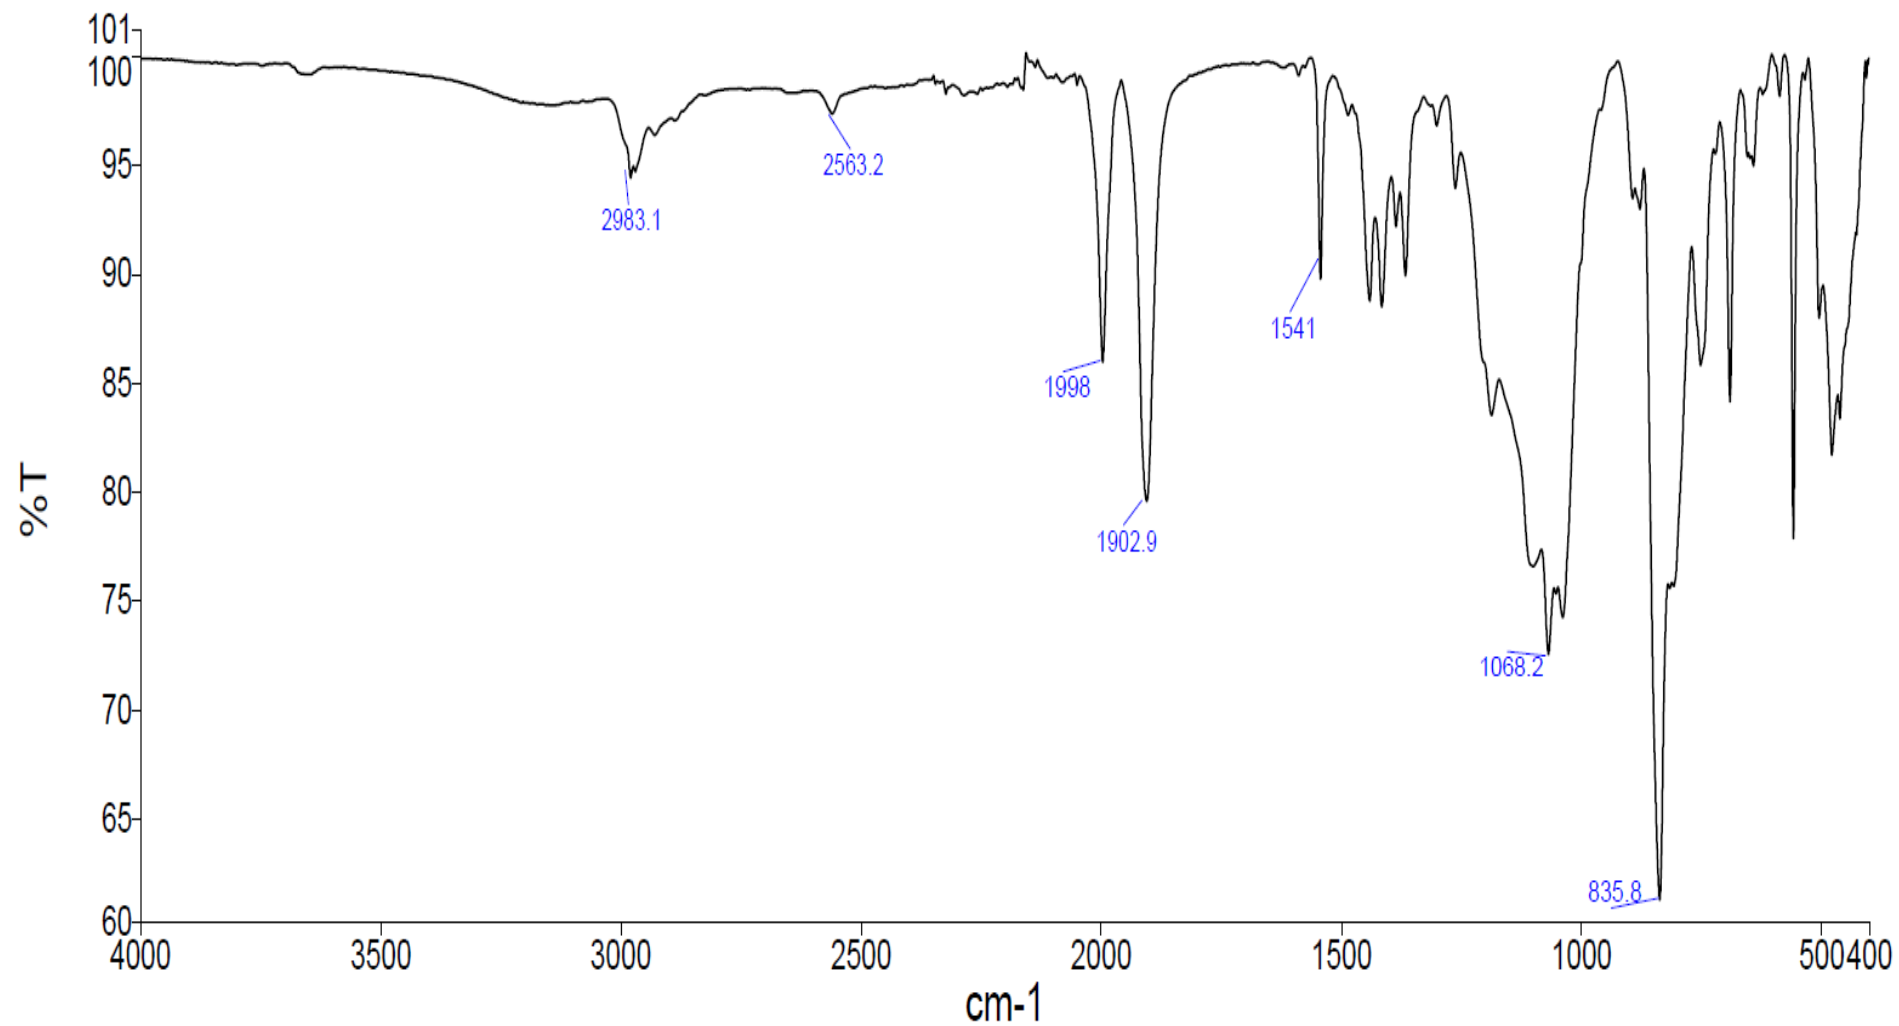

Figure S36: Infrared Spectrum of  $[W(SCPMePh_2)(CO)_2(Tp^*)]PF_6$  (2b; ATR, 25 °C,  $\nu$ )

## Elemental Composition Report

Page 1

## Multiple Mass Analysis: 2 mass(es) processed

Tolerance = 3.0 PPM / DBE: min = -1.5, max = 20.0

Element prediction: Off

Number of isotope peaks used for i-FIT = 2

Monoisotopic Mass, Odd and Even Electron Ions

1670 formula(e) evaluated with 1 results within limits (all results (up to 1000) for each mass)

Elements Used:

C: 0-50 H: 0-50 11B: 0-1 N: 0-6 O: 0-2 P: 0-1 S: 0-1 184W: 0-1

SJ-1-9/AJ

SYNAPTG2-Si#NotSet

09-Feb-2022

66949

10:35:20

2035 95 (0.209) Cm (95:120)

1: TOF MS ES+

1.70e+007

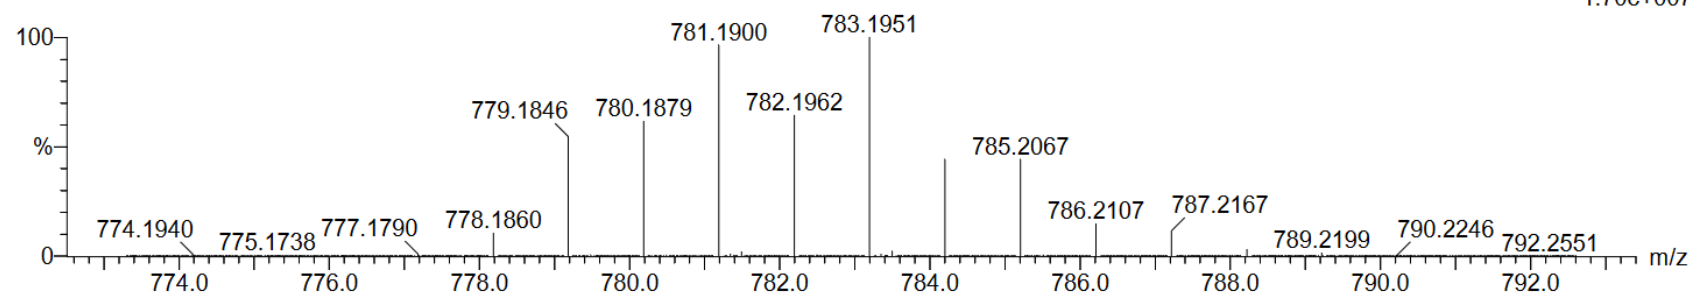

Minimum: 90.00  
 Maximum: 100.00

| Mass     | RA     | Calc. Mass | mDa | PPM | DBE  | i-FIT  | Formula                    |
|----------|--------|------------|-----|-----|------|--------|----------------------------|
| 781.1900 | 96.53  | 781.1882   | 1.8 | 2.3 | 20.0 | 1595.4 | C31 H35 11B N6 O2 P S 184W |
| 783.1951 | 100.00 | ---        |     |     |      |        |                            |

Figure S37: Mass Spectrum (ESI, +ve ion) of  $[W(SCPMePh_2)(CO)_2(Tp^*)]PF_6$  (2b)

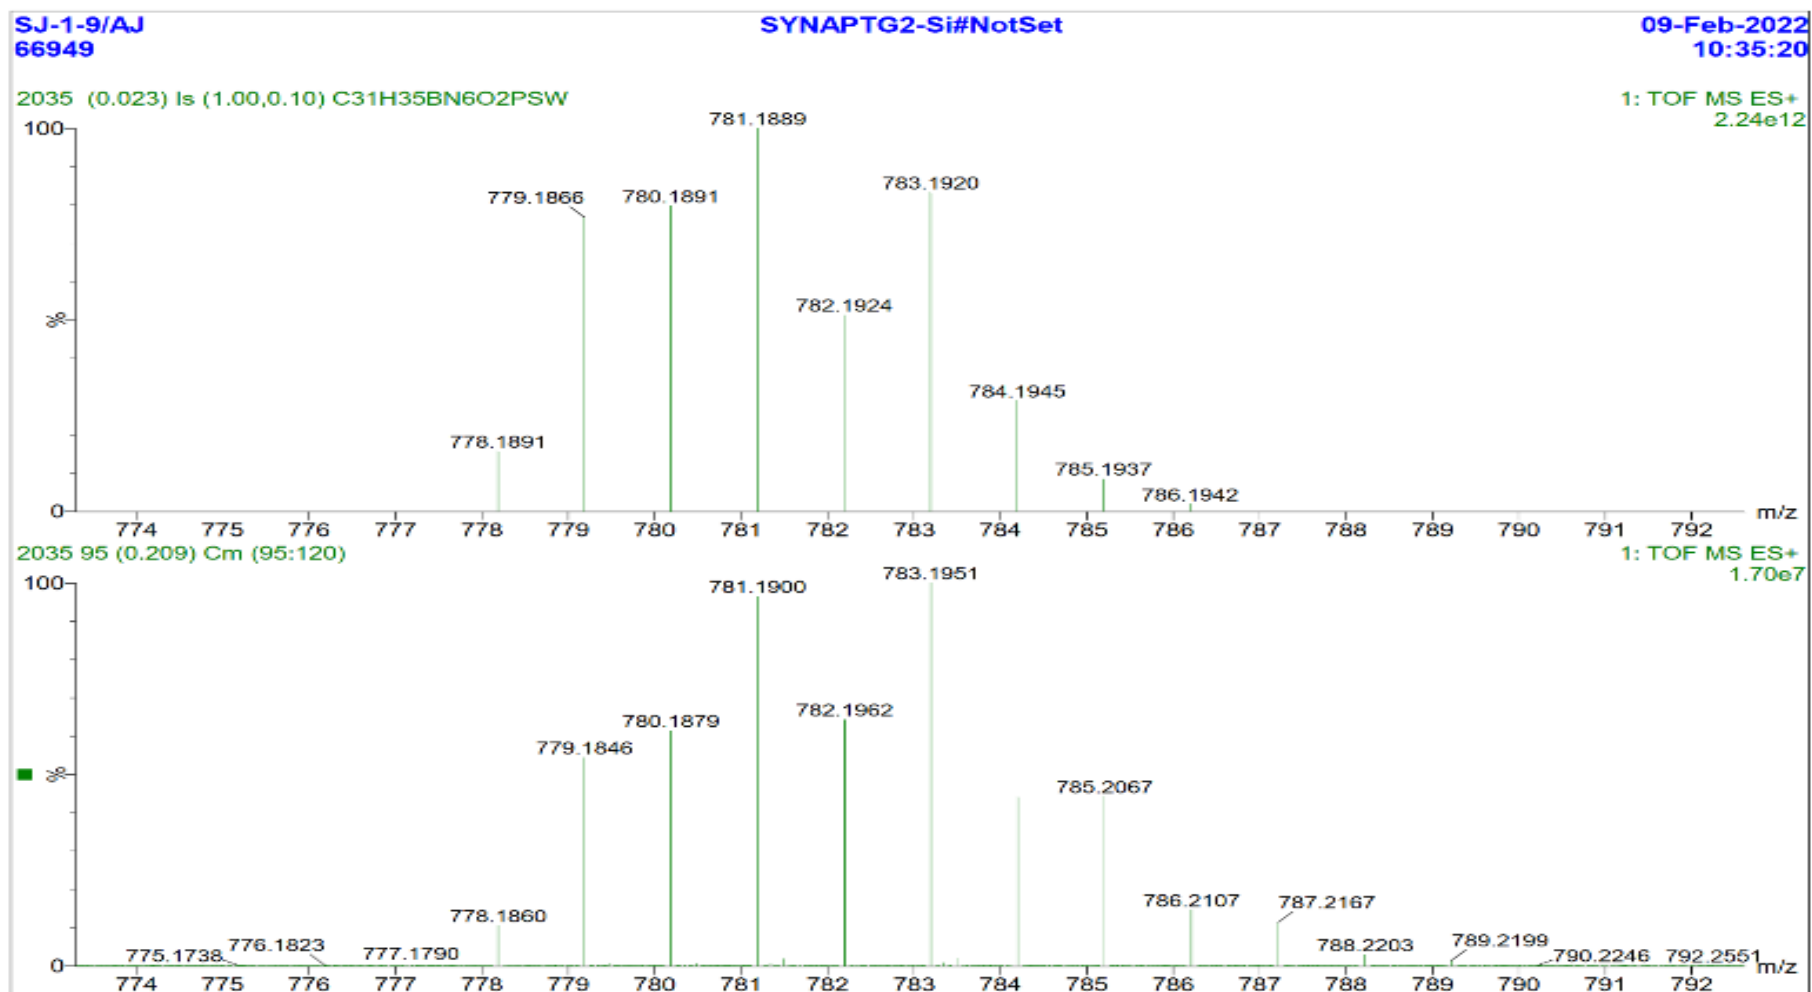

Figure S38: Mass Spectrum (ESI, +ve ion) of  $[W(SCPMePh_2)(CO)_2(Tp^*)]PF_6$  (2b)

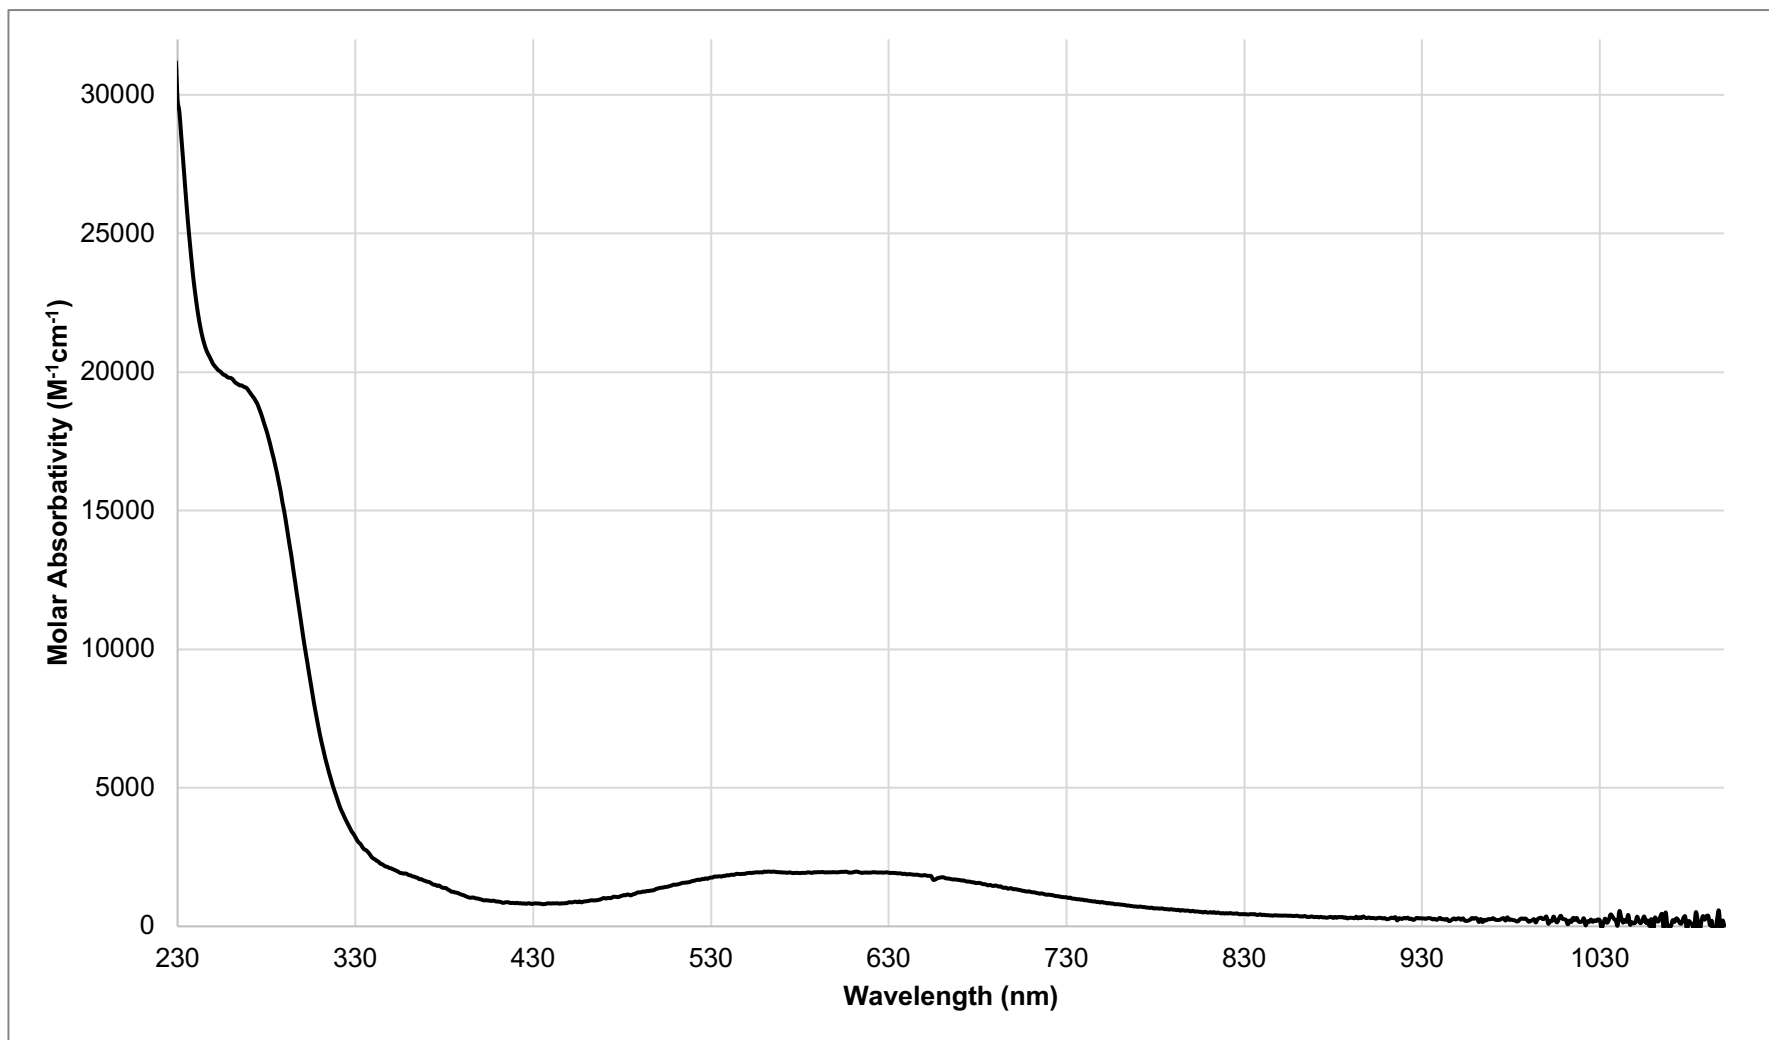

Figure S39: Electronic spectrum of  $[W(SCPMePh_2)(CO)_2(Tp^*)].PF_6$  in  $CH_2Cl_2$  [2b;  $M = 2.610(3) \times 10^{-5} \text{ molL}^{-1}$ ].

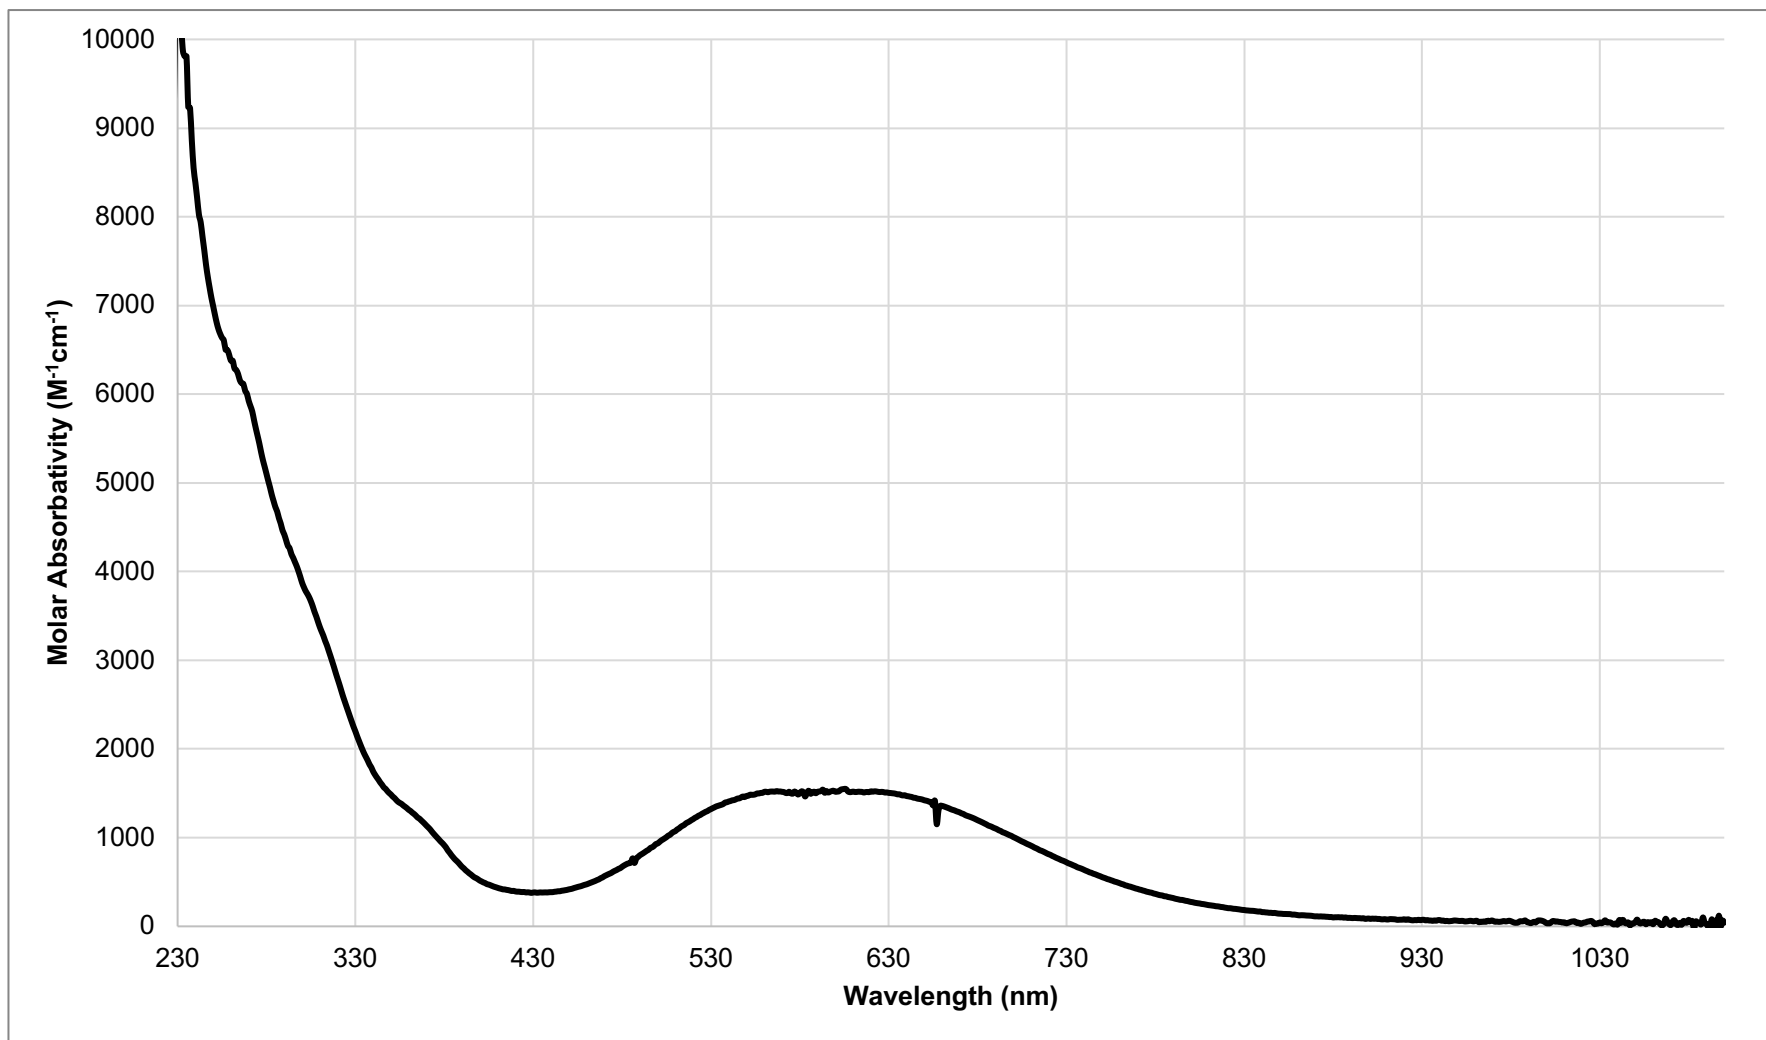

Figure S40: Electronic spectrum of  $[W(SCPMePh_2)(CO)_2(Tp^*)].PF_6$  in  $CH_2Cl_2$  [2b;  $M = 2.610(3) \times 10^{-4} \text{ molL}^{-1}$ ].



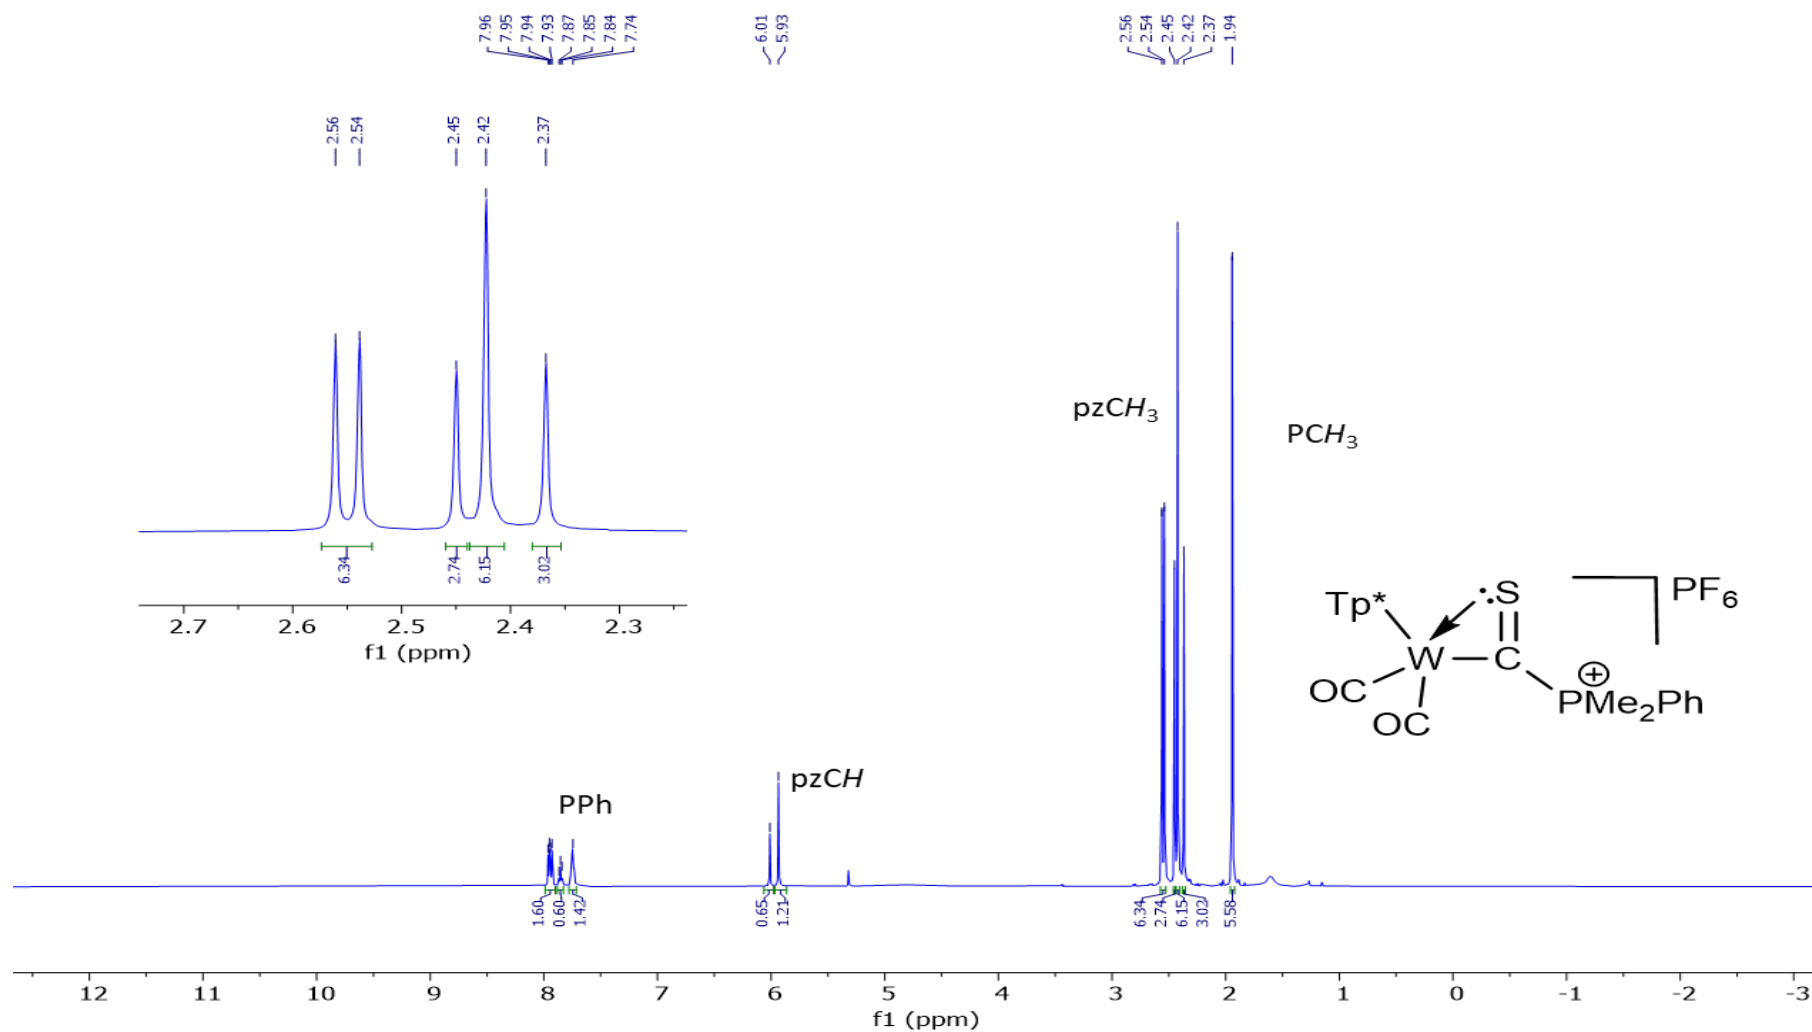

Figure S41:  $^1\text{H}$  NMR Spectrum of  $[\text{W}(\text{SCPMe}_2\text{Ph})(\text{CO})_2(\text{Tp}^*)]\text{PF}_6$  (2c; 600 MHz,  $\text{CD}_2\text{Cl}_2$ ,  $25^\circ\text{C}$ ,  $\delta$ )

## ELECTRONIC SUPPORTING INFORMATION

## Chemical Communications

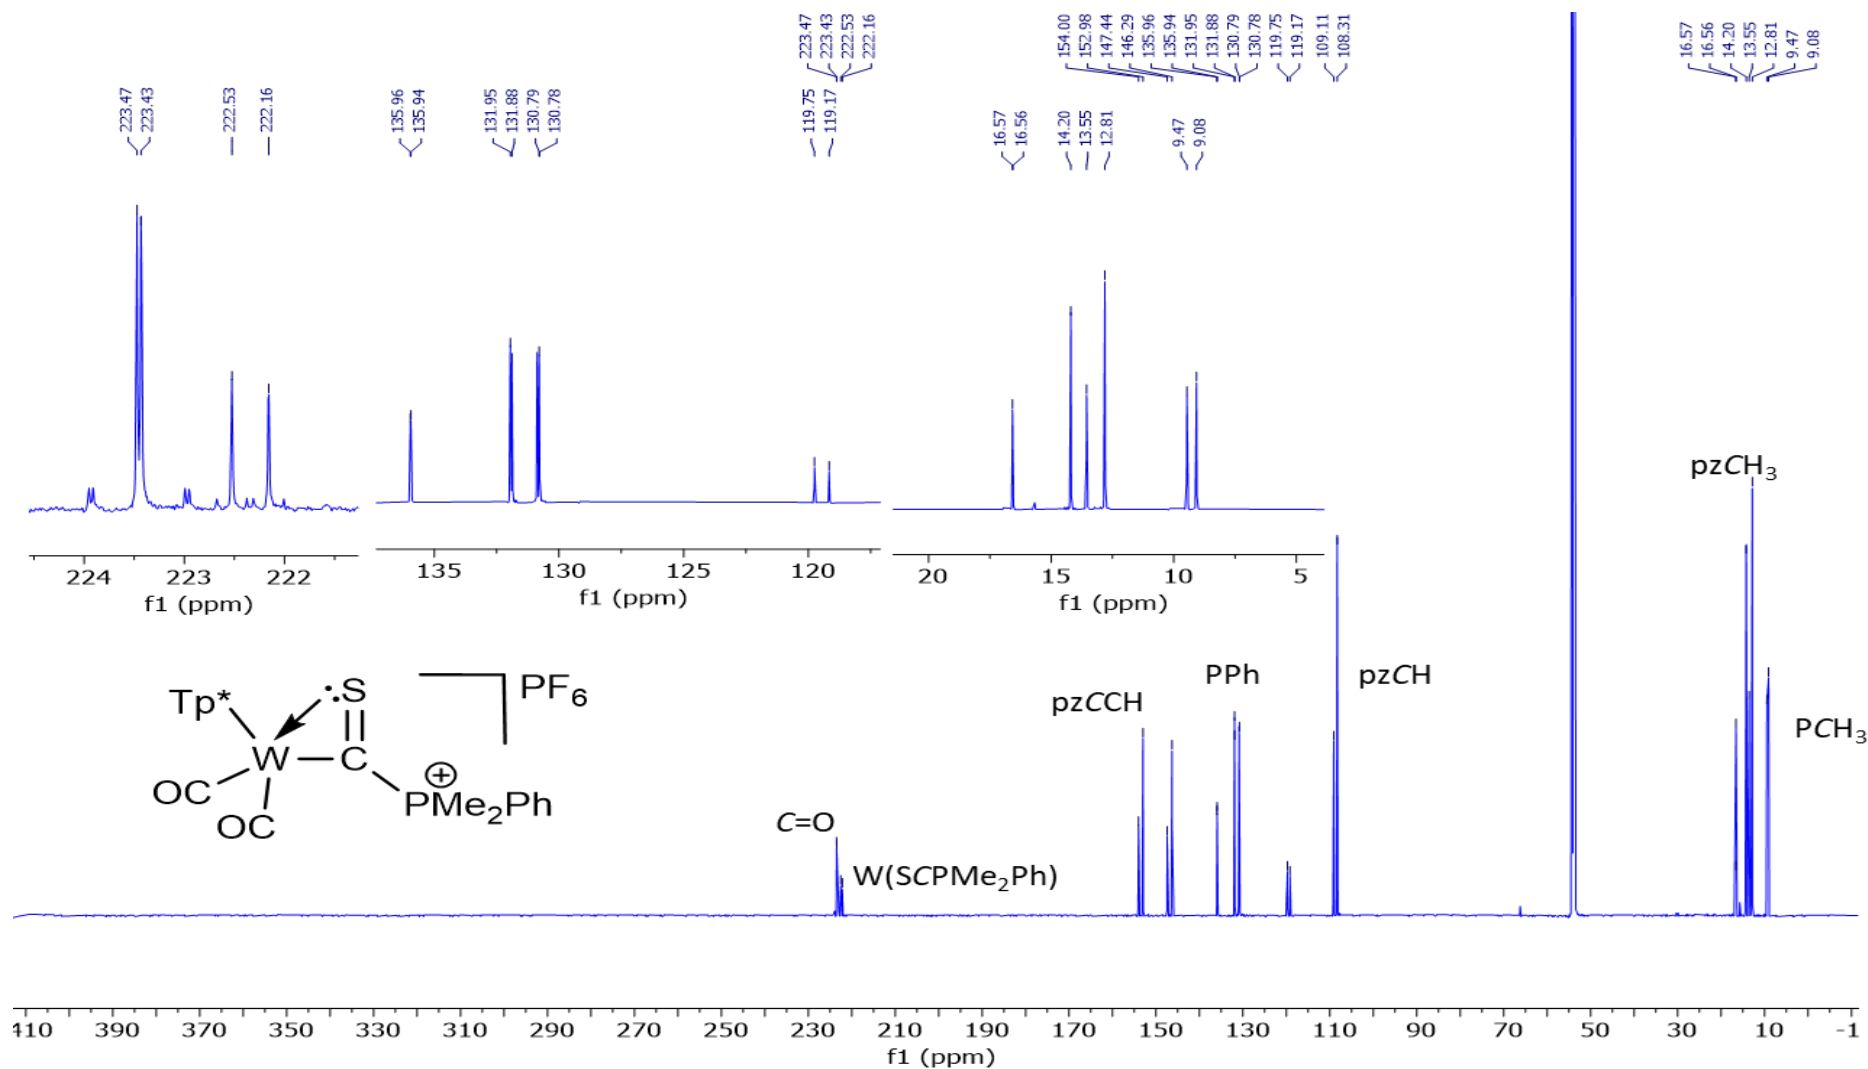Figure S42: <sup>13</sup>C{<sup>1</sup>H} NMR Spectrum of [W(SCPMe<sub>2</sub>Ph)(CO)<sub>2</sub>(Tp\*)]PF<sub>6</sub> (151 MHz, CD<sub>2</sub>Cl<sub>2</sub>, 25 °C, δ)

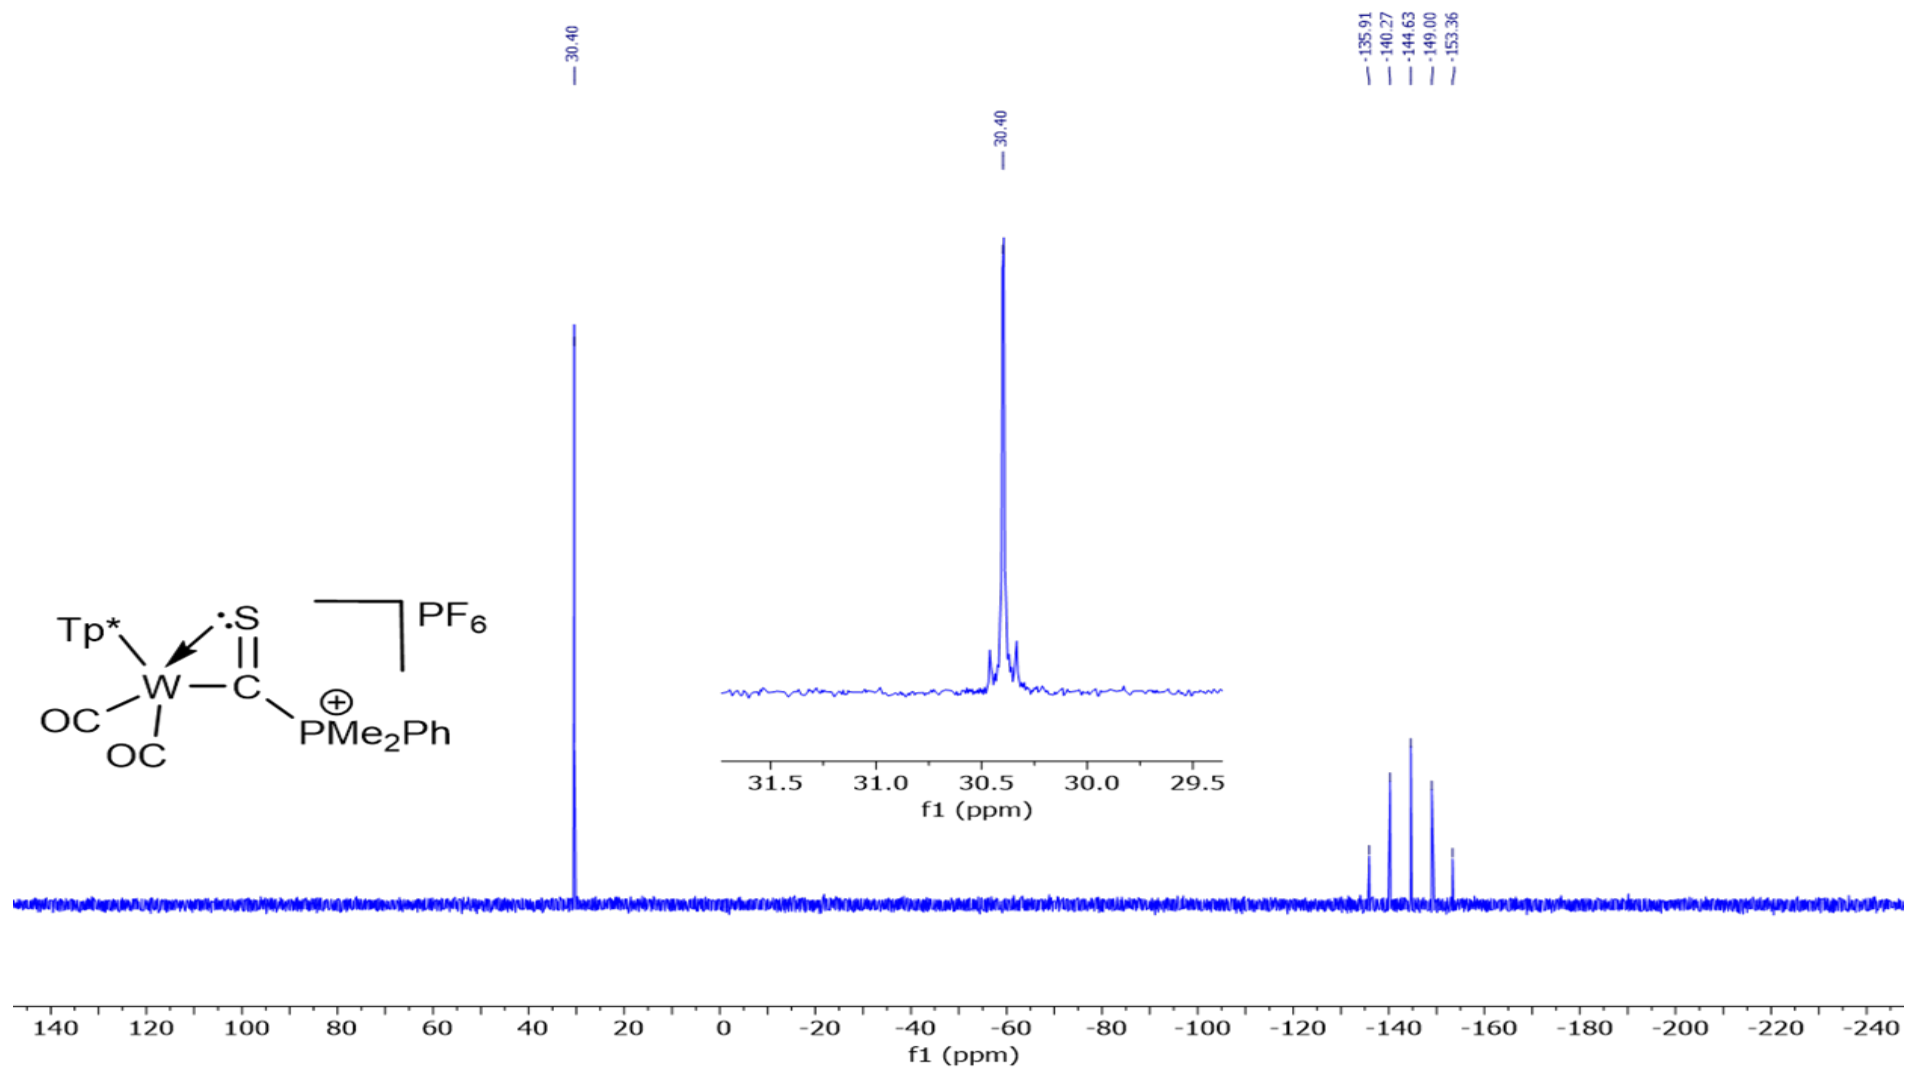

Figure S43:  $^{31}\text{P}\{^1\text{H}\}$  NMR Spectrum of  $[\text{W}(\text{SCPMe}_2\text{Ph})(\text{CO})_2(\text{Tp}^*)]\text{PF}_6$  (2c; 162 MHz,  $\text{CD}_3\text{CN}$ , 25 °C,  $\delta$ )

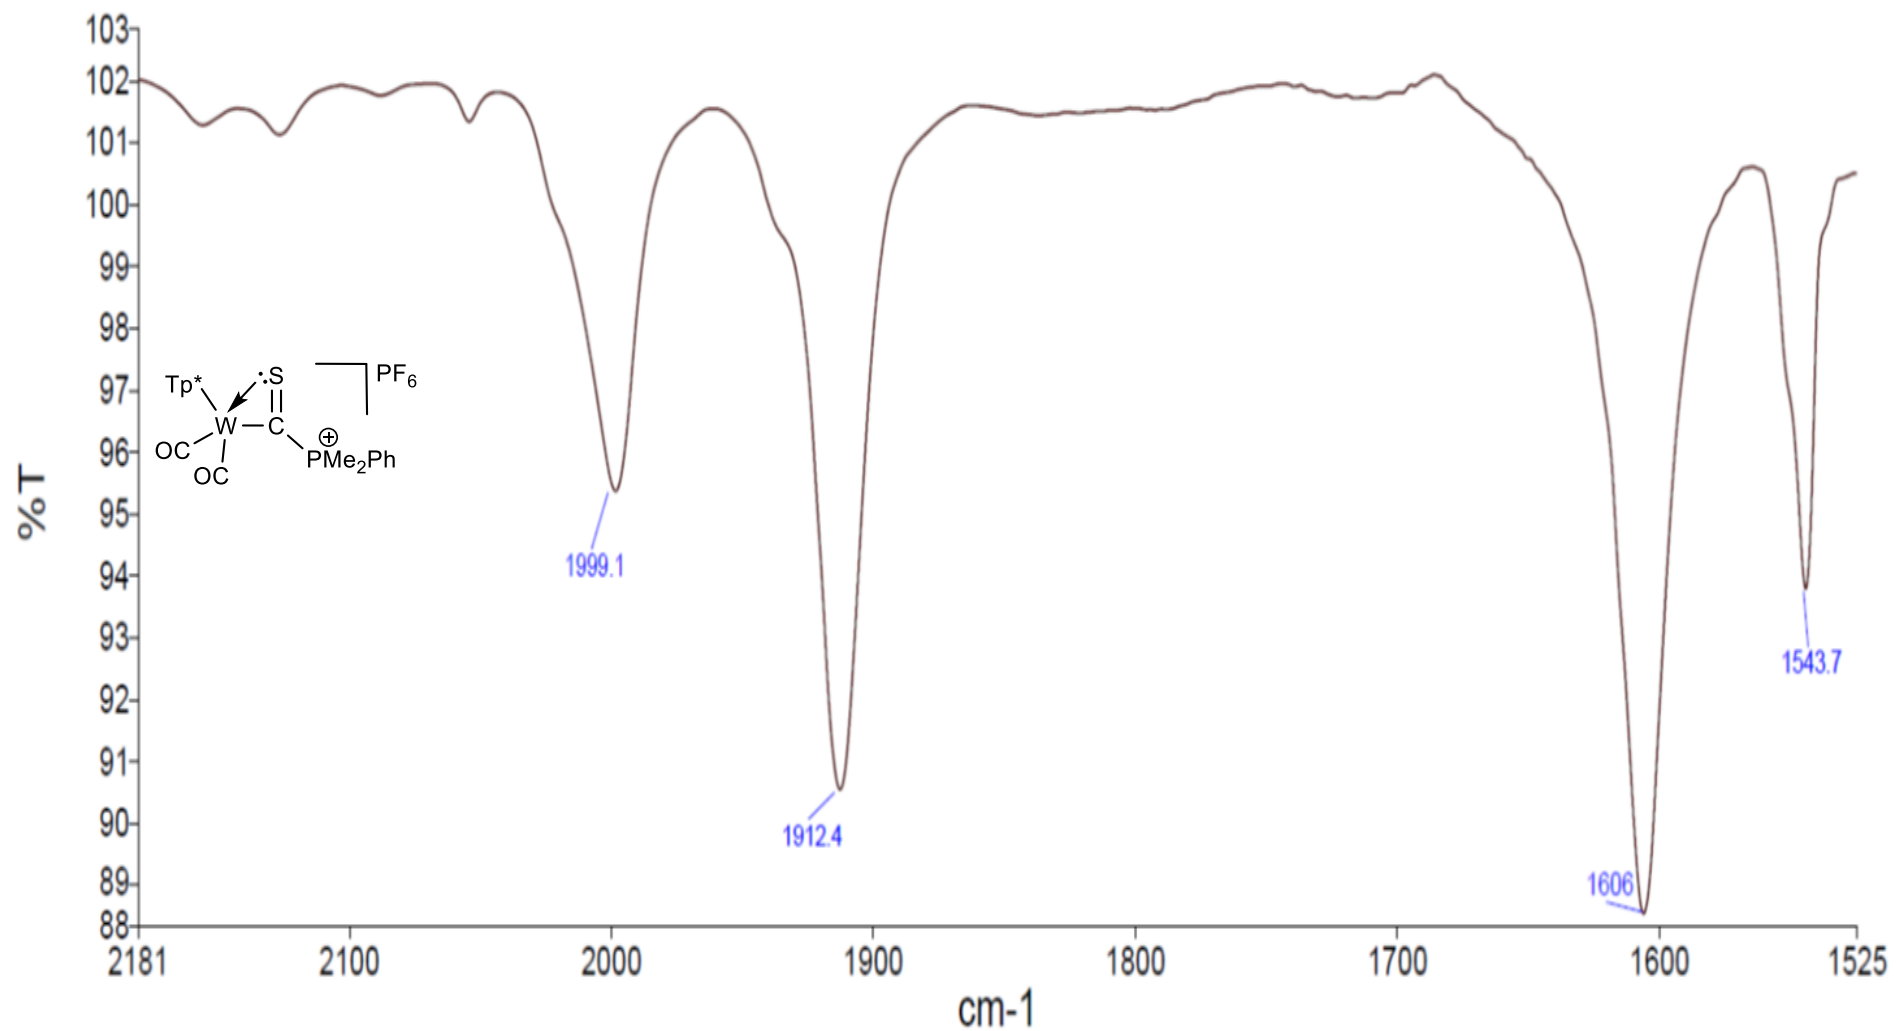

Figure S44: Infrared Spectrum of  $[W(SCPMe_2Ph)(CO)_2(Tp^*)]PF_6$  (2c;  $CH_2Cl_2$ , 25 °C, v)

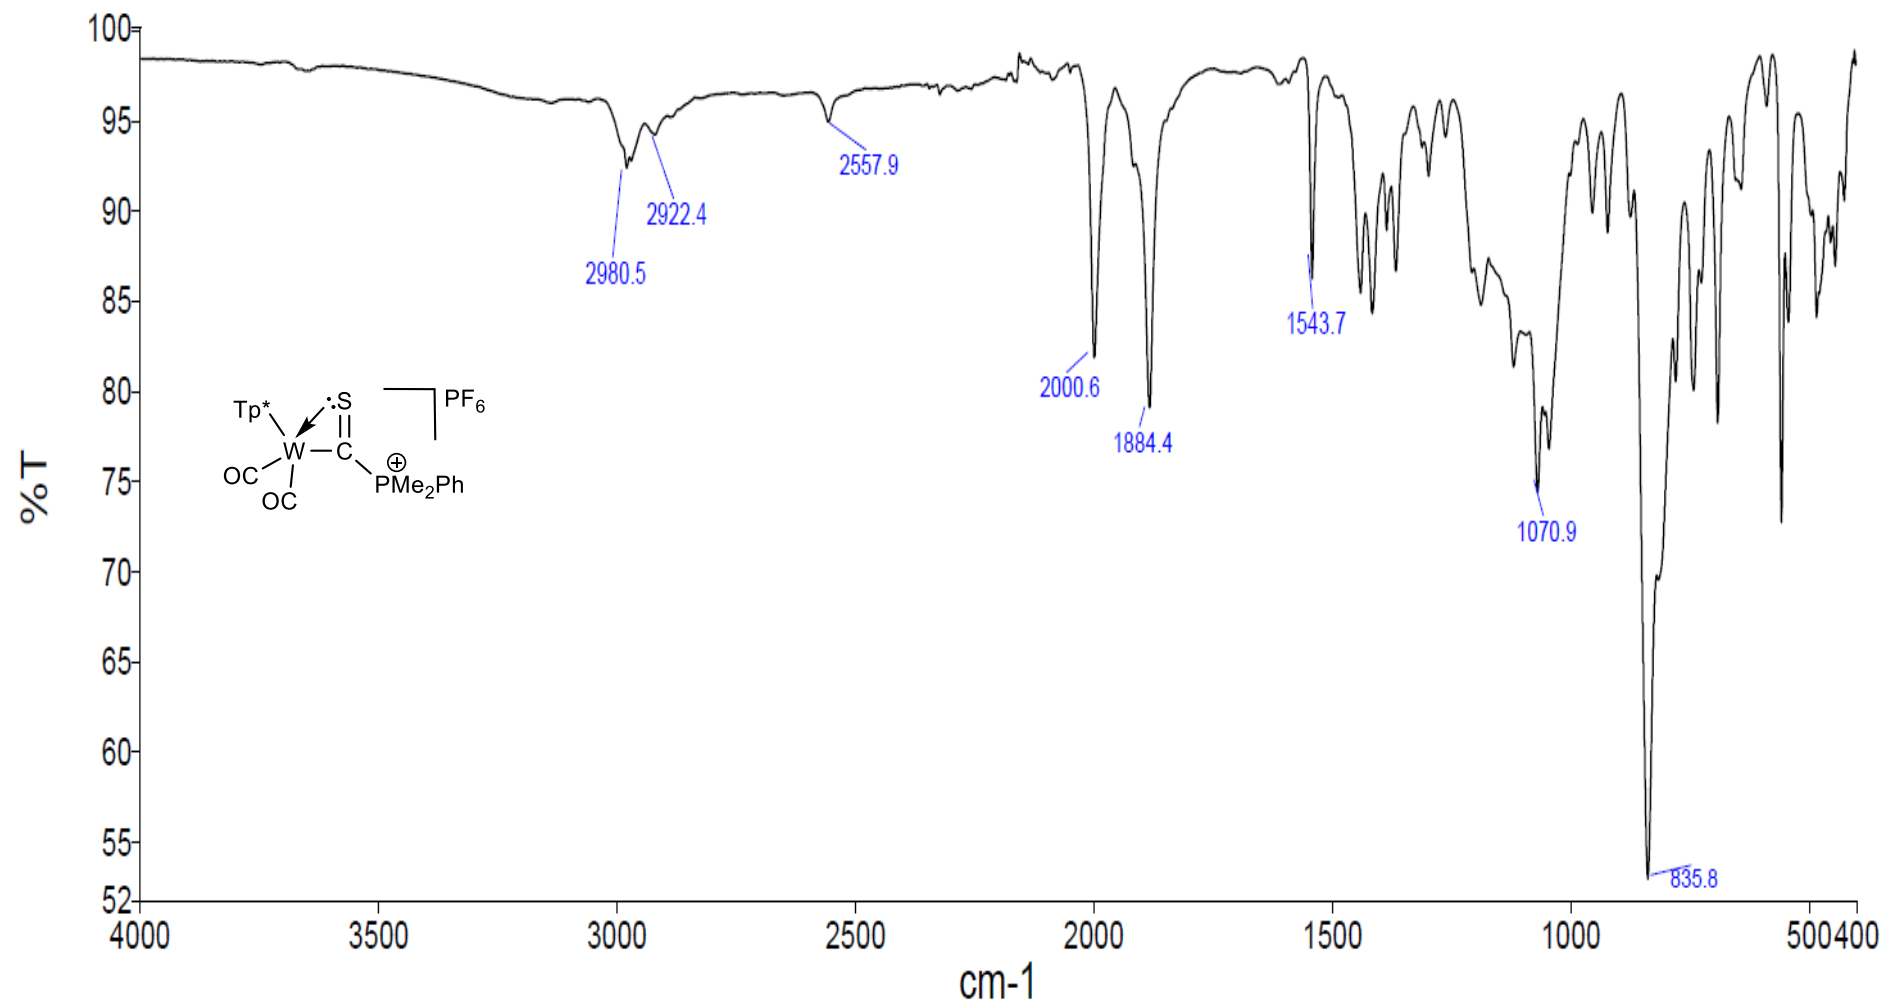

Figure S45: Infrared Spectrum of  $[W(SCPMe_2Ph)(CO)_2(Tp^*)]PF_6$  (2c; ATR, 25 °C, v)

## Elemental Composition Report

Page 1

Tolerance = 3.0 PPM / DBE: min = -1.5, max = 18.0  
 Element prediction: Off  
 Number of isotope peaks used for i-FIT = 2

Monoisotopic Mass, Odd and Even Electron Ions  
 1138 formula(e) evaluated with 1 results within limits (all results (up to 1000) for each mass)  
 Elements Used:  
 C: 0-50 H: 0-50 11B: 0-1 N: 0-6 O: 0-2 P: 0-1 S: 0-1 184W: 0-1

SJ-1-8/AJ  
 66947  
 2034 136 (0.287) Cm (133:147)  
 1: TOF MS ES+

SYNAPTG2-Si#NotSet

09-Feb-2022  
 10:12:15

1.59e+007

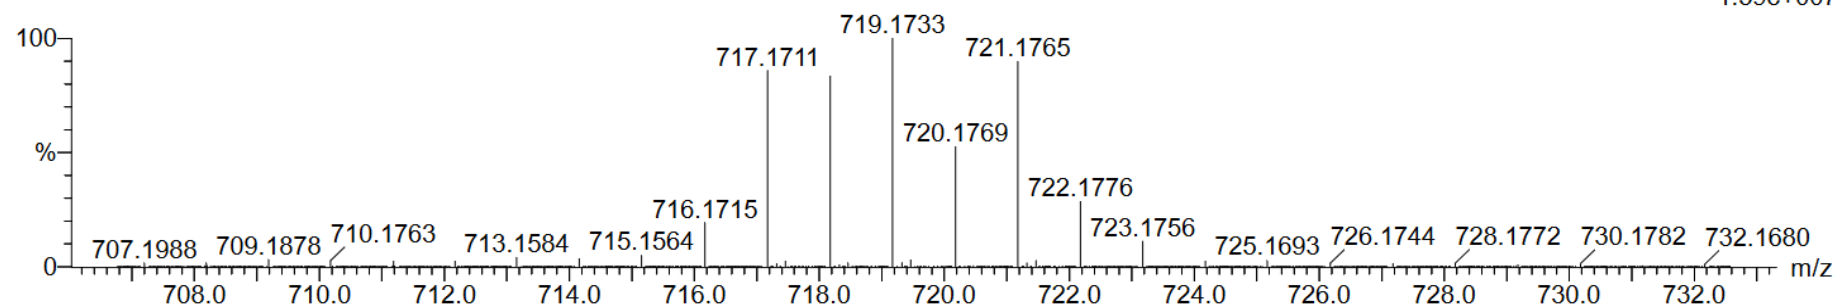

Minimum: 90.00 -1.5  
 Maximum: 100.00 25.0 3.0 18.0

| Mass     | RA     | Calc. Mass | mDa | PPM | DBE  | i-FIT | Norm | Conf (%) | Formula                                                                    |
|----------|--------|------------|-----|-----|------|-------|------|----------|----------------------------------------------------------------------------|
| 719.1733 | 100.00 | 719.1726   | 0.7 | 1.0 | 16.0 | 871.6 | n/a  | n/a      | C <sub>26</sub> H <sub>33</sub> 11B N <sub>6</sub> O <sub>2</sub> P S 184W |

Figure S46: Mass Spectrum (ESI, +ve ion) of  $[W(SCPMe_2Ph)(CO)_2(Tp^*)]PF_6$  (2c)

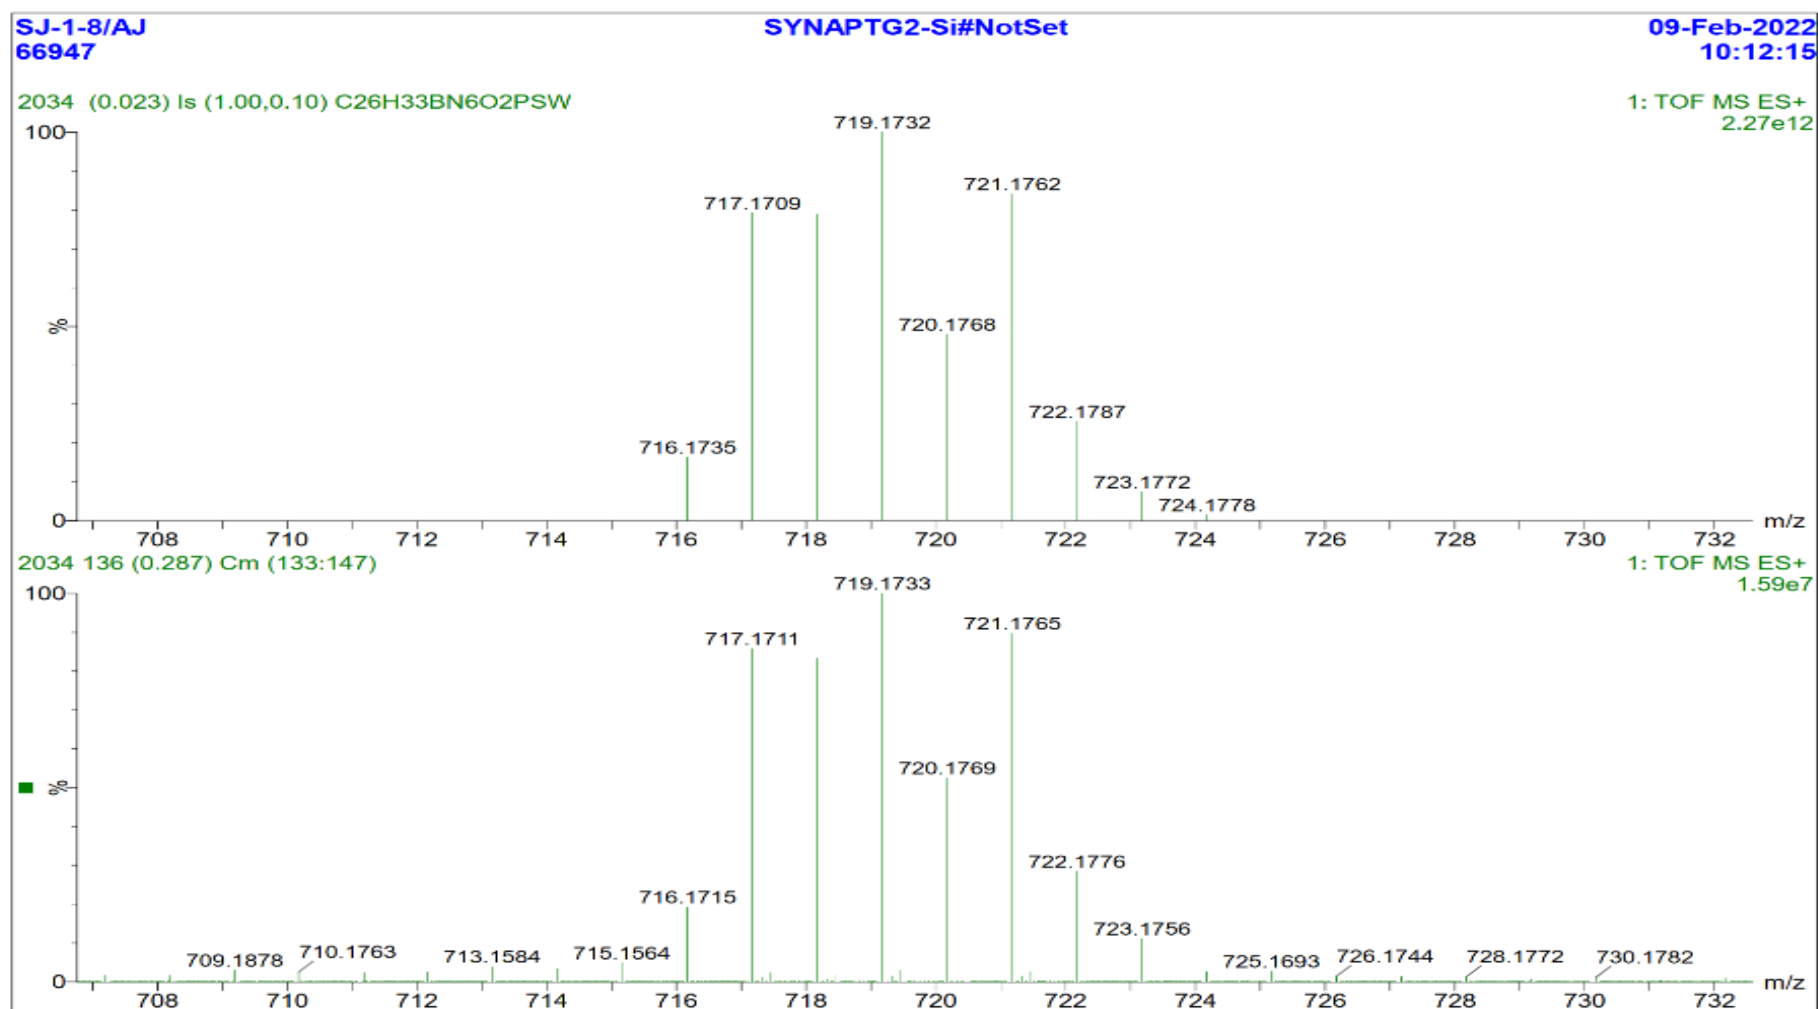

Figure S47: Mass Spectrum (ESI, +ve ion) of  $[W(SCPMe_2Ph)(CO)_2(Tp^*)]PF_6$  (2c)

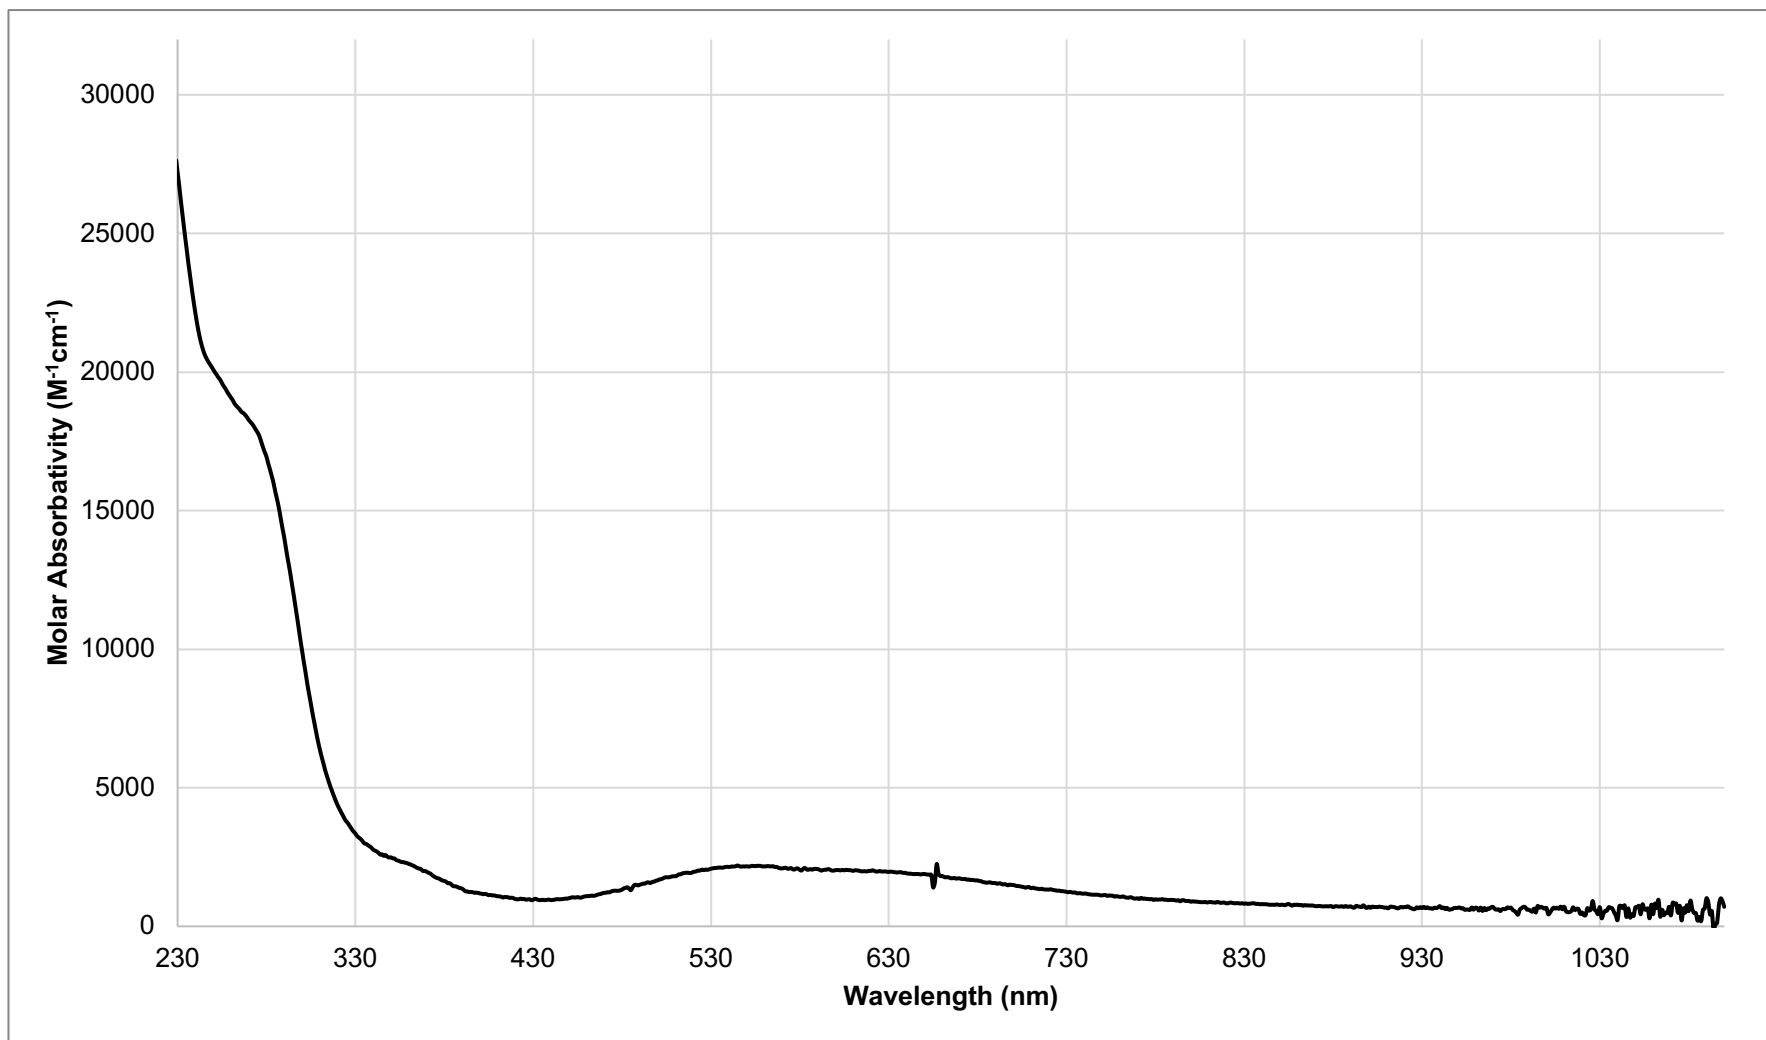

Figure S48: Electronic spectrum of  $[W(SCPMe_2Ph)(CO)_2(Tp^*)].PF_6$  in  $CH_2Cl_2$  [2c;  $M = 2.498(3) \times 10^{-5} \text{ molL}^{-1}$ ].



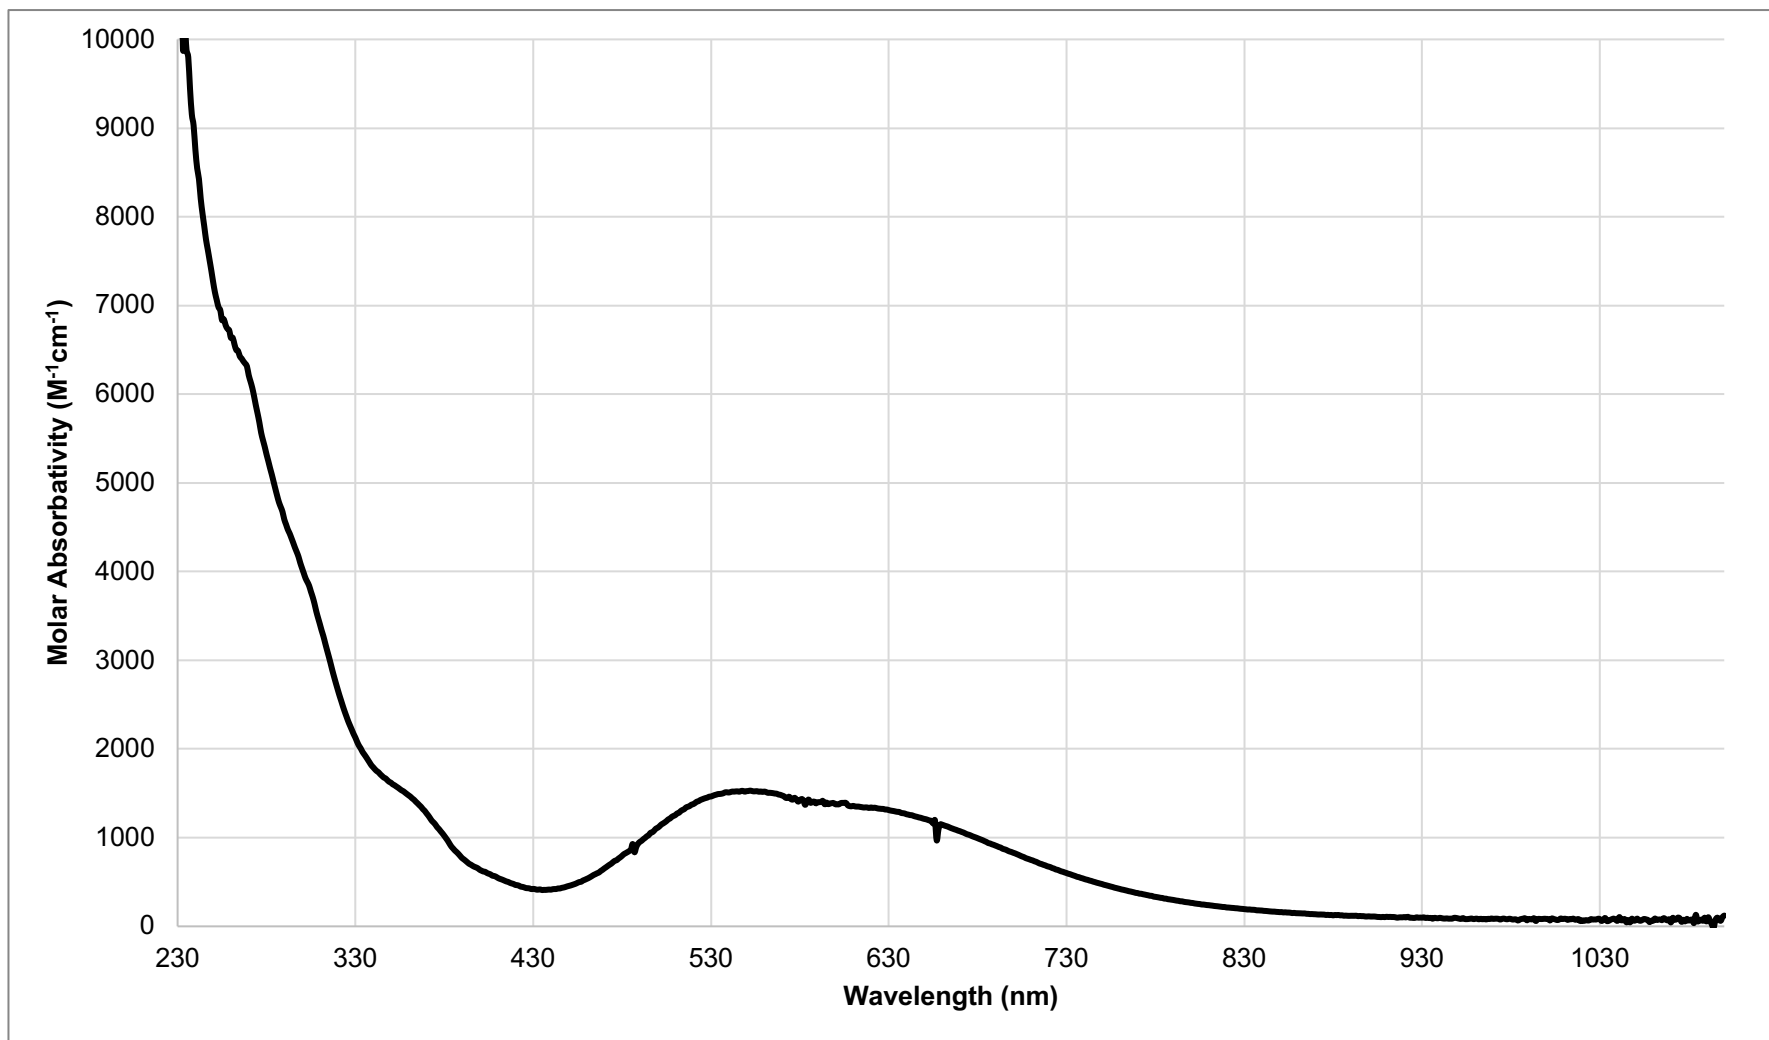

Figure S49: Electronic spectrum of  $[W(SCPMe_2Ph)(CO)_2(Tp^*)].PF_6^-$  in  $CH_2Cl_2$  [2c;  $M = 2.498(3) \times 10^{-4} molL^{-1}$ ].

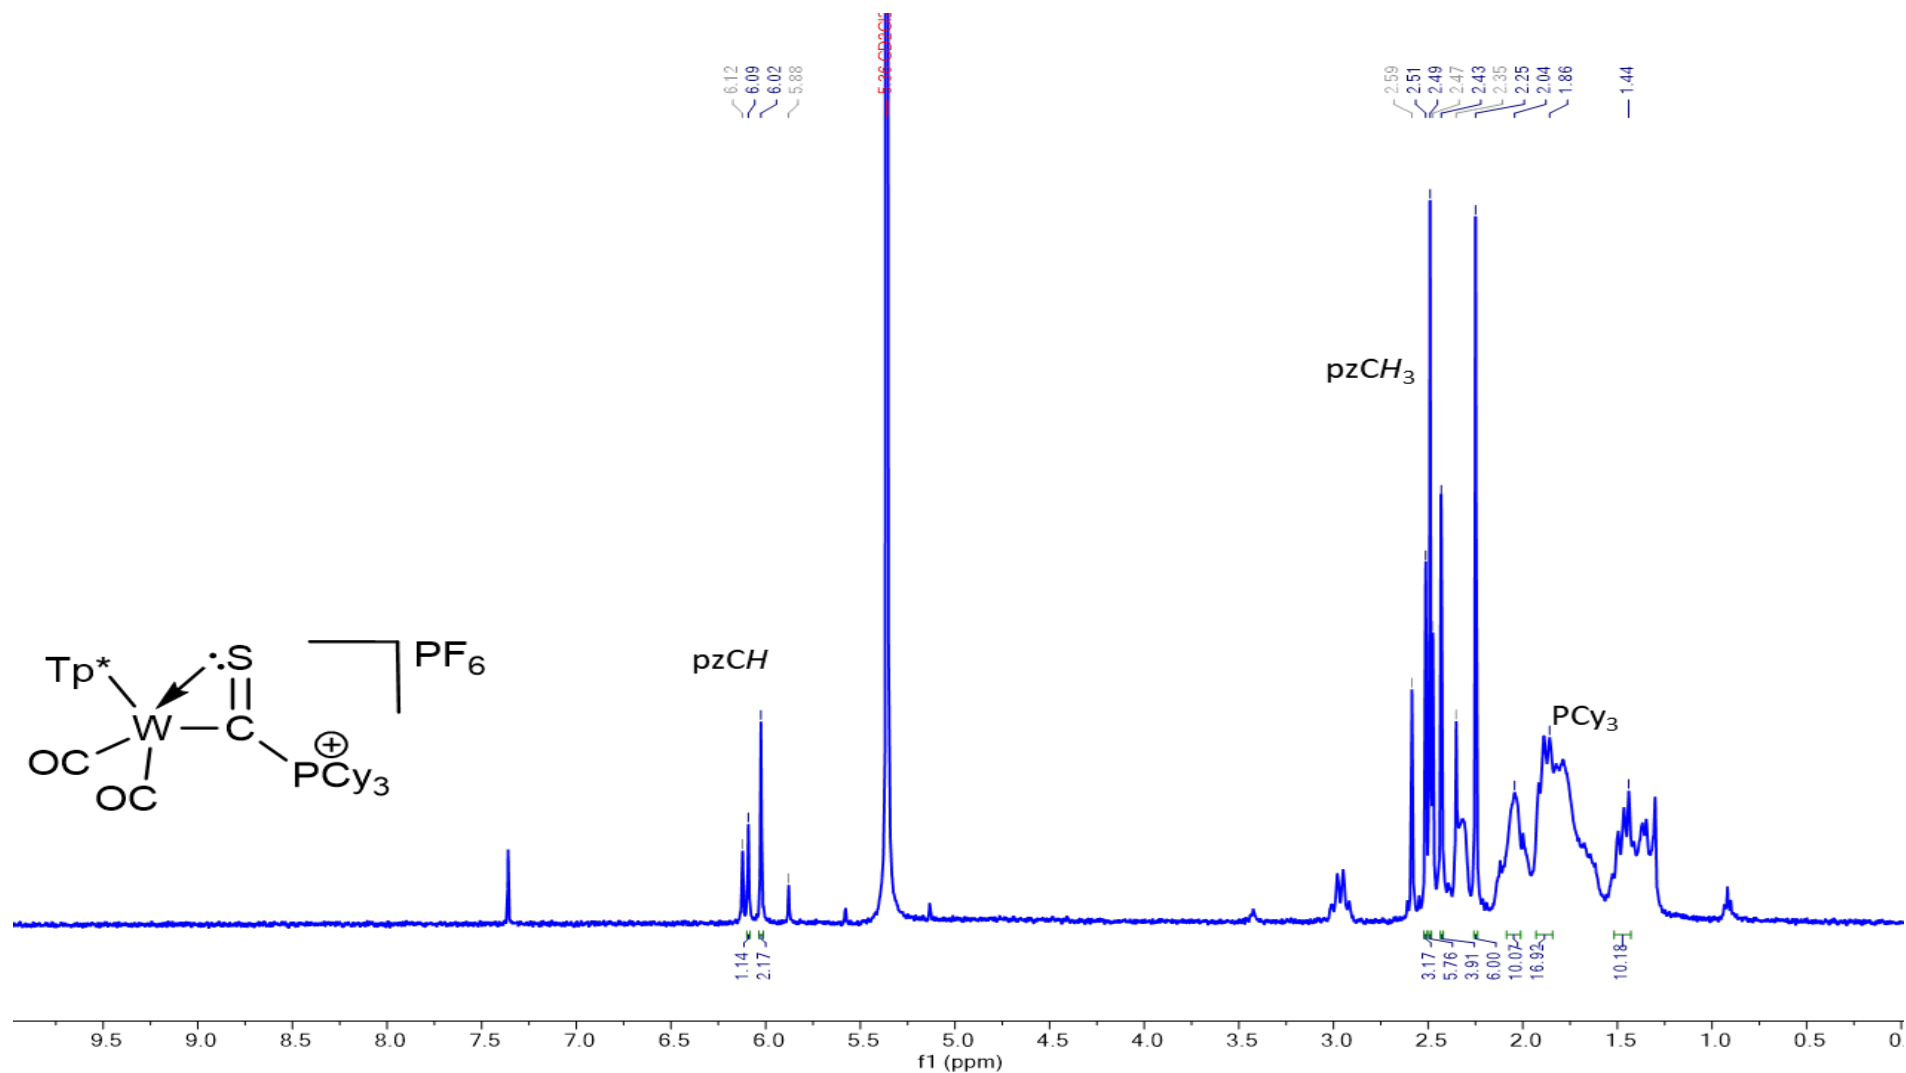

Figure S50:  $^1\text{H}$  NMR Spectrum of  $[(\text{Tp}^*)(\text{CO})_2\text{W}(\text{SCPCy}_3)]\text{PF}_6$  (2d; 400 MHz,  $\text{CD}_2\text{Cl}_2$ ,  $25^\circ\text{C}$ ,  $\delta$ )

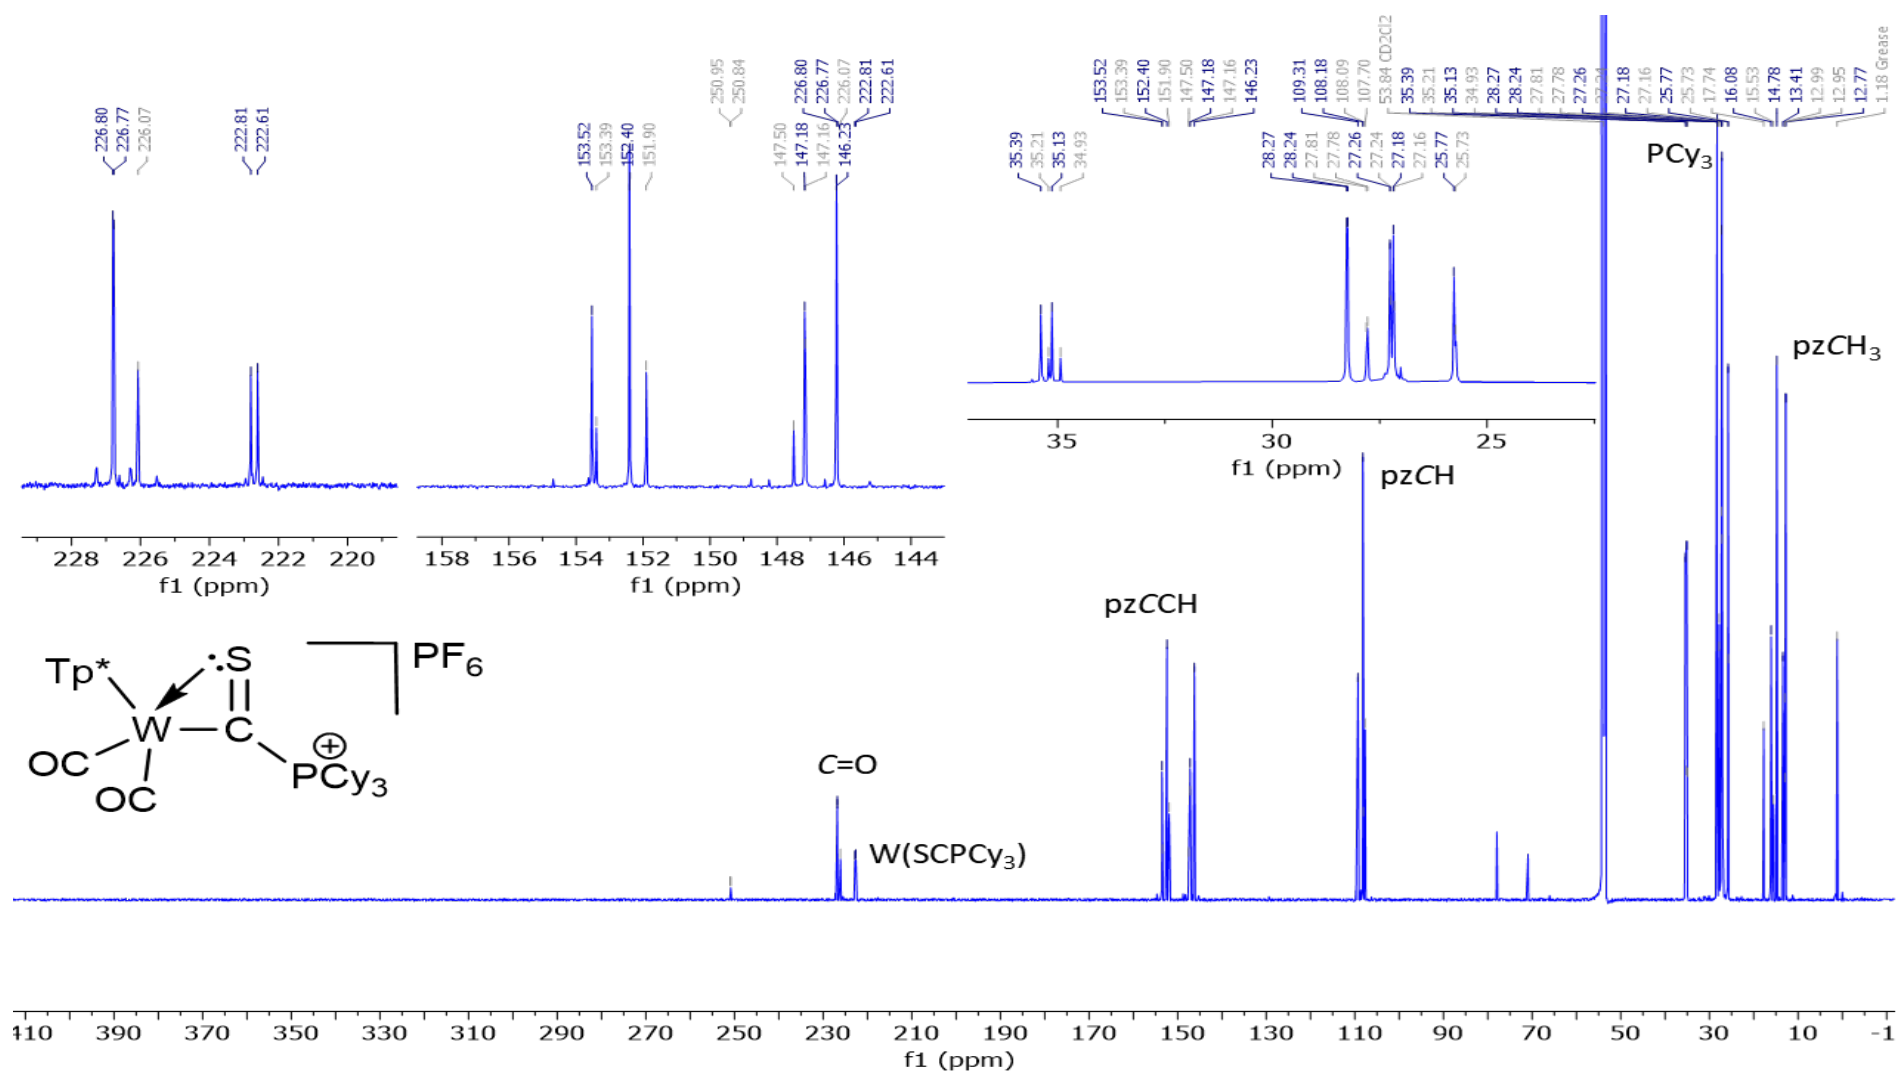

Figure S51  $^{13}\text{C}\{^1\text{H}\}$  NMR Spectrum of  $[(\text{Tp}^*)(\text{CO})_2\text{W}(\text{SCPCy}_3)]\text{PF}_6$  (2d; 151 MHz,  $\text{CD}_2\text{Cl}_2$ ,  $25^\circ\text{C}$ ,  $\delta$ )

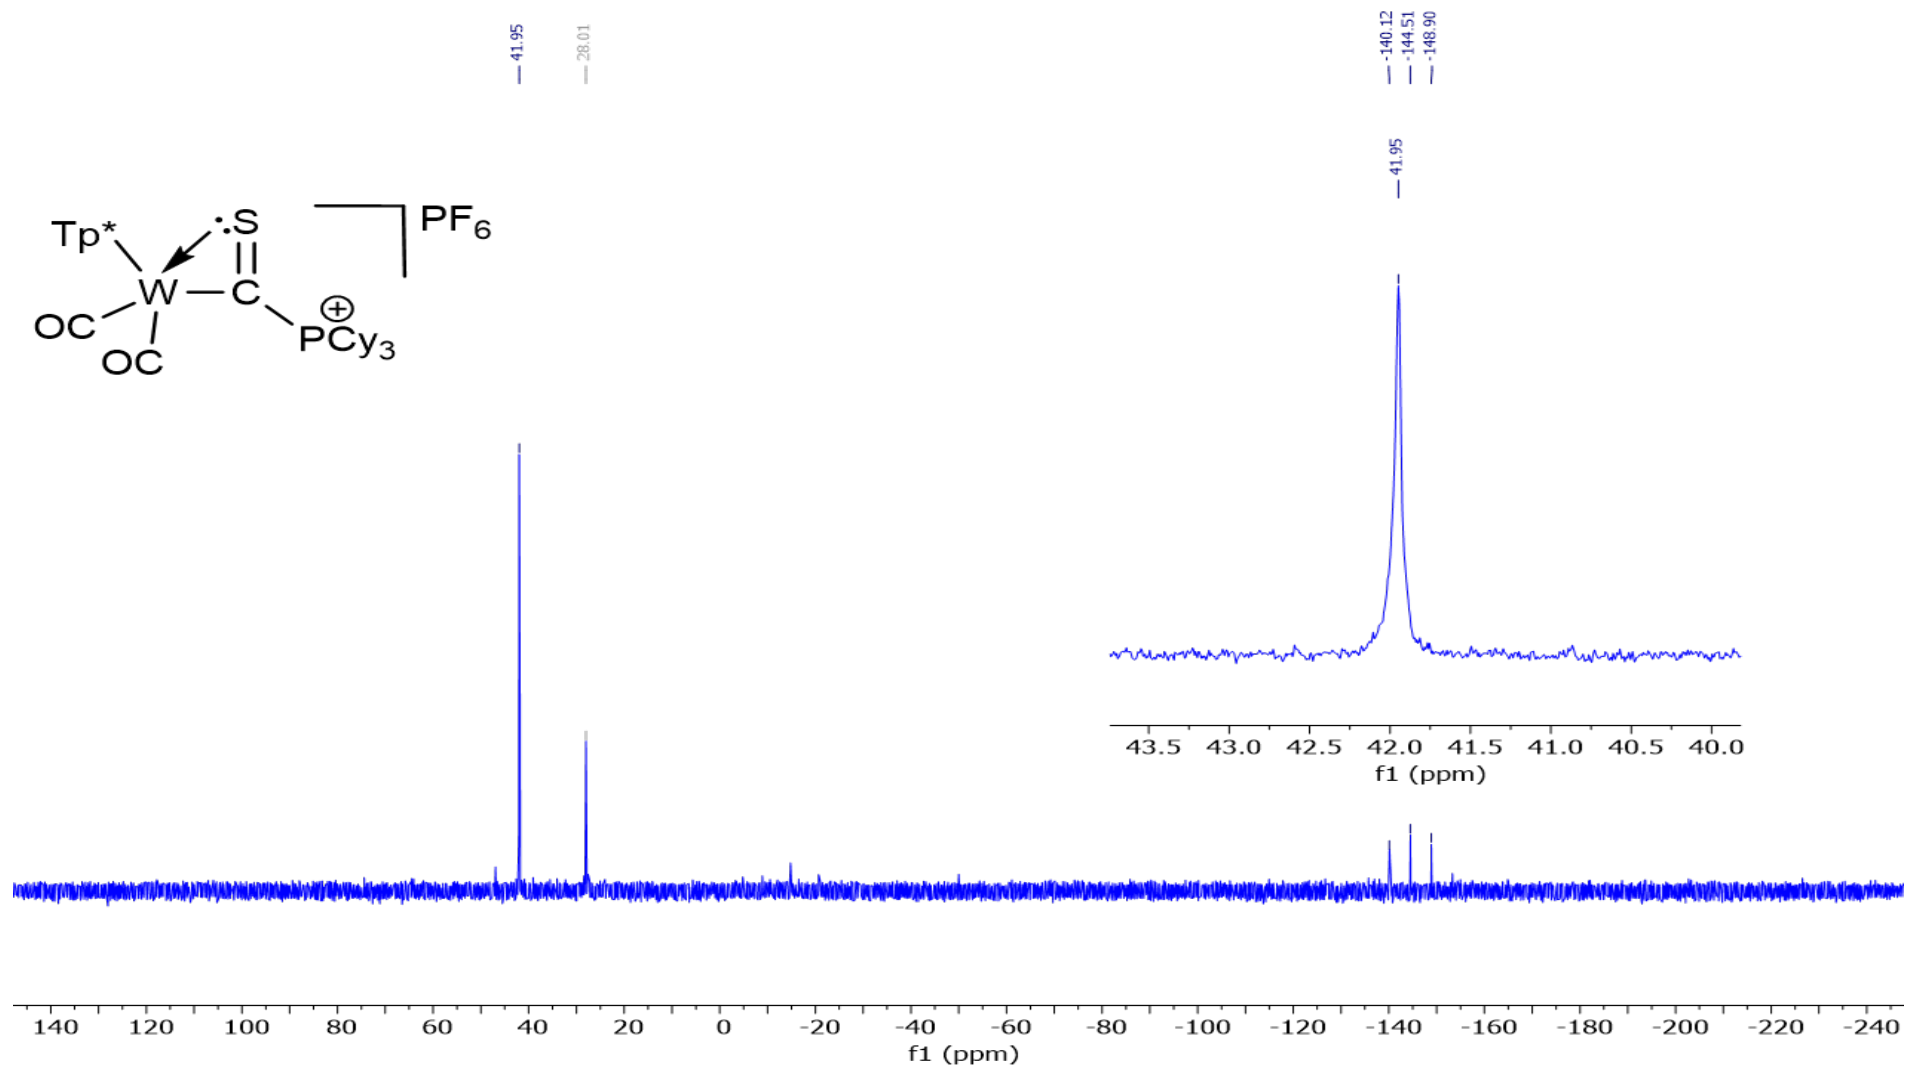

Figure S52: <sup>31</sup>P{<sup>1</sup>H} NMR Spectrum of  $[W(SCPCy_3)(CO)_2(Tp^*)]PF_6$  (2d; 162 MHz, CD<sub>2</sub>Cl<sub>2</sub>, 25 °C, δ)

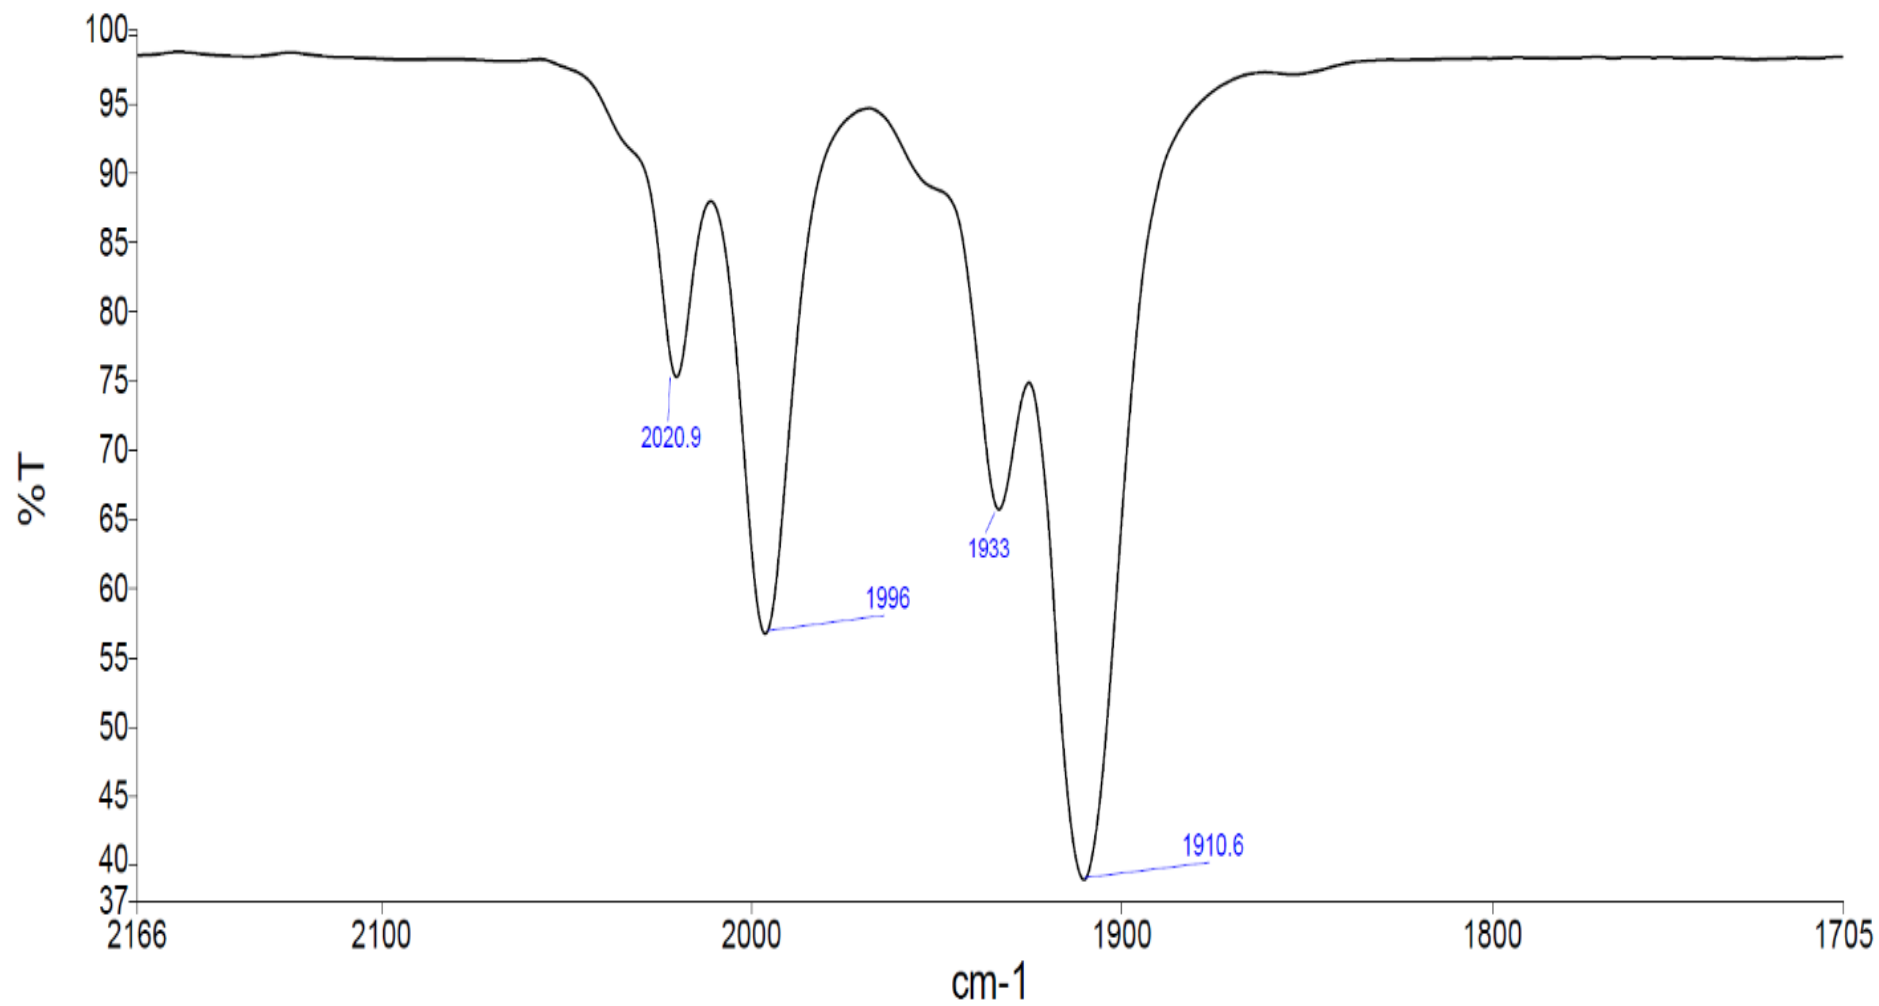

Figure S53: Infrared Spectrum of [W(SCPCy<sub>3</sub>)(CO)<sub>2</sub>(Tp\*)]PF<sub>6</sub> (2d; CH<sub>2</sub>Cl<sub>2</sub>, 25 °C, v)

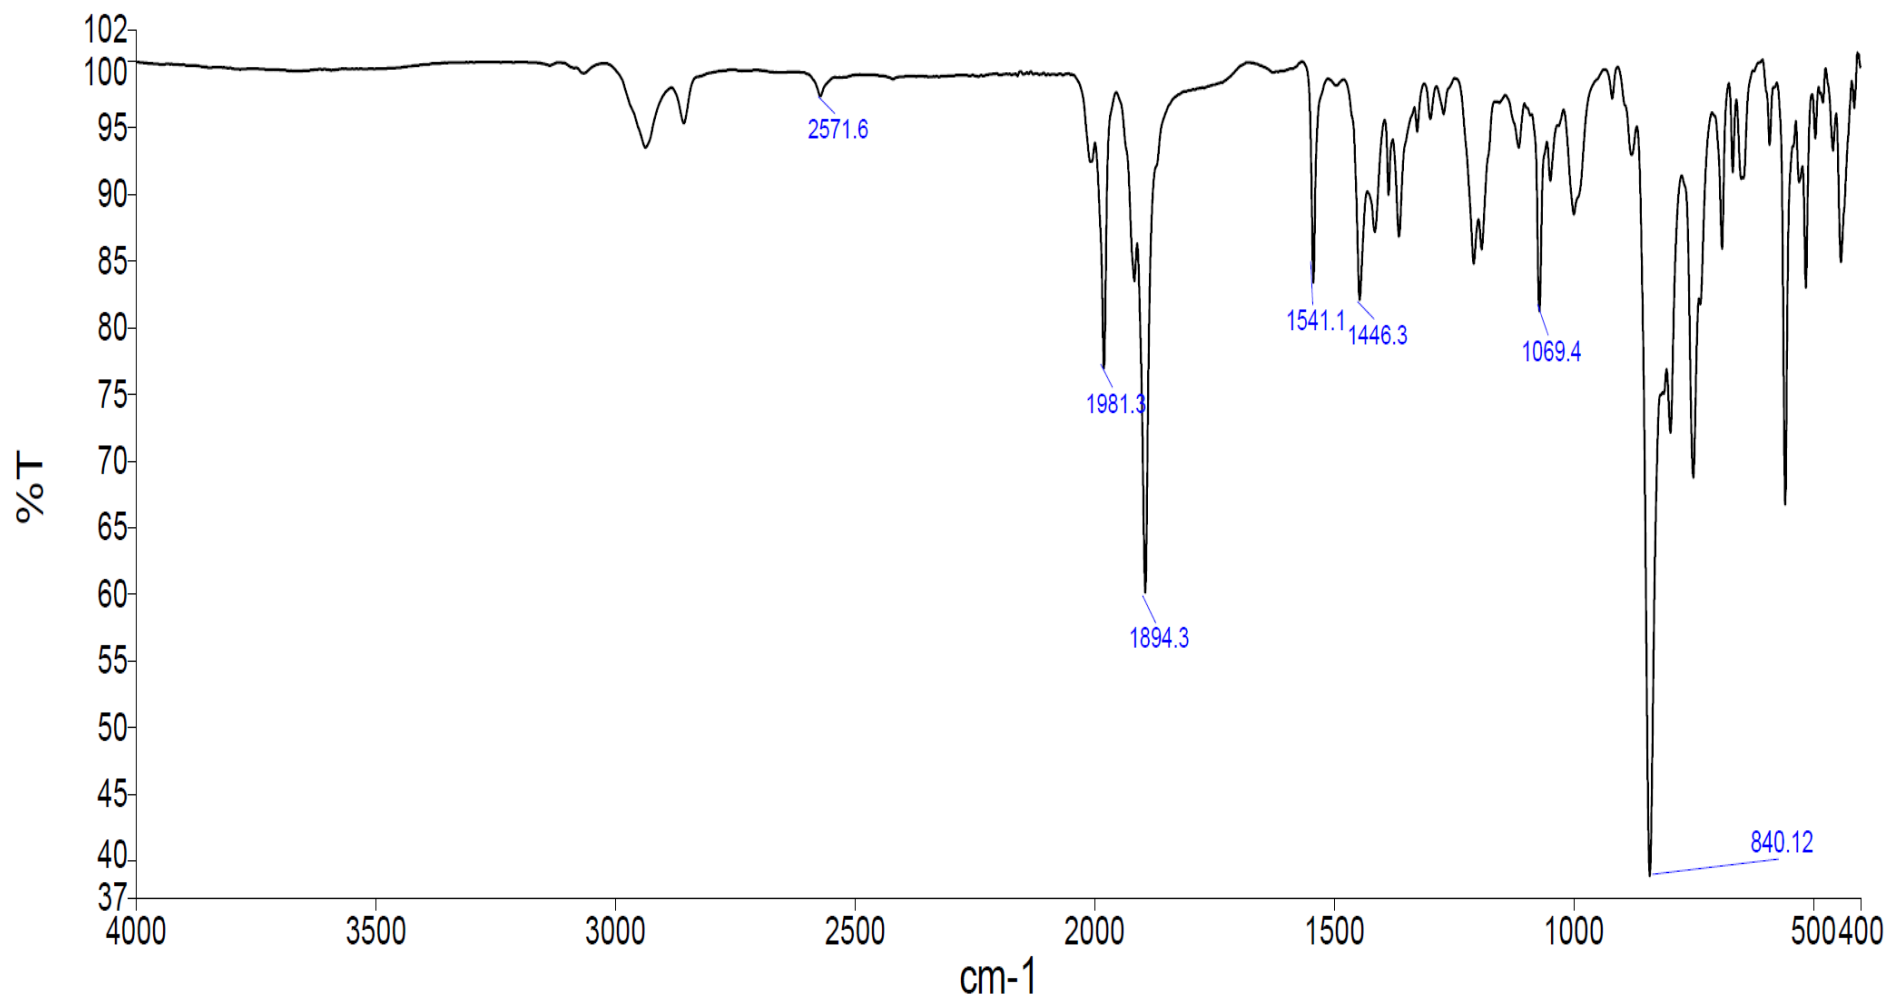

Figure S54: Infrared Spectrum of  $[\text{W}(\text{SCPCy}_3)(\text{CO})_2(\text{Tp}^*)]\text{PF}_6$  (2d; ATR, 25 °C, v)

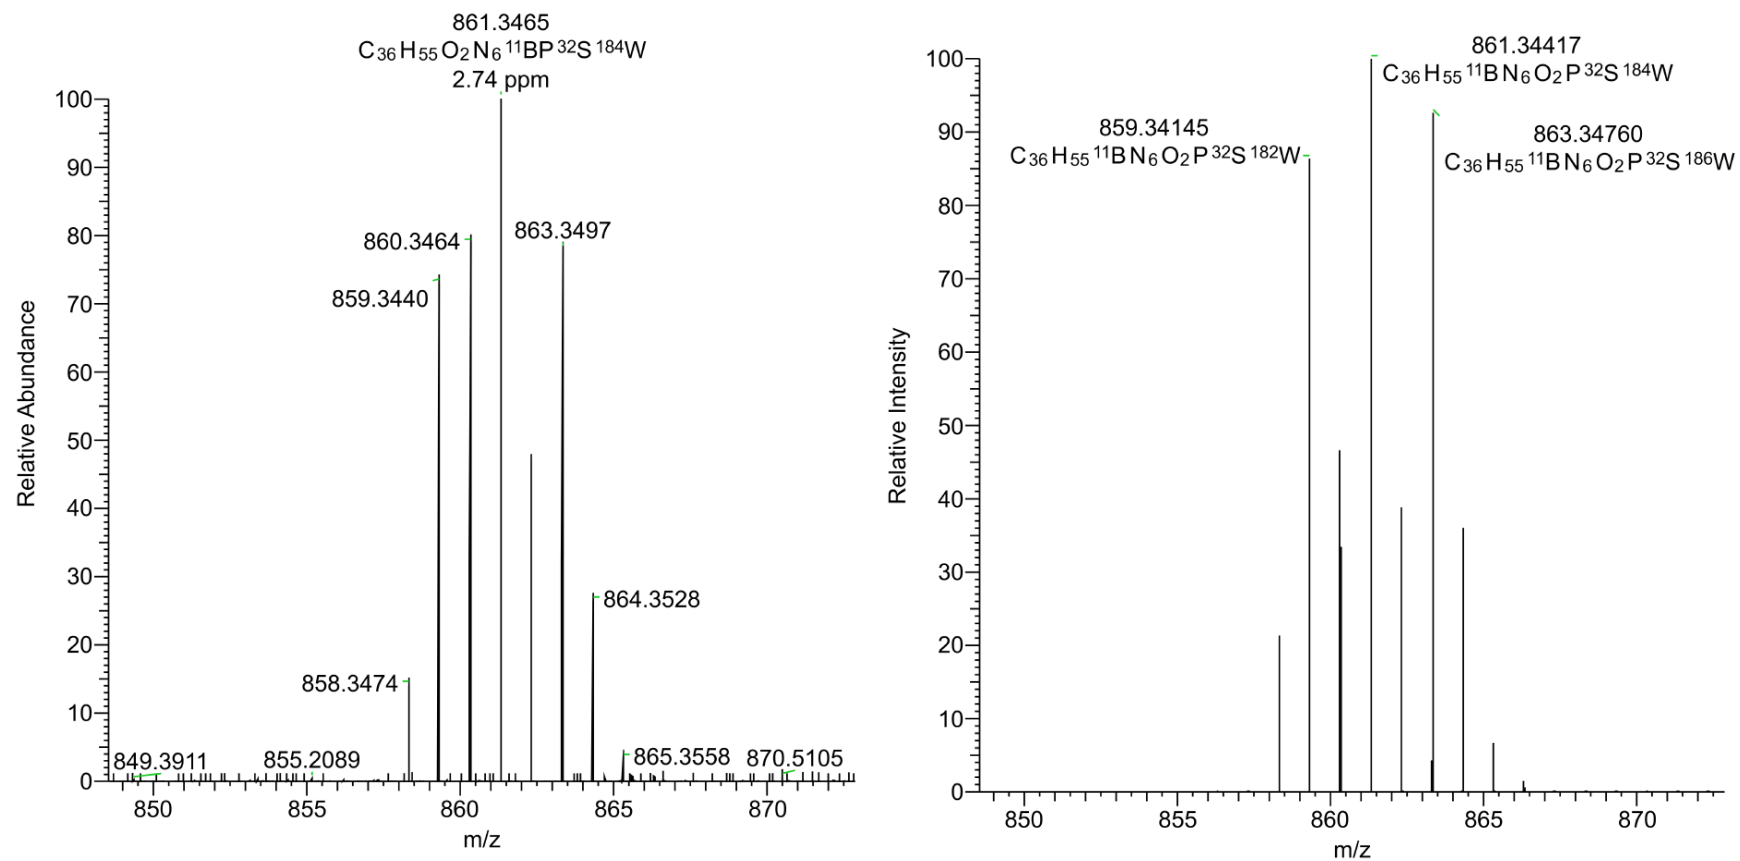

Figure S55: Mass Spectrum (ESI, +ve ion) of  $[W(SCPCy_3)(CO)_2(Tp^*)]PF_6(2d)$

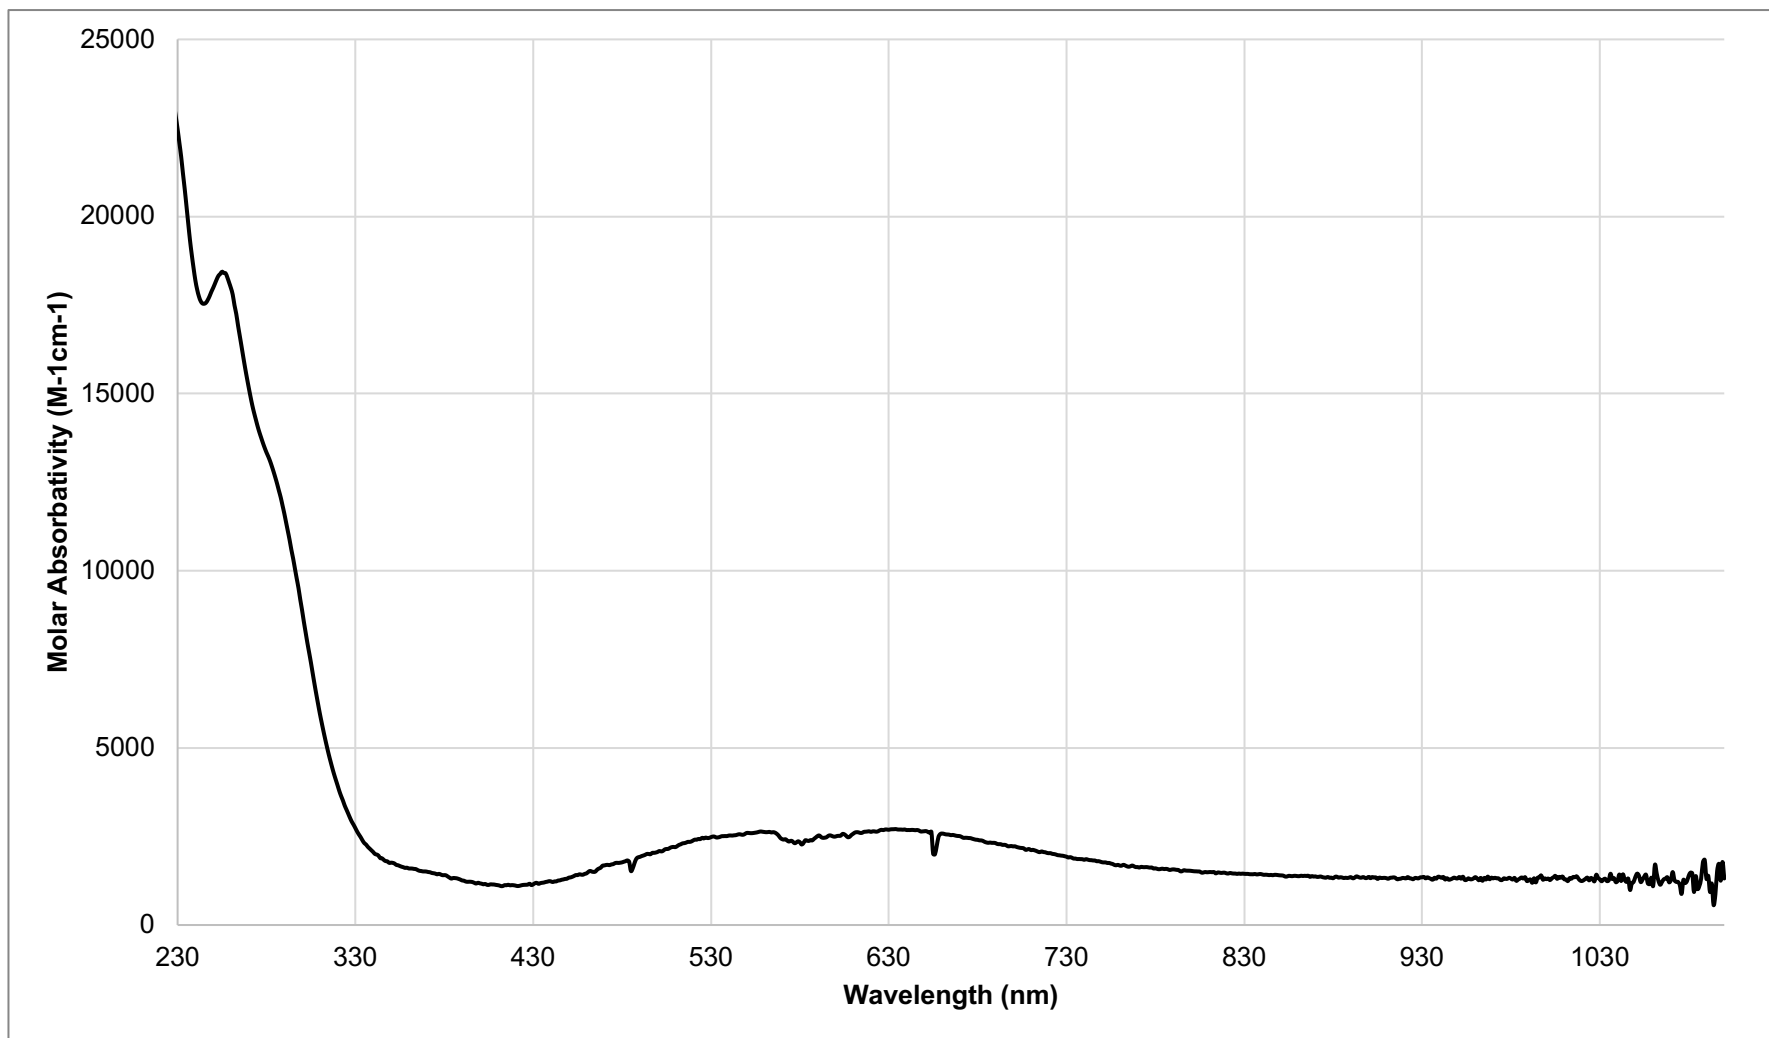

Figure S56: Electronic spectrum of  $[W(SCPCy_3)(CO)_2(Tp^*)].PF_6$  in  $CH_2Cl_2$  [2d;  $M = 3.922(4) \times 10^{-5} \text{ molL}^{-1}$ ].



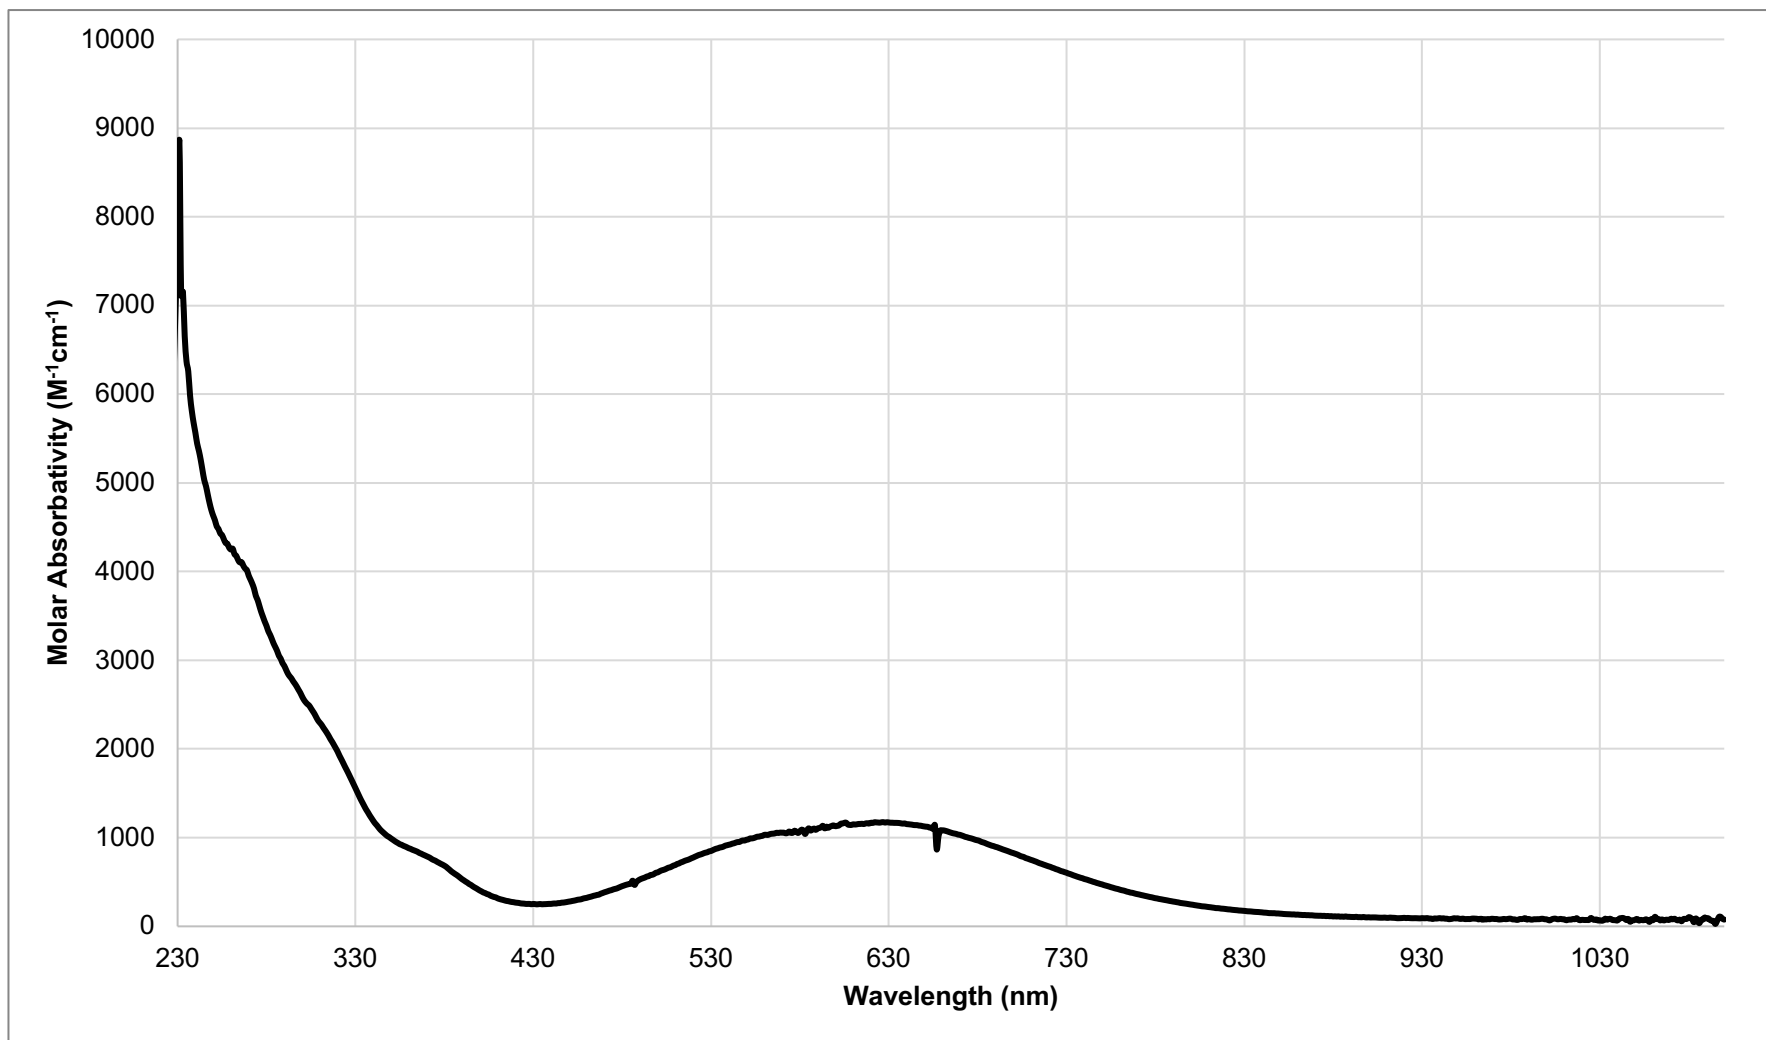

Figure S57: Electronic spectrum of  $[W(SCPCy_3)(CO)_2(Tp^*)].PF_6$  in  $CH_2Cl_2$  [2d;  $M = 3.922(4) \times 10^{-4} molL^{-1}$ ].

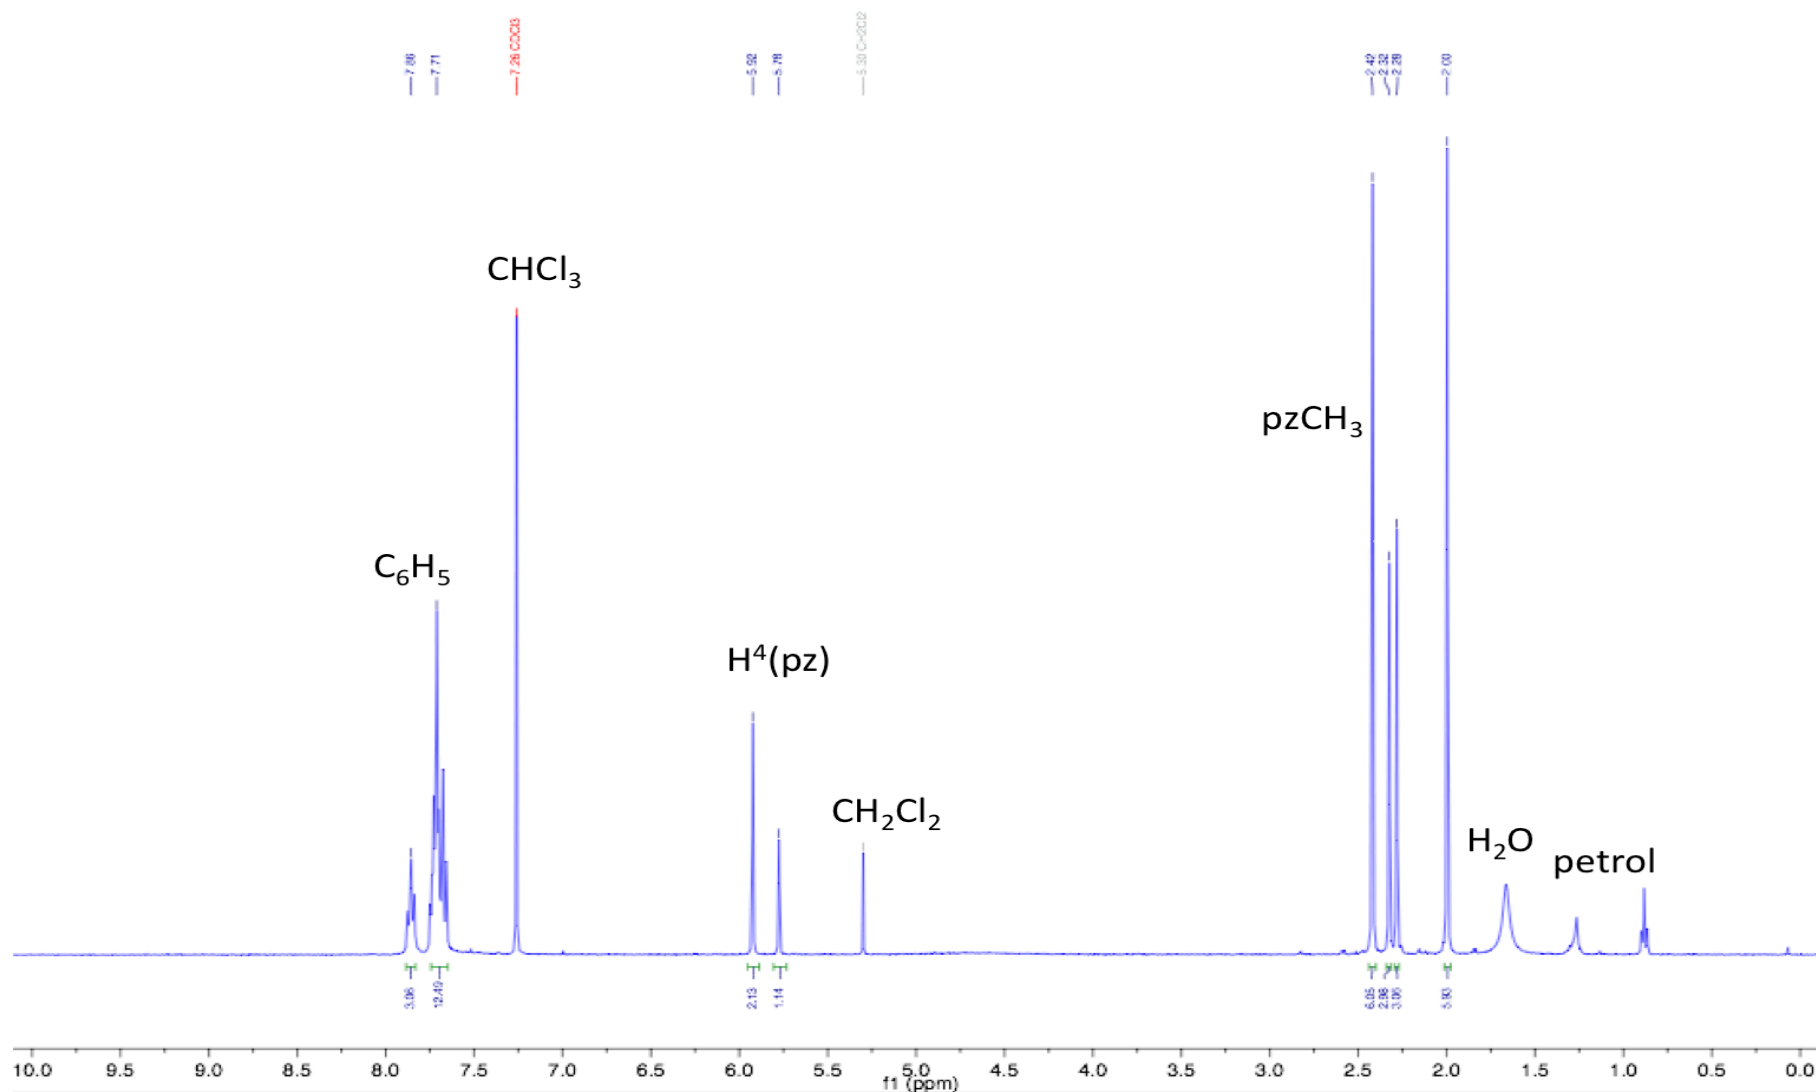

Figure S58:  $^1\text{H}$  NMR Spectrum of  $[\text{Mo}(\equiv\text{CPh}_3)(\text{CO})_2(\text{Tp}^*)]\text{PF}_6$  (3a; 400 MHz,  $\text{CDCl}_3$ , 25  $^\circ\text{C}$ ,  $\delta$ )

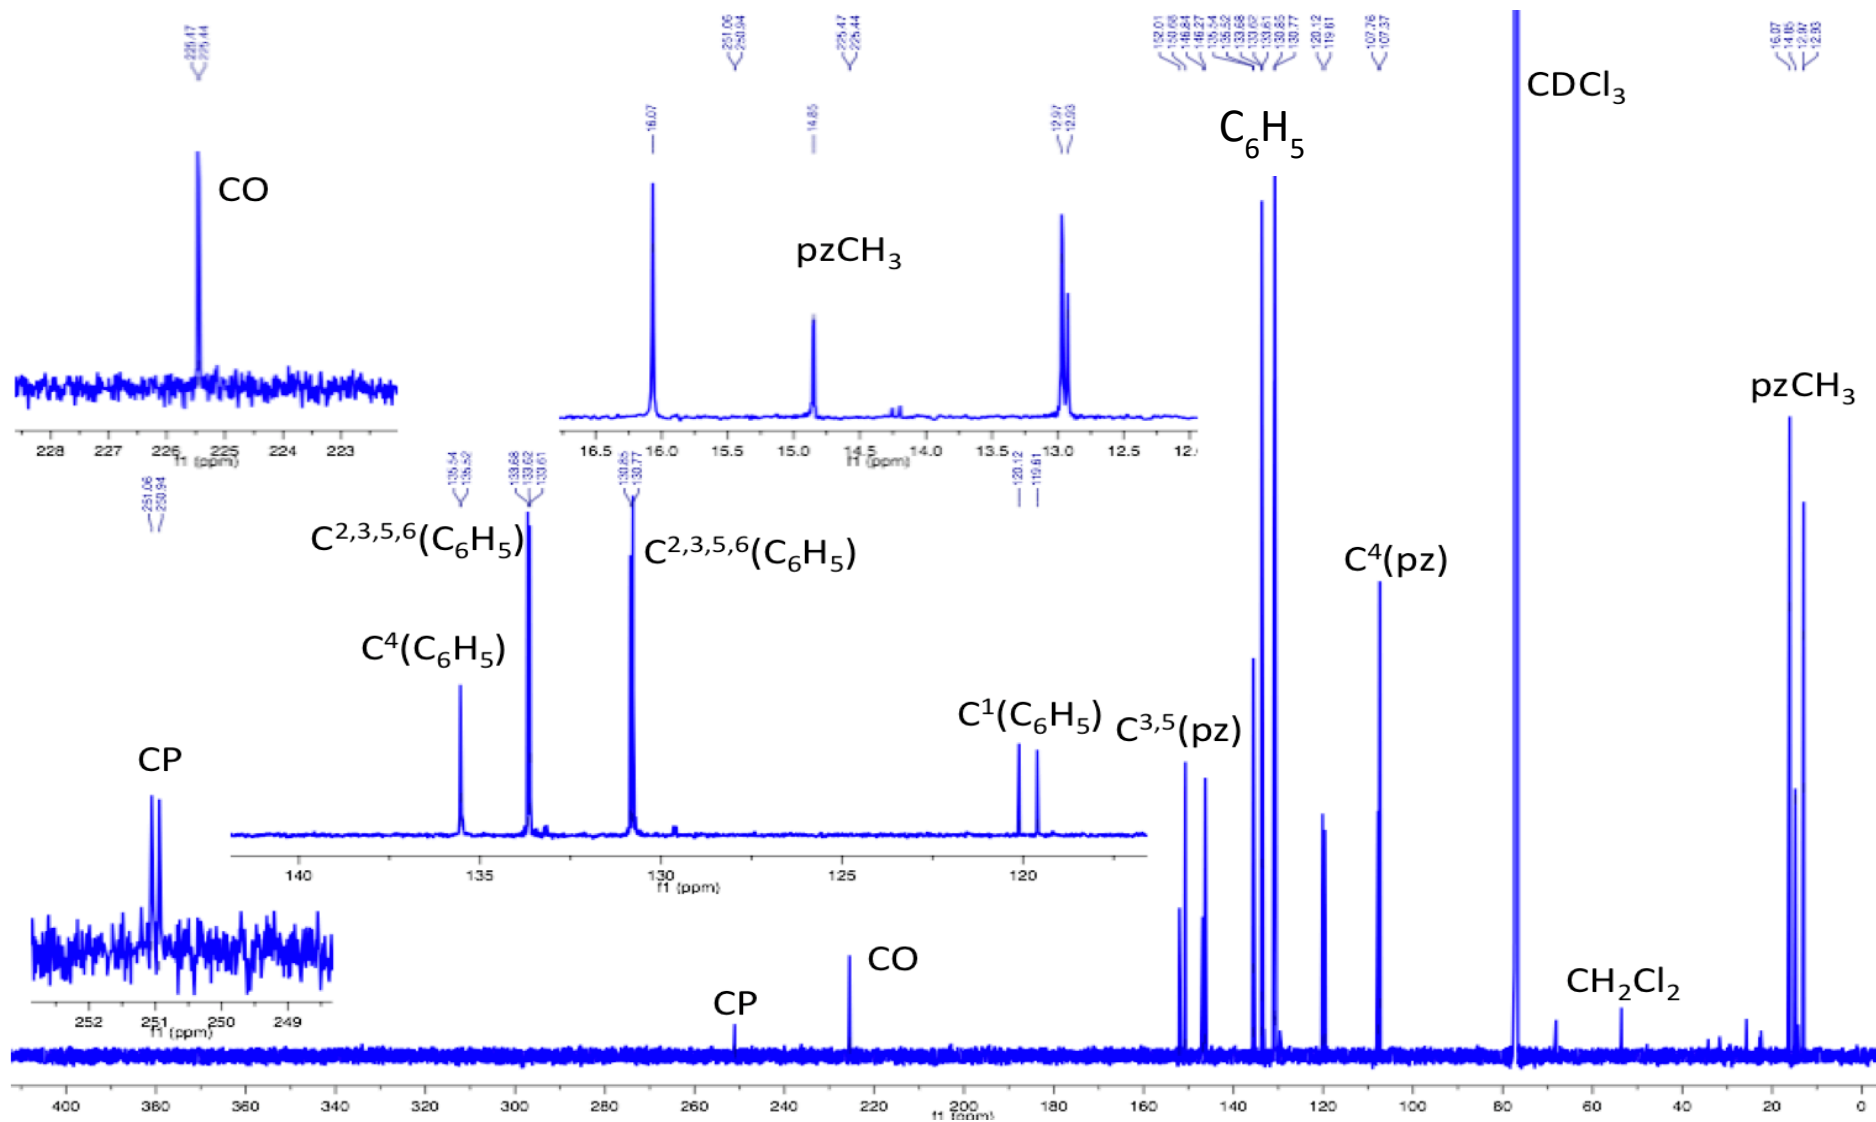

Figure S59:  $^{13}\text{C}\{^1\text{H}\}$  NMR Spectrum of  $[\text{Mo}(\text{=CPPH}_3)(\text{CO})_2(\text{Tp}^*)]\text{PF}_6$  (3a; 176 MHz,  $\text{CDCl}_3$ , 25 °C,  $\delta$ )

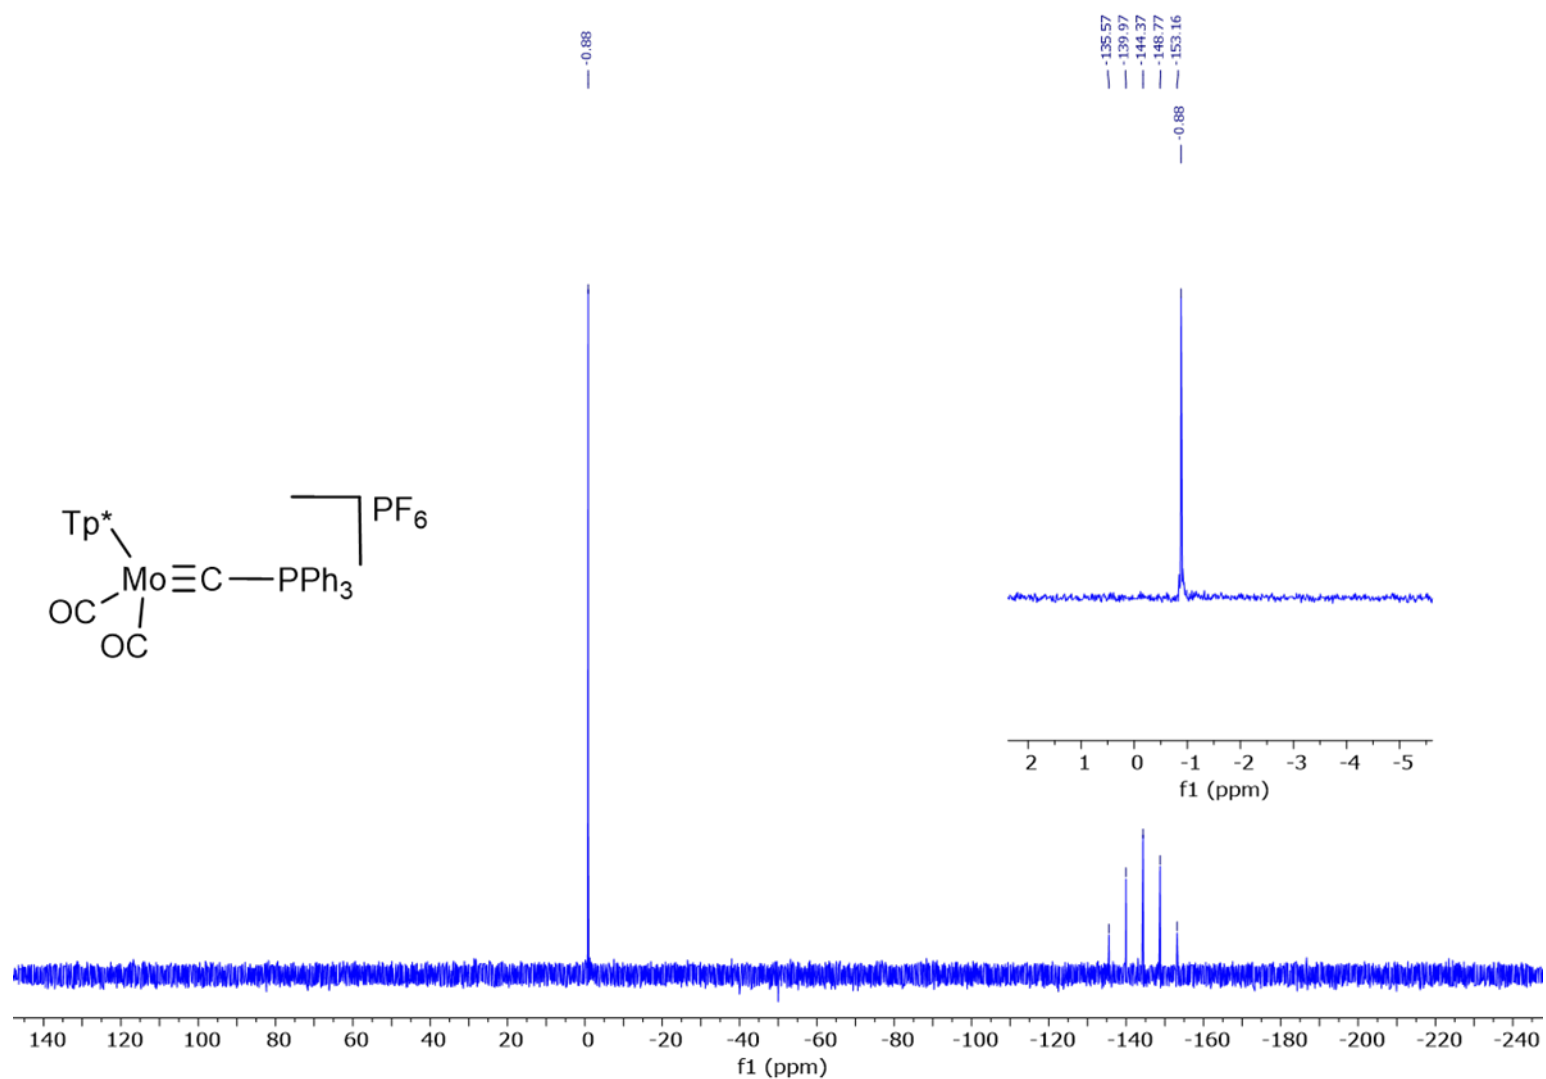

Figure S60:  $^{31}\text{P}\{^1\text{H}\}$  NMR Spectrum of  $[\text{Mo}(\equiv\text{CPh}_3)(\text{CO})_2(\text{Tp}^*)]\text{PF}_6$  (3a; 162 MHz,  $\text{CDCl}_3$ , 25 °C,  $\delta$ )

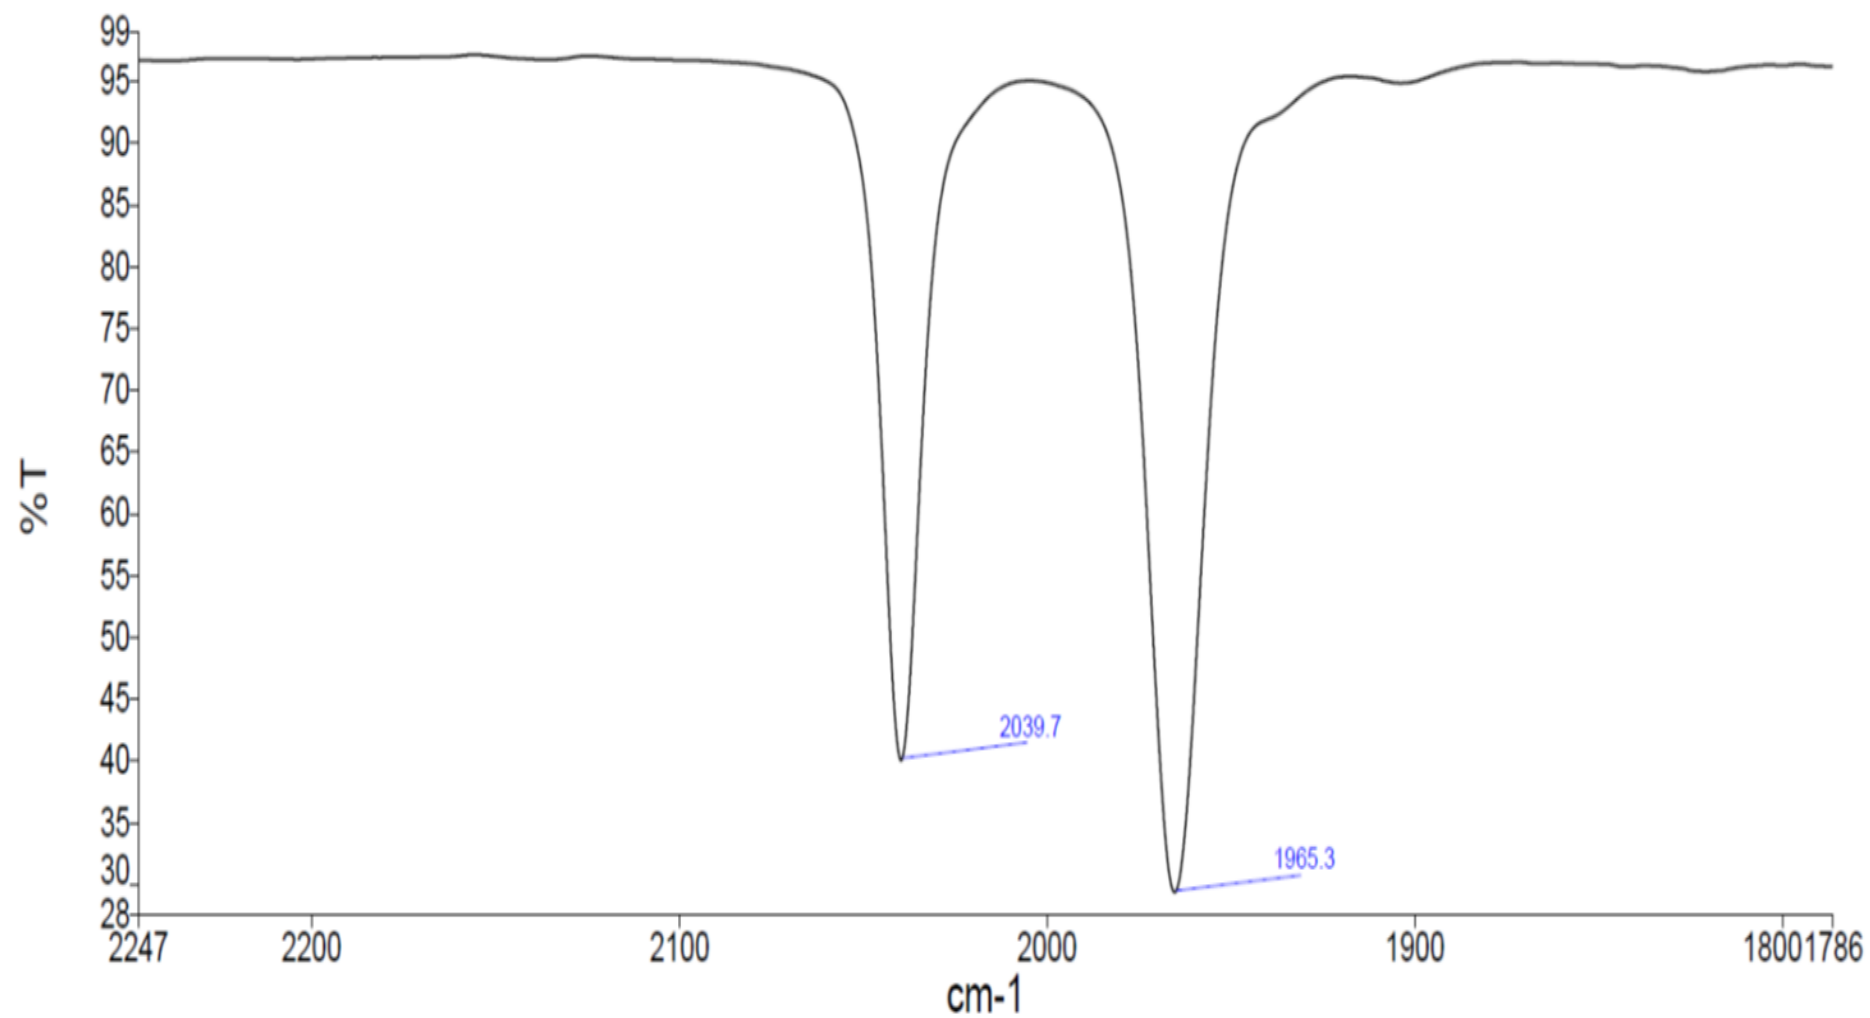

Figure S61: Infrared Spectrum of  $[\text{Mo}(\equiv\text{CPh}_3)(\text{CO})_2(\text{Tp}^*)]\text{PF}_6$  (3a;  $\text{CH}_2\text{Cl}_2$ , 25 °C, v)

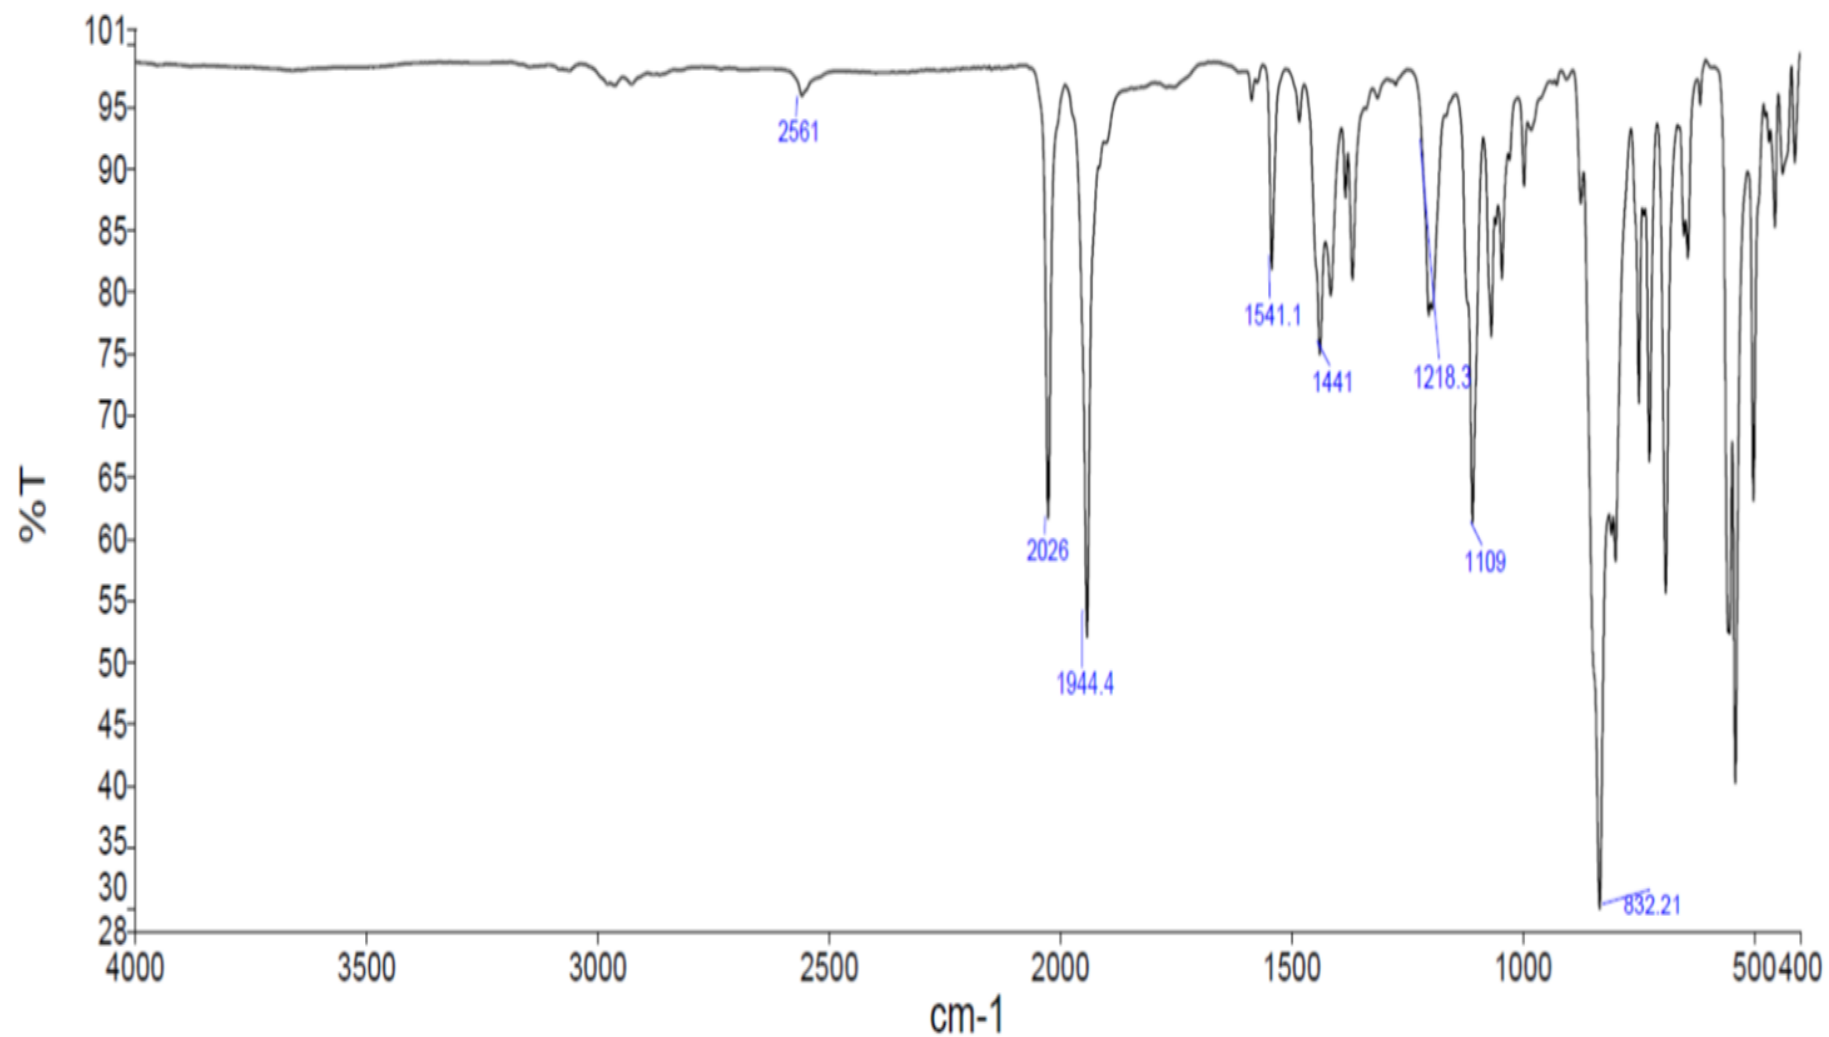

Figure S62: Infrared Spectrum of [Mo(CPPH<sub>3</sub>)(CO)<sub>2</sub>(Tp\*)]PF<sub>6</sub> (3a; ATR, 25 °C, v)

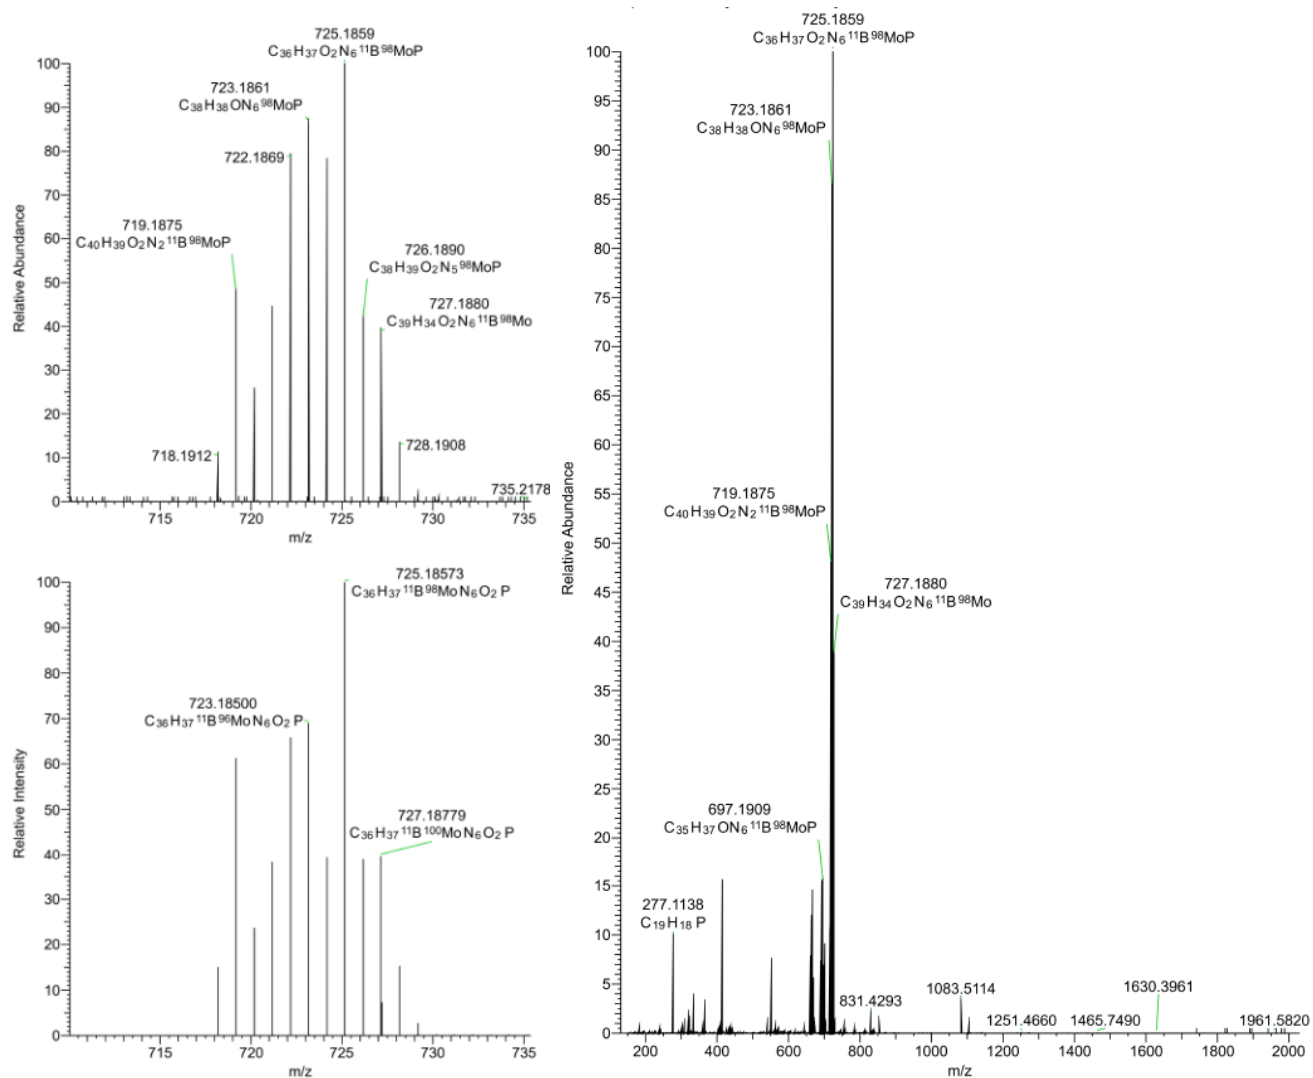

Figure S63: Mass Spectrum of (ESI, +ve ion) [Mo(=CPPh<sub>3</sub>)(CO)<sub>2</sub>(Tp\*)]PF<sub>6</sub> (3a)

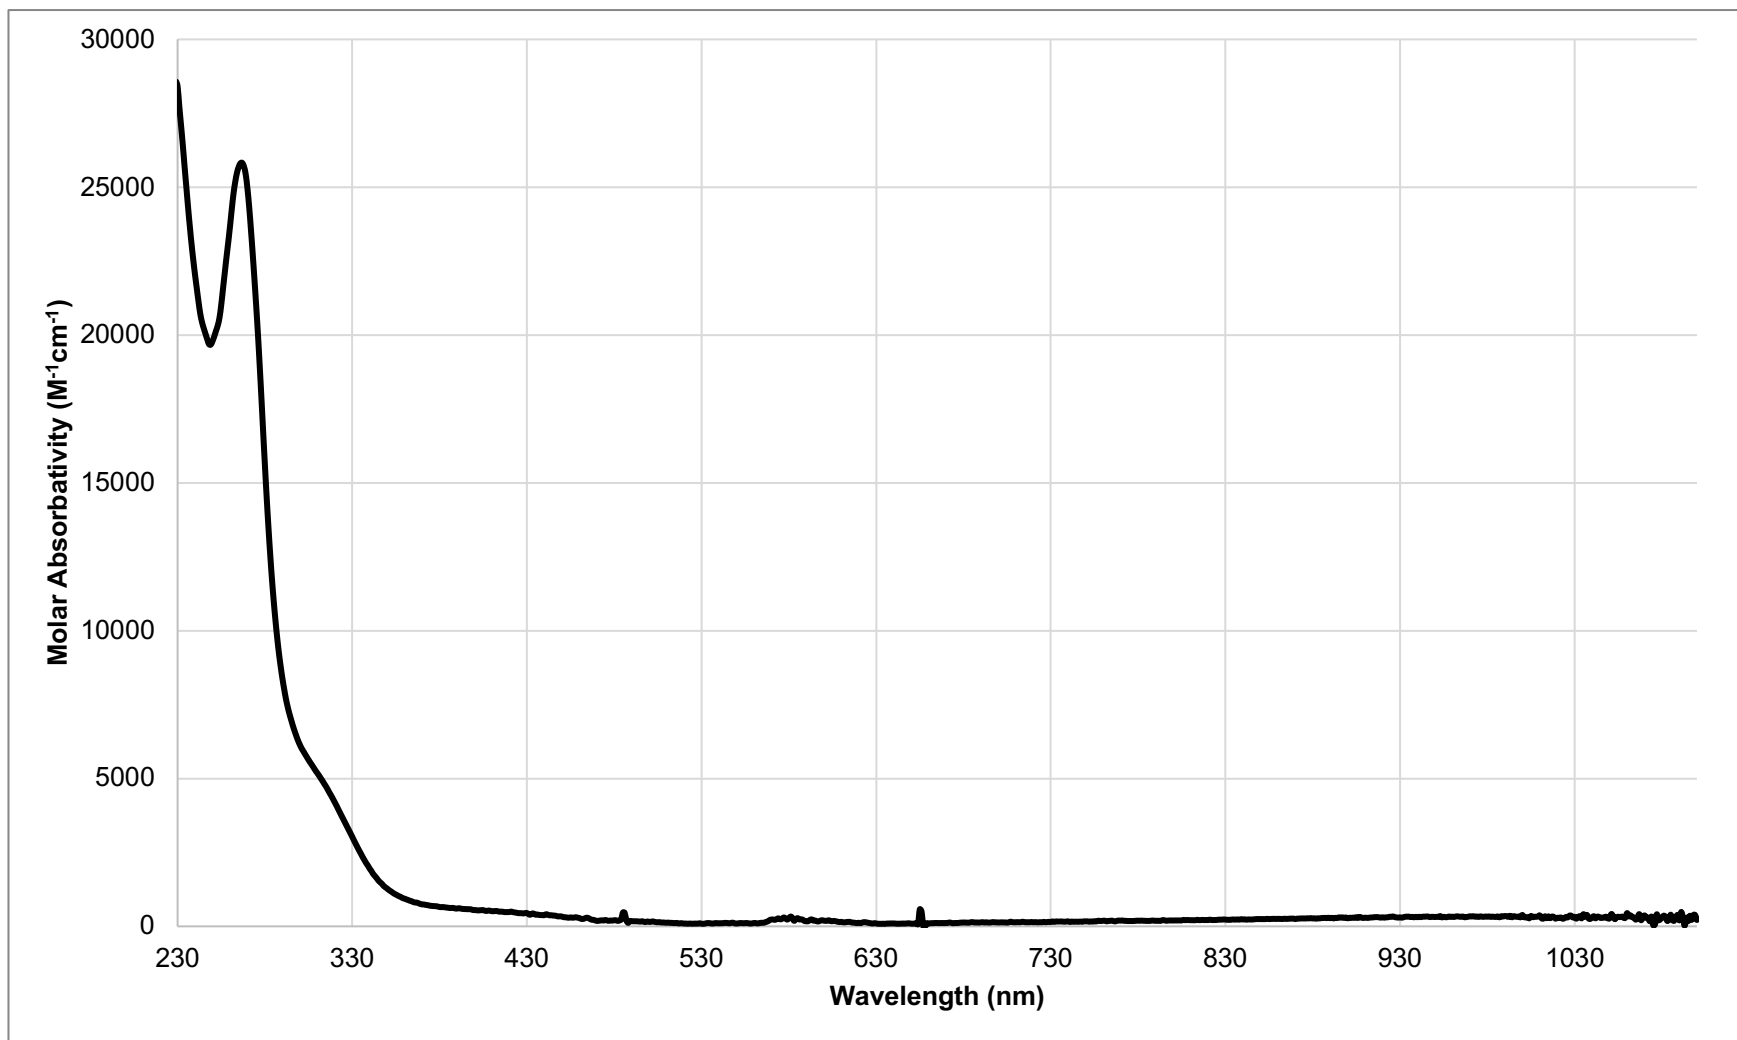

Figure S64: Electronic spectrum of  $[\text{Mo}(\text{CPPH}_3)(\text{CO})_2(\text{Tp}^*)].\text{PF}_6$  in  $\text{CH}_2\text{Cl}_2$  [3a;  $M = 2.851(3) \times 10^{-5} \text{ molL}^{-1}$ ].



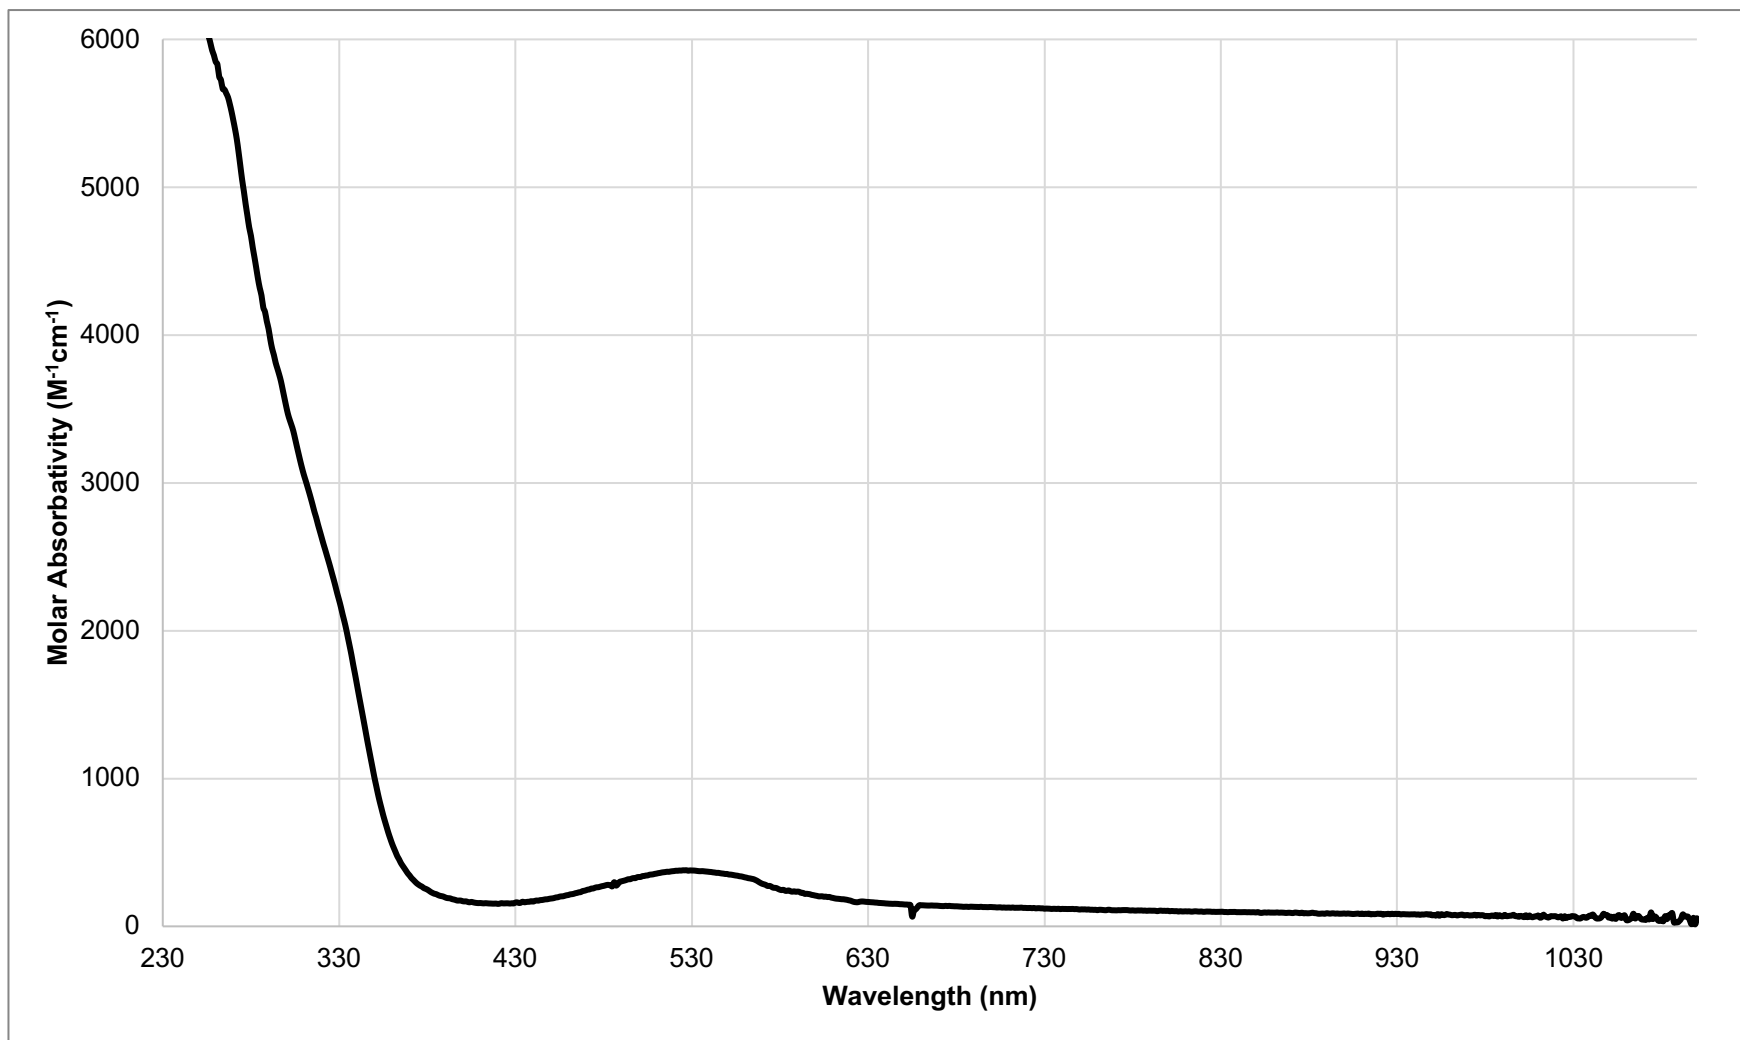

Figure S65: Electronic spectrum of  $[\text{Mo}(\text{CPPH}_3)(\text{CO})_2(\text{Tp}^*)].\text{PF}_6^-$  in  $\text{CH}_2\text{Cl}_2$  [3a;  $M = 2.851(3) \times 10^{-4} \text{ mol L}^{-1}$ ].

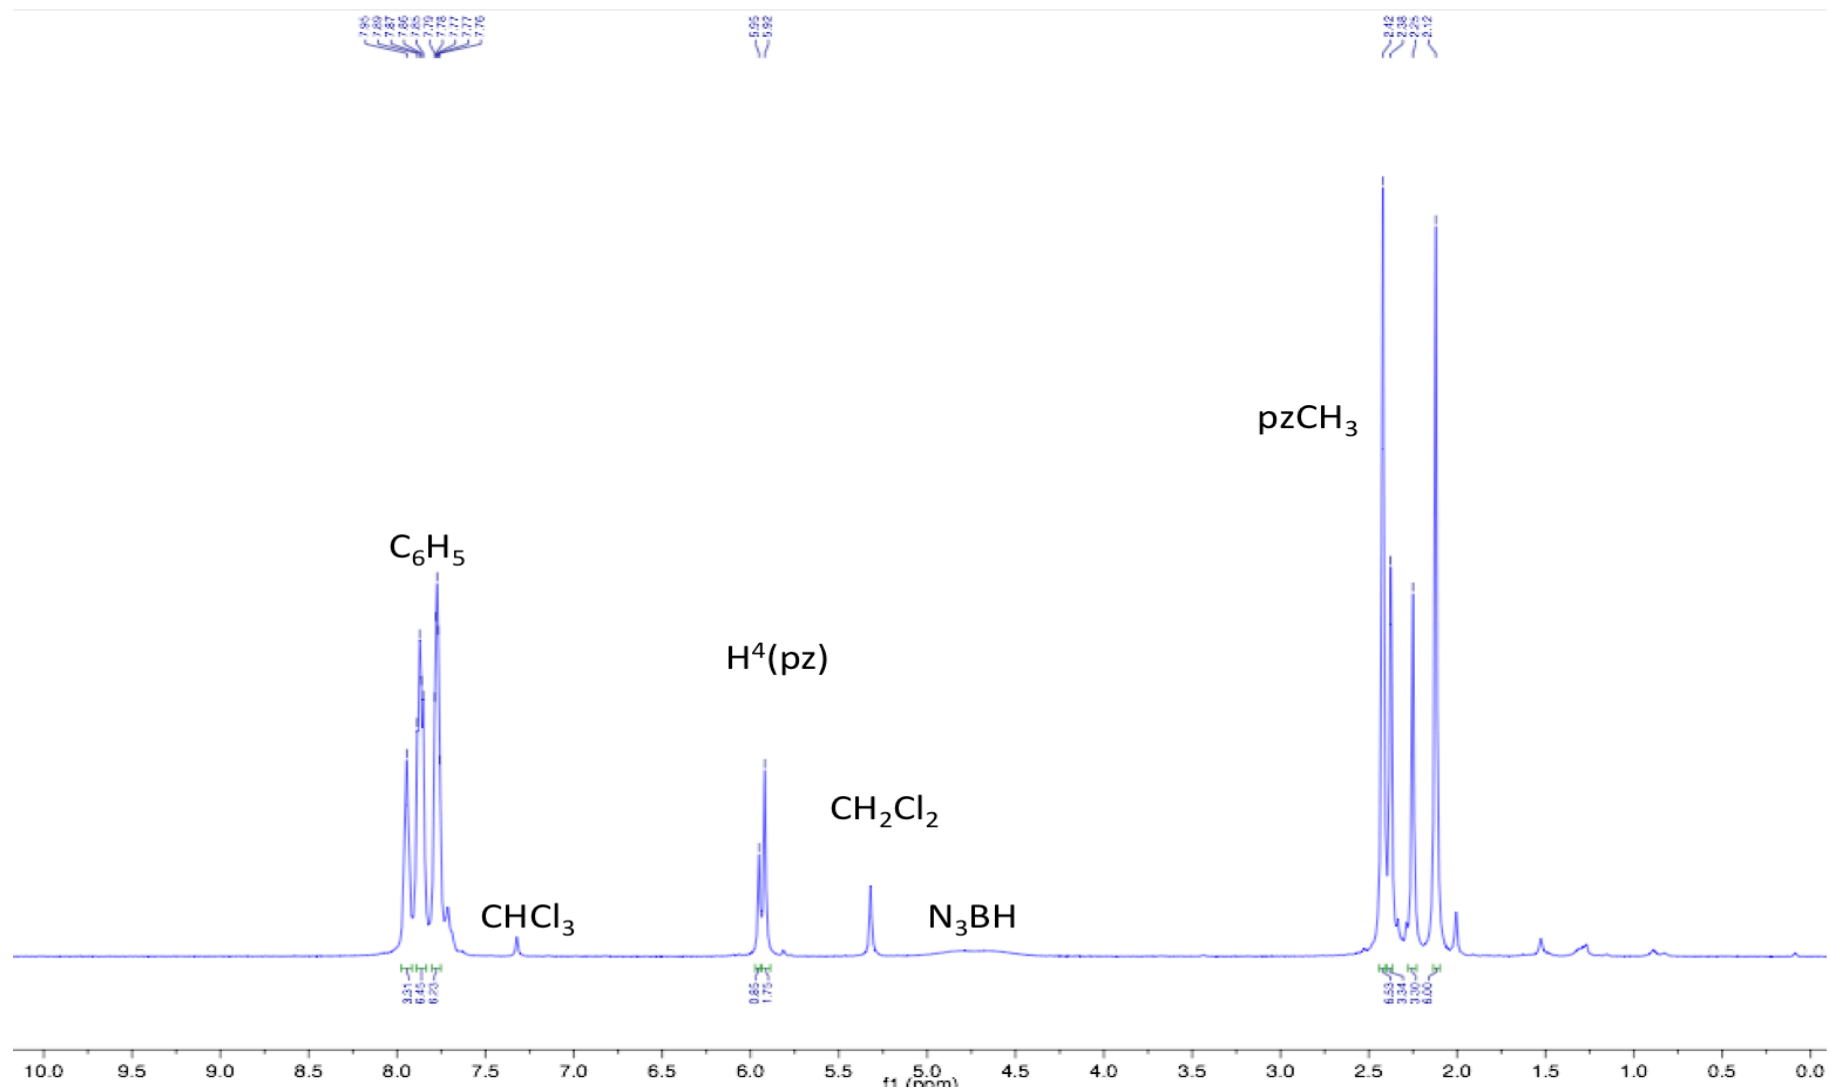

Figure S66:  $^1\text{H}$  NMR Spectrum of  $[\text{Mo}(\text{SCPPH}_3)(\text{CO})_2(\text{Tp}^*)]\text{PF}_6$  (4a; 400 MHz,  $\text{CD}_2\text{Cl}_2$ ,  $25^\circ\text{C}$ ,  $\delta$ )

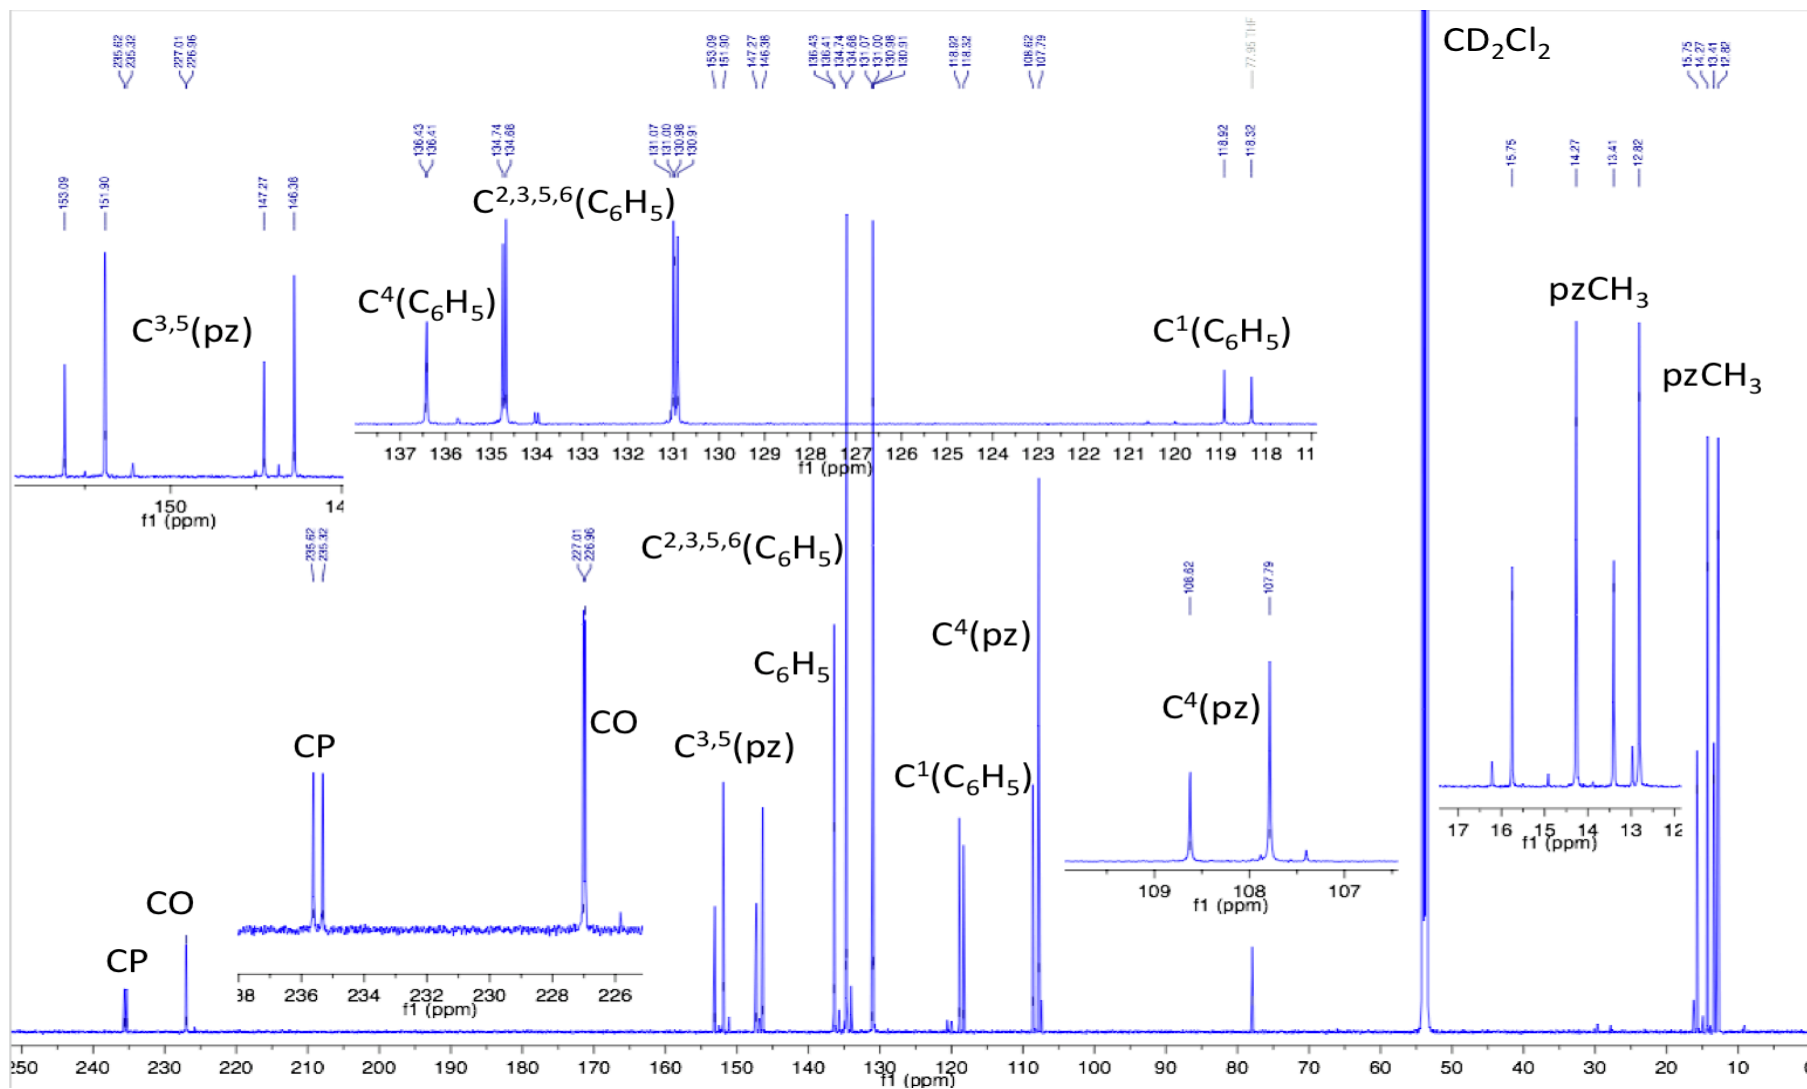

Figure S67:  $^{13}\text{C}\{^1\text{H}\}$  NMR Spectrum of  $[\text{Mo}(\text{SCPPH}_3)(\text{CO})_2(\text{Tp}^*)]\text{PF}_6$  (4a; 151 MHz,  $\text{CD}_2\text{Cl}_2$ , 25 °C,  $\delta$ )

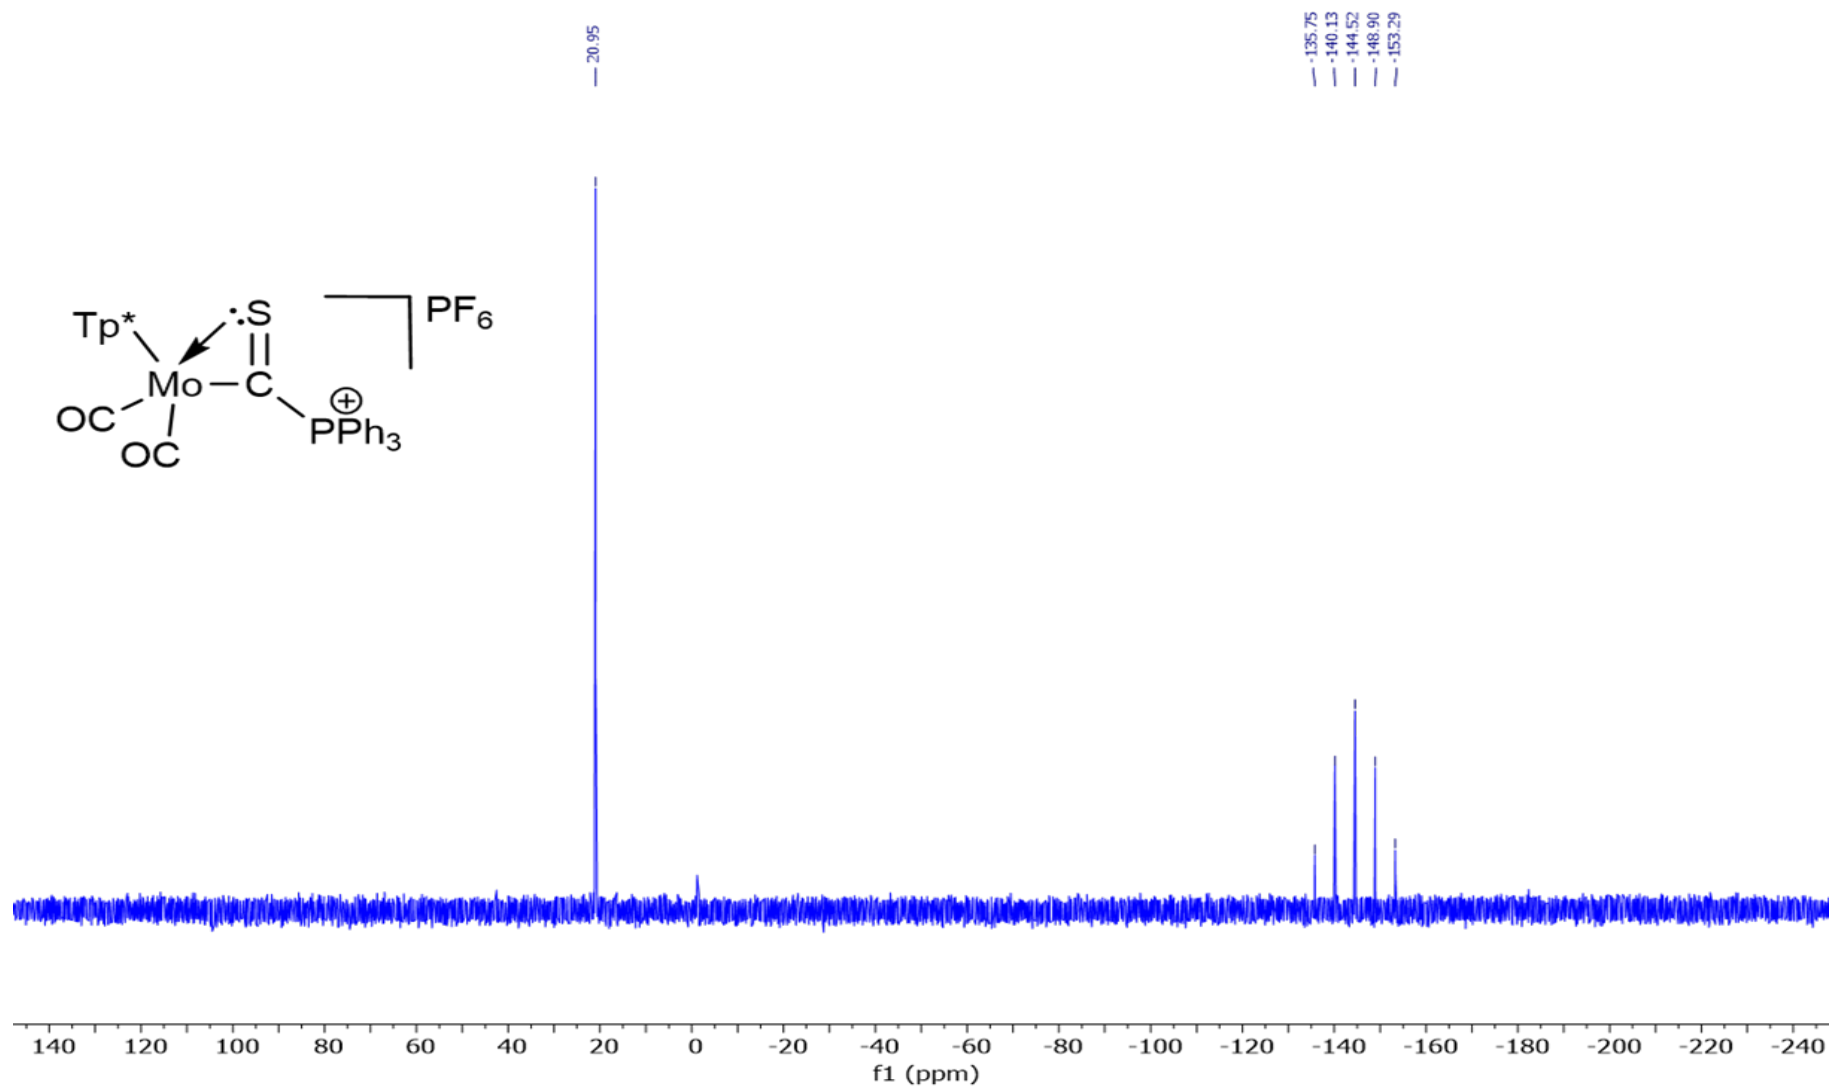

Figure S68:  $^{31}\text{P}\{^1\text{H}\}$  NMR Spectrum of  $[\text{Mo}(\text{SCPPH}_3)(\text{CO})_2(\text{Tp}^*)]\text{PF}_6$  (4a; 162 MHz,  $\text{CD}_2\text{Cl}_2$ , 25 °C,  $\delta$ )

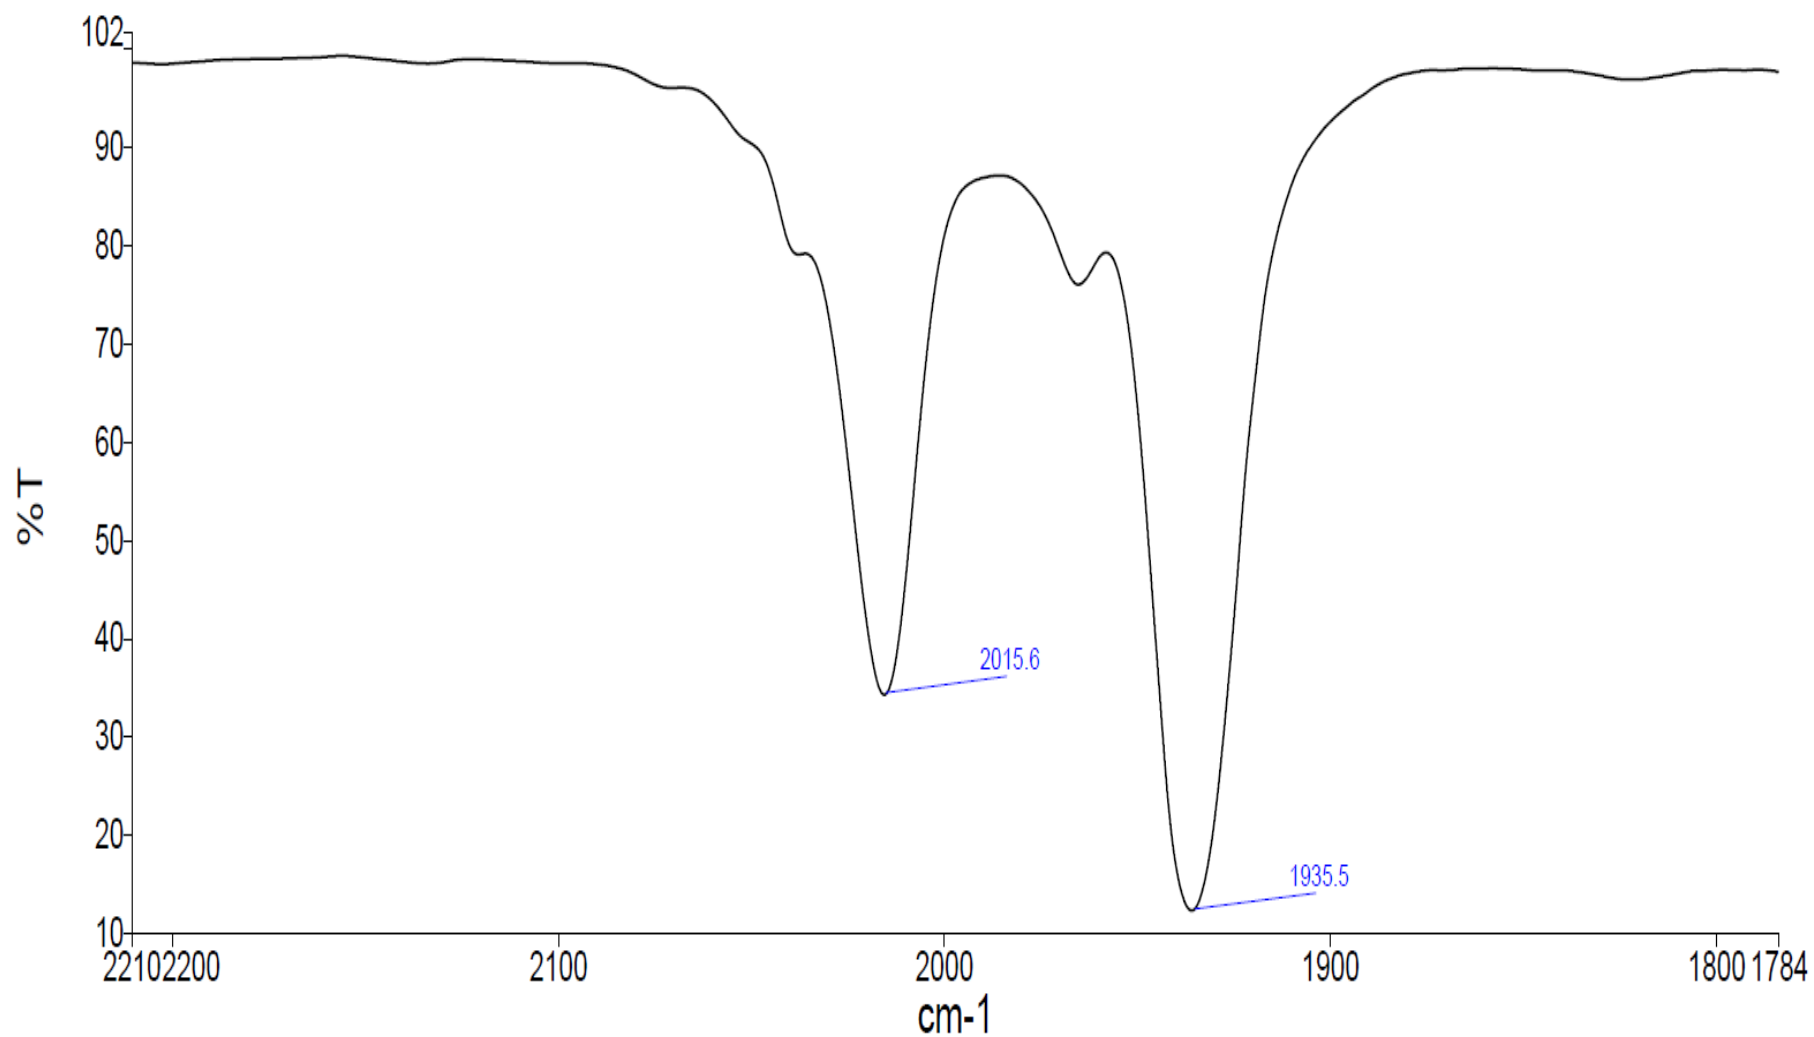

Figure S69: Infrared Spectrum of  $[\text{Mo}(\text{SCPPH}_3)(\text{CO})_2(\text{Tp}^*)]\text{PF}_6$  (4a;  $\text{CH}_2\text{Cl}_2$ , 25 °C, v)

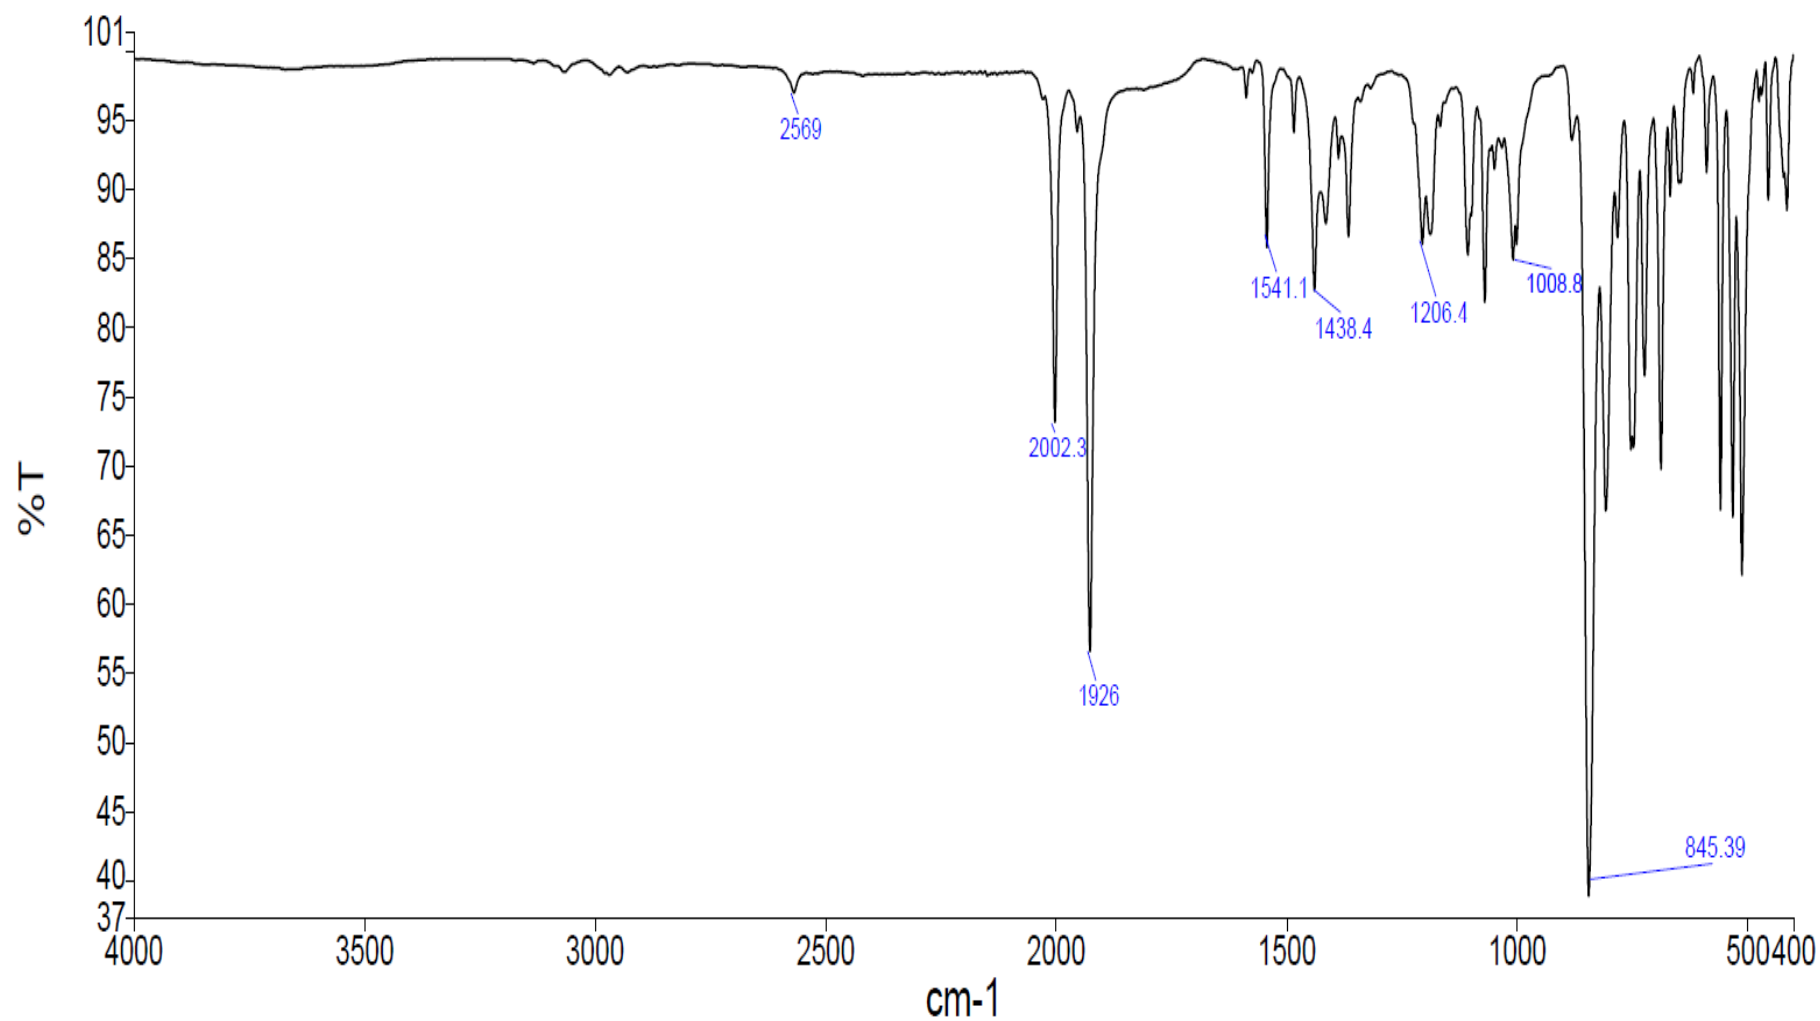

Figure S70: Infrared Spectrum of [Mo(SCPPH<sub>3</sub>)(CO)<sub>2</sub>(Tp<sup>\*</sup>)]PF<sub>6</sub> (4a; ATR, 25 °C, ν)

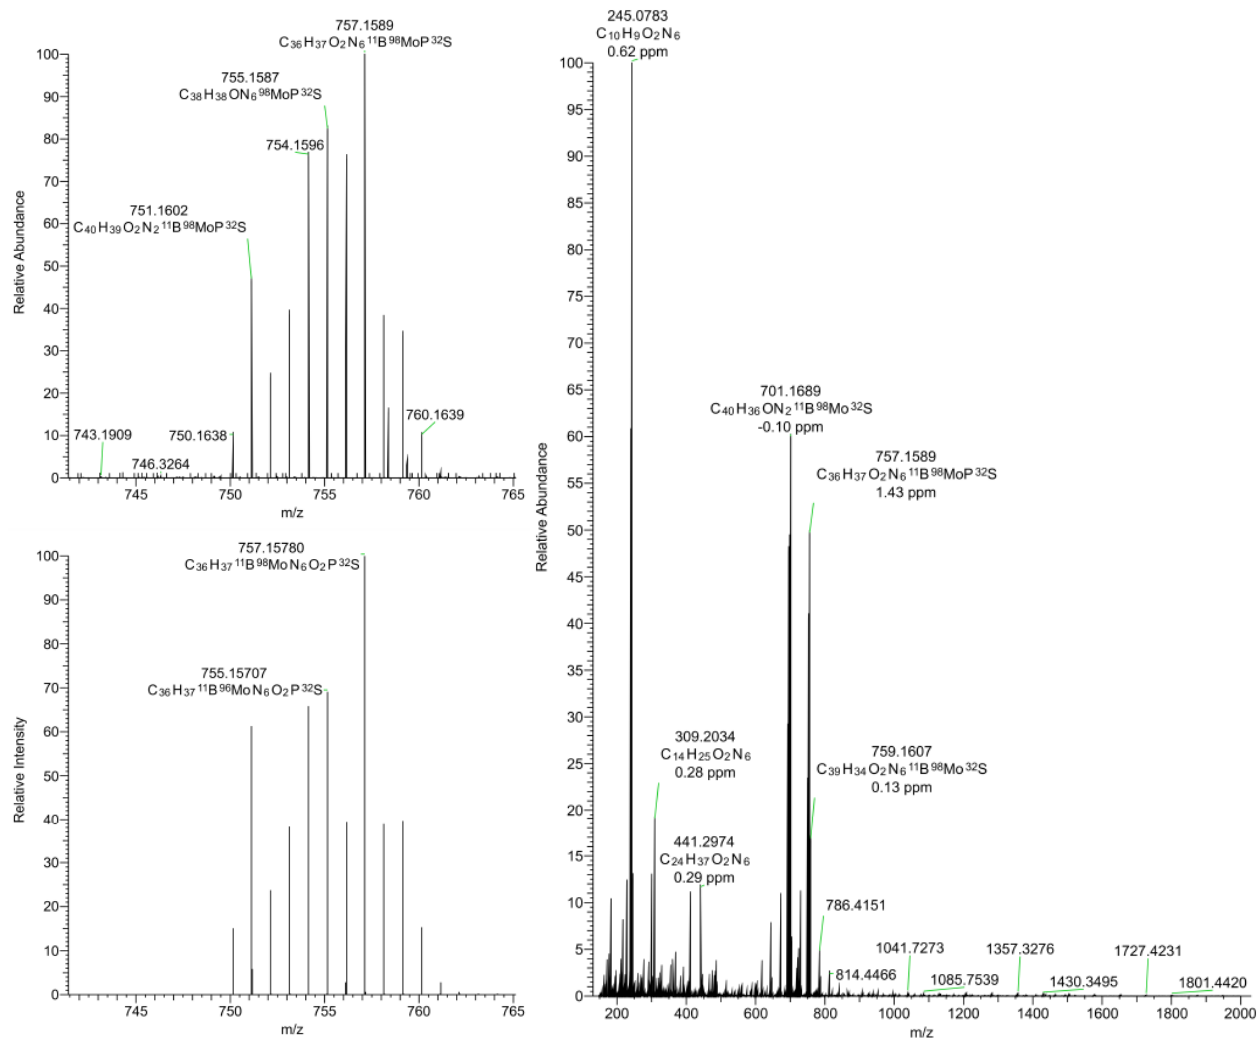

Figure S71: Mass Spectrum (ESI, +ve ion) of  $[\text{Mo}(\text{SCPh}_3)(\text{CO})_2(\text{Tp}^*)]\text{PF}_6$  (4a)

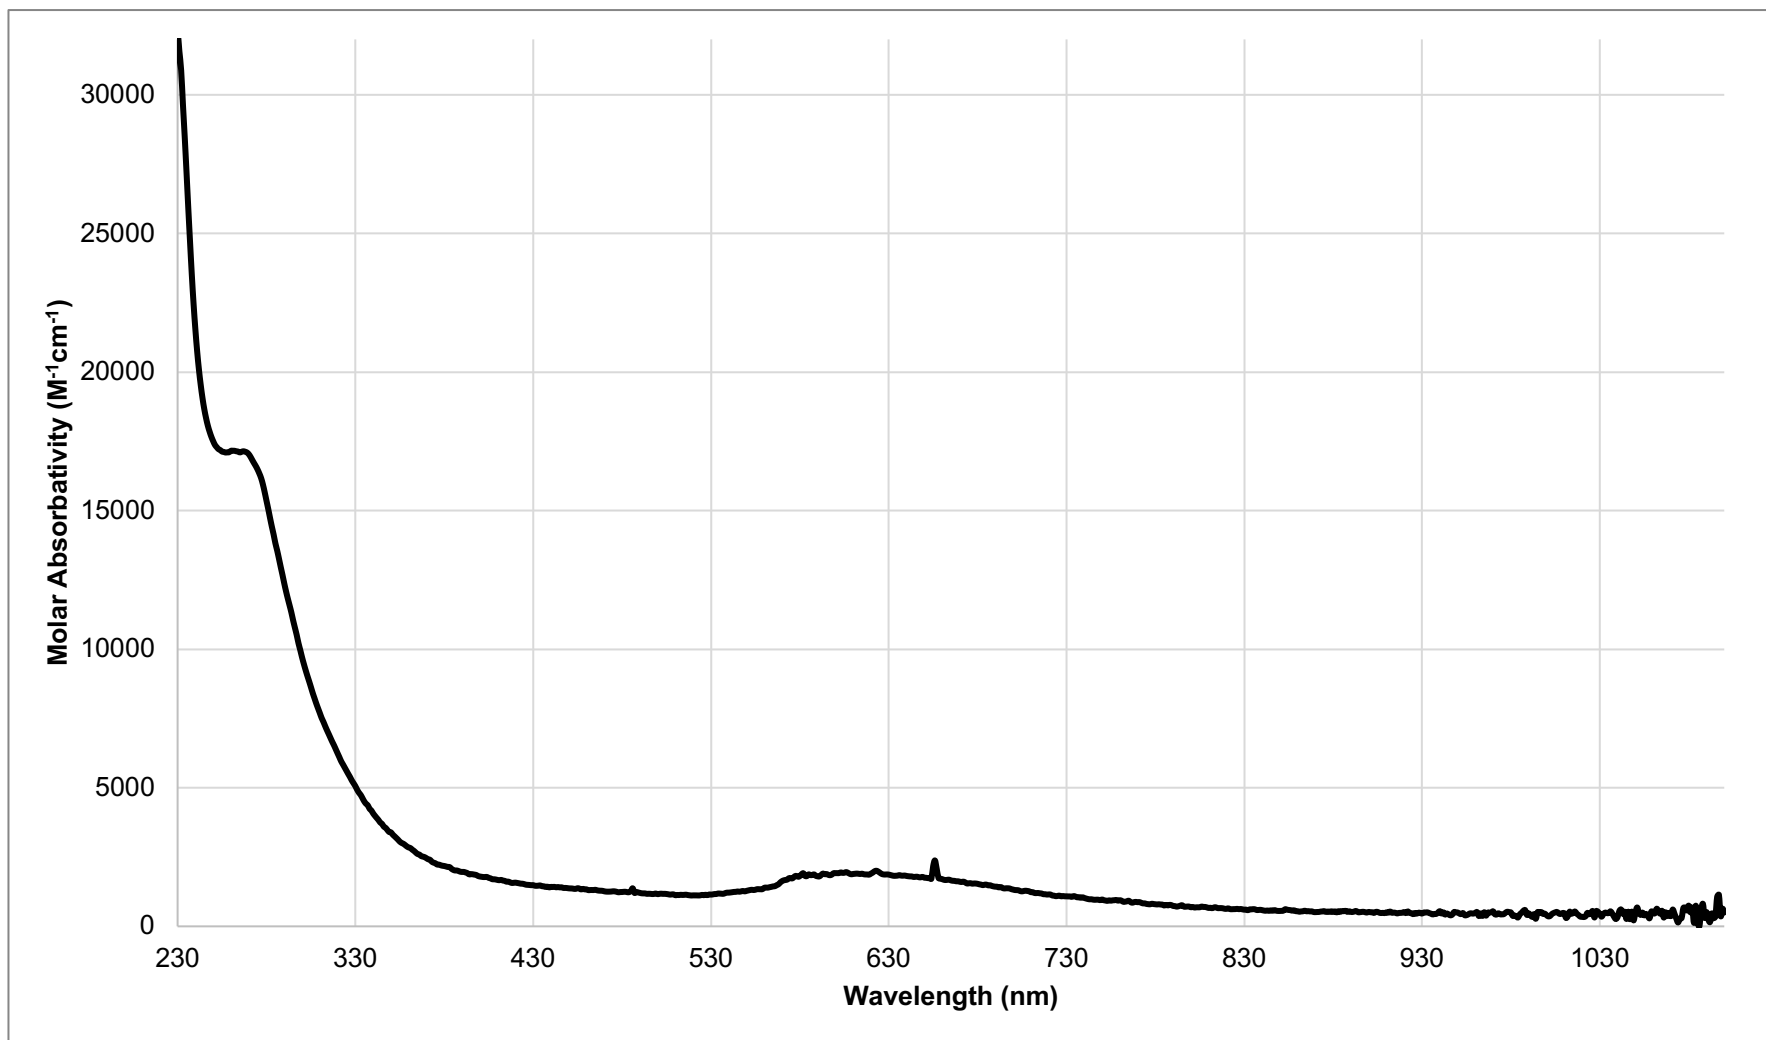

Figure S72: Electronic spectrum of [Mo(SCPPH<sub>3</sub>)(CO)<sub>2</sub>(Tp\*)].PF<sub>6</sub> in CH<sub>2</sub>Cl<sub>2</sub> [4a;  $M = 2.731(3) \times 10^{-5} \text{ mol l}^{-1}$ ].



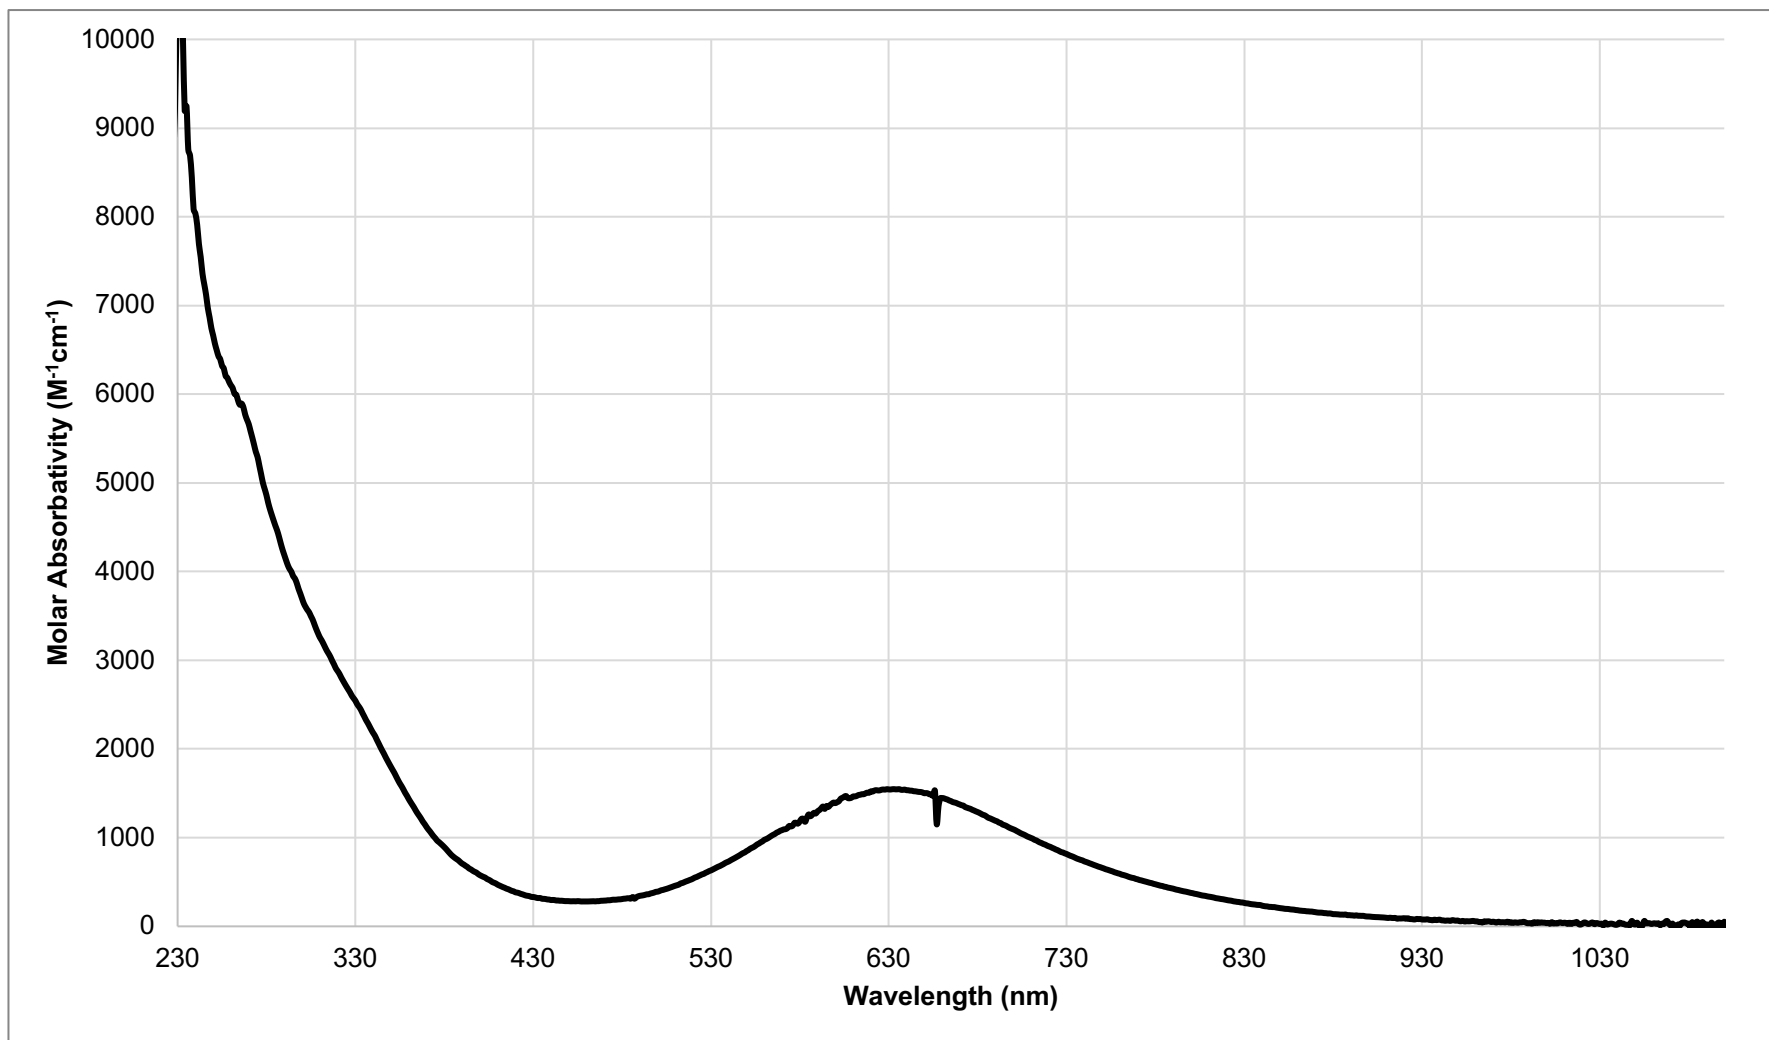

Figure S73: Electronic spectrum of  $[Mo(SCPPH_3)(CO)_2(Tp^*)].PF_6$  in  $CH_2Cl_2$  [4a;  $M = 2.731(3) \times 10^{-4} \text{ molL}^{-1}$ ].

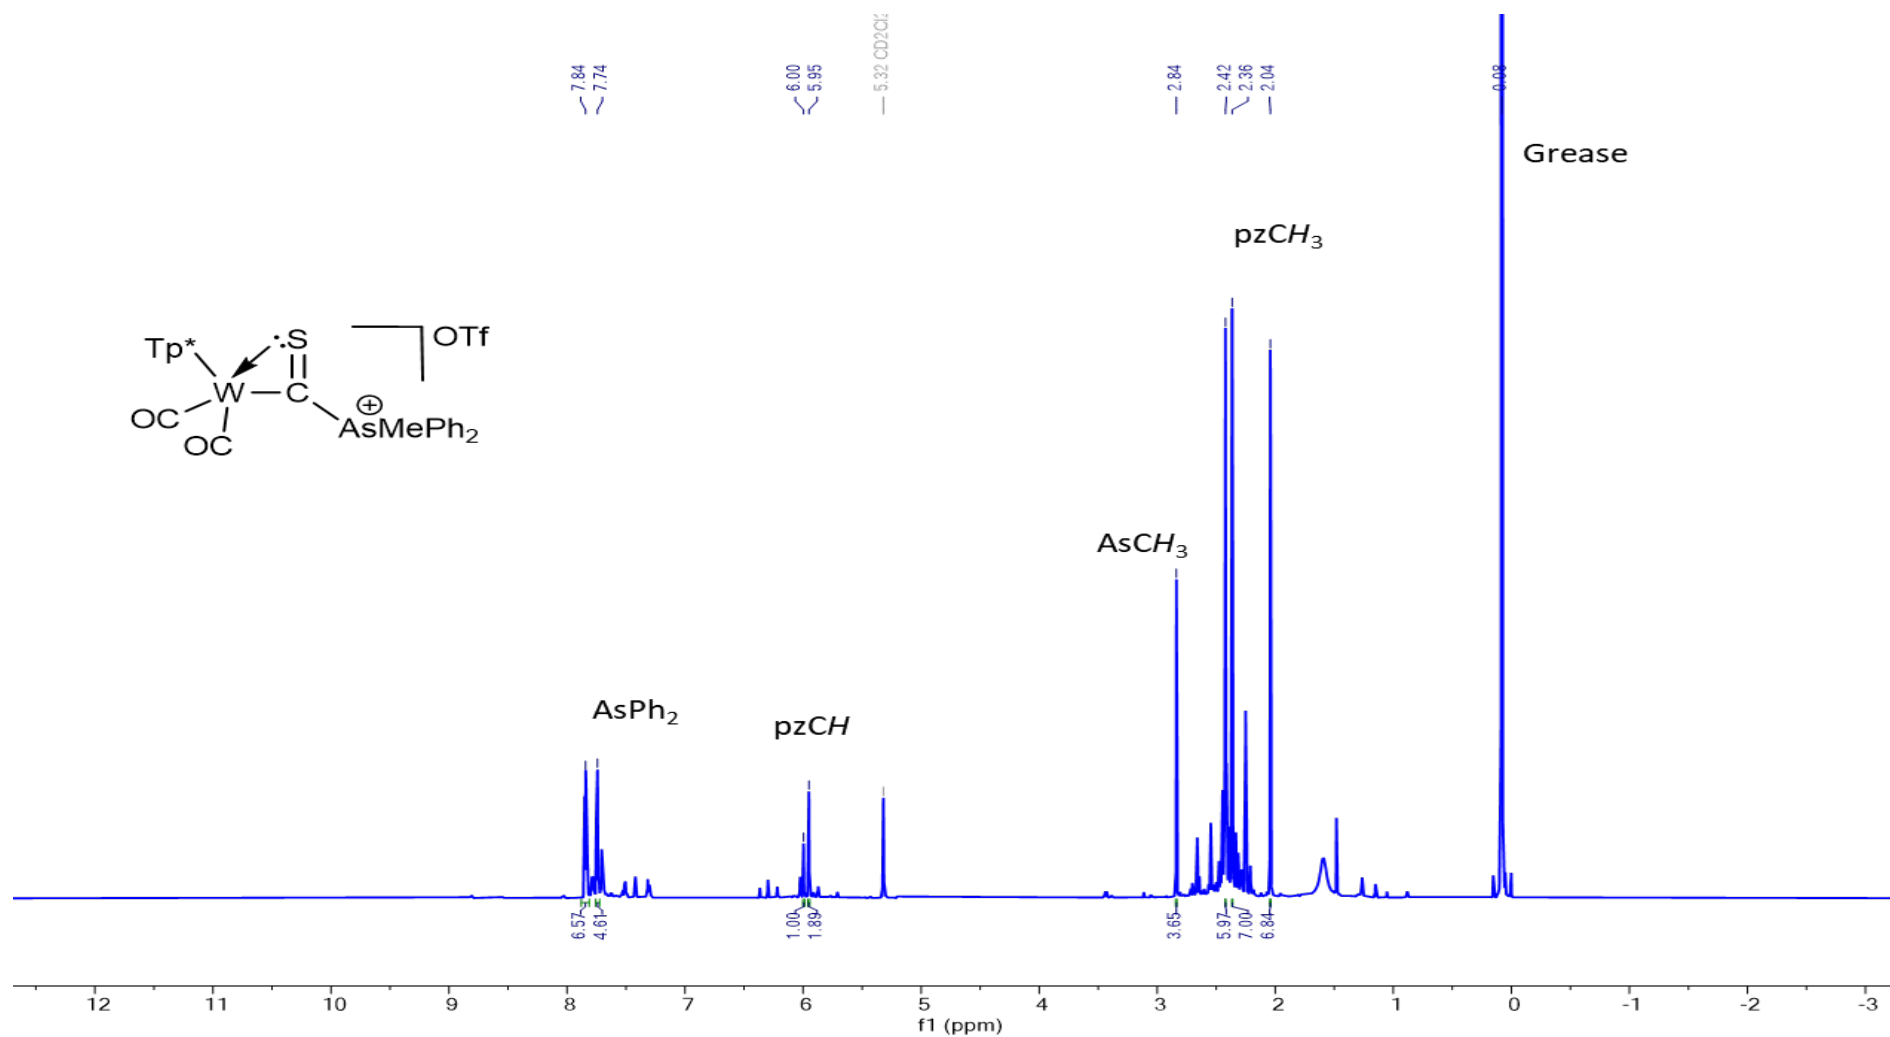

Figure S74:  $^1\text{H}$  NMR Spectrum of  $[\text{W}(\text{SCAsMePh}_2)(\text{CO})_2(\text{Tp}^*)]\text{PF}_6$  (7b; 800 MHz,  $\text{CD}_2\text{Cl}_2$ , 25 °C,  $\delta$ )

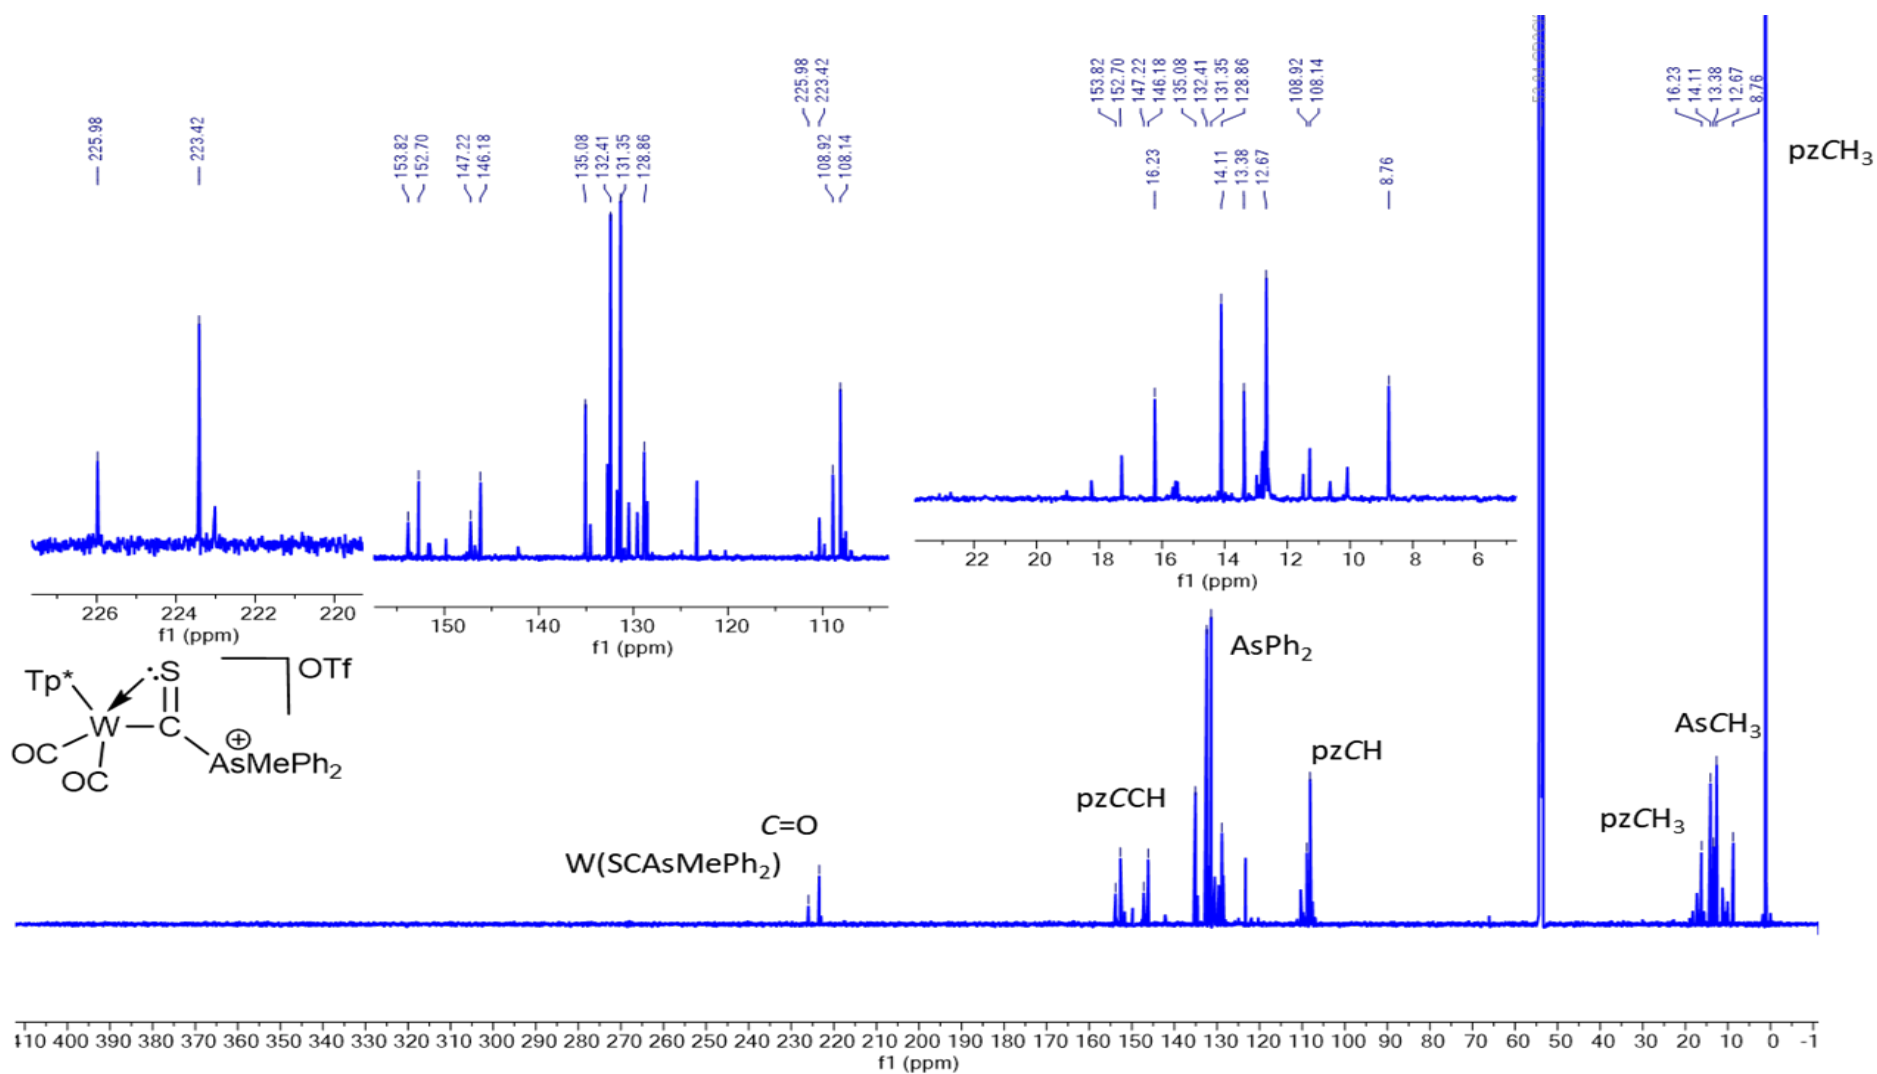

Figure S75:  $^{13}C\{^1H\}$  NMR Spectrum of  $[W(SCAsMePh_2)(CO)_2(Tp^*)]PF_6$  (7b; 200 MHz,  $CD_2Cl_2$ , 25 °C,  $\delta$ )

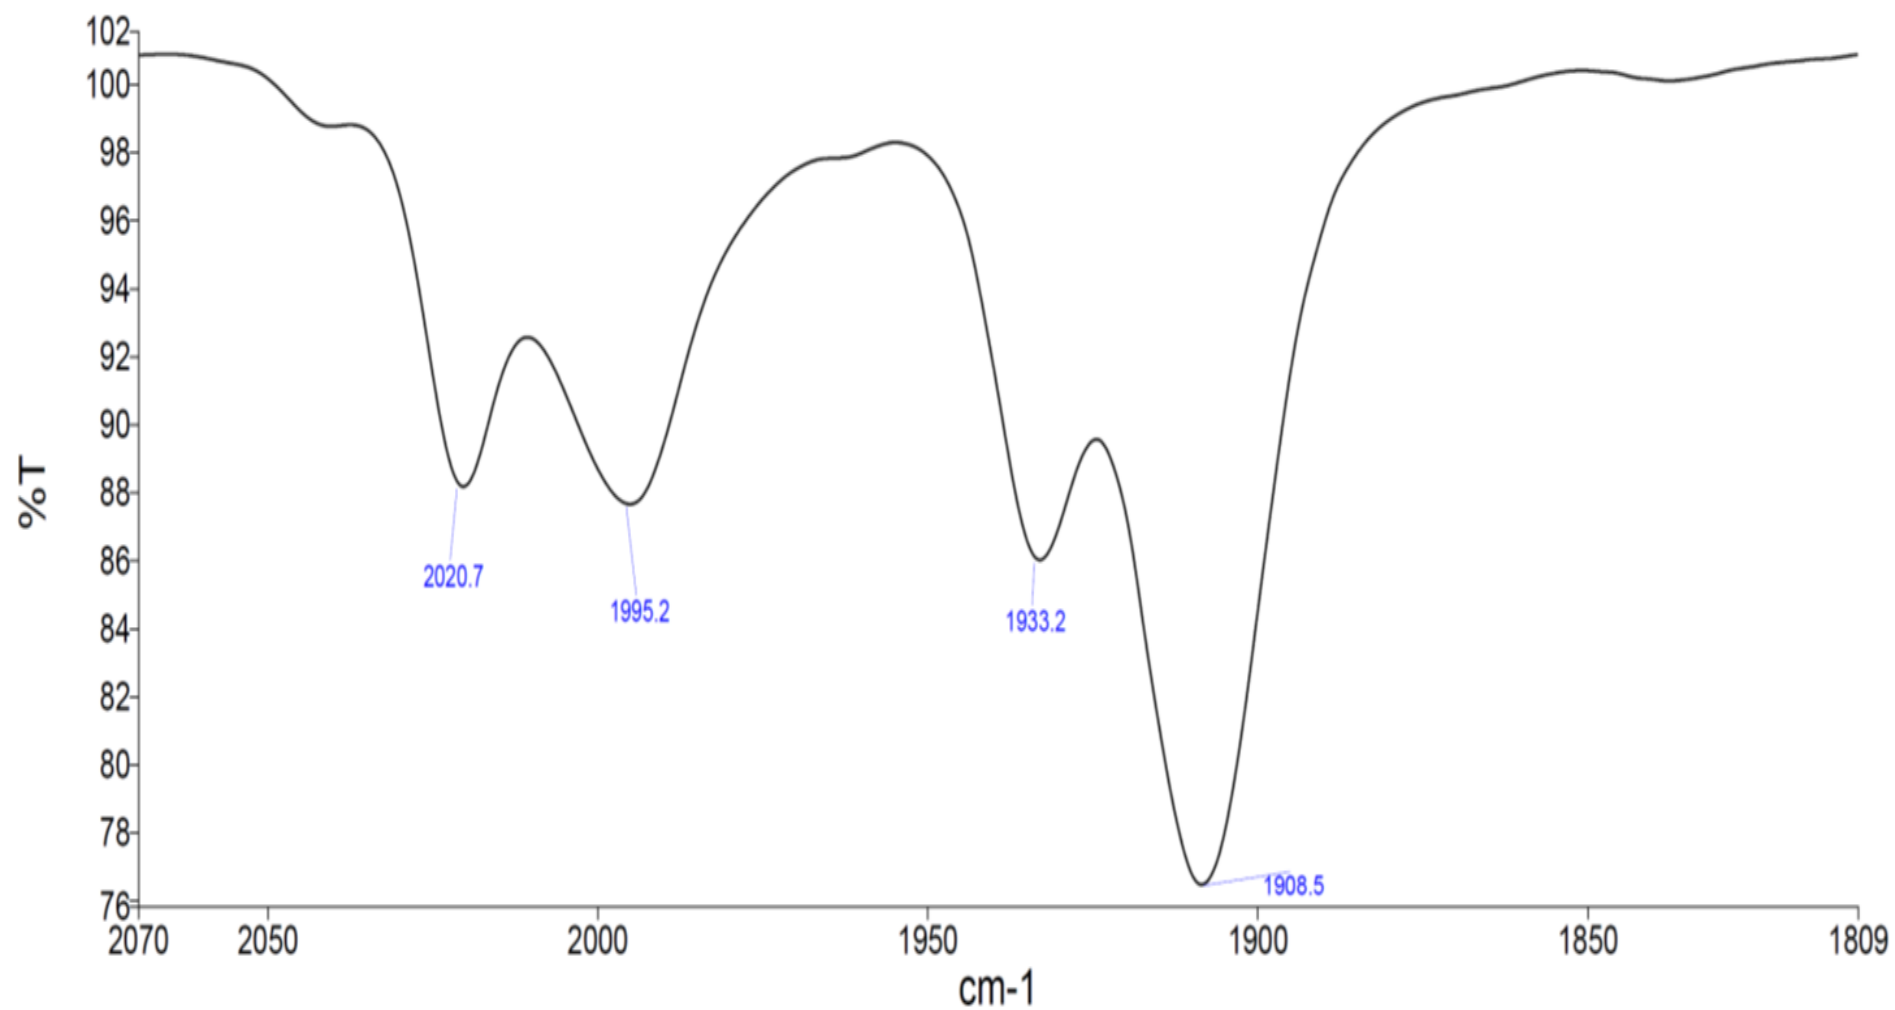

Figure S76: Infrared Spectrum of [W(SCAsMePh<sub>2</sub>)(CO)<sub>2</sub>(Tp\*)]PF<sub>6</sub> (7b; CH<sub>2</sub>Cl<sub>2</sub>, 25 °C, v)

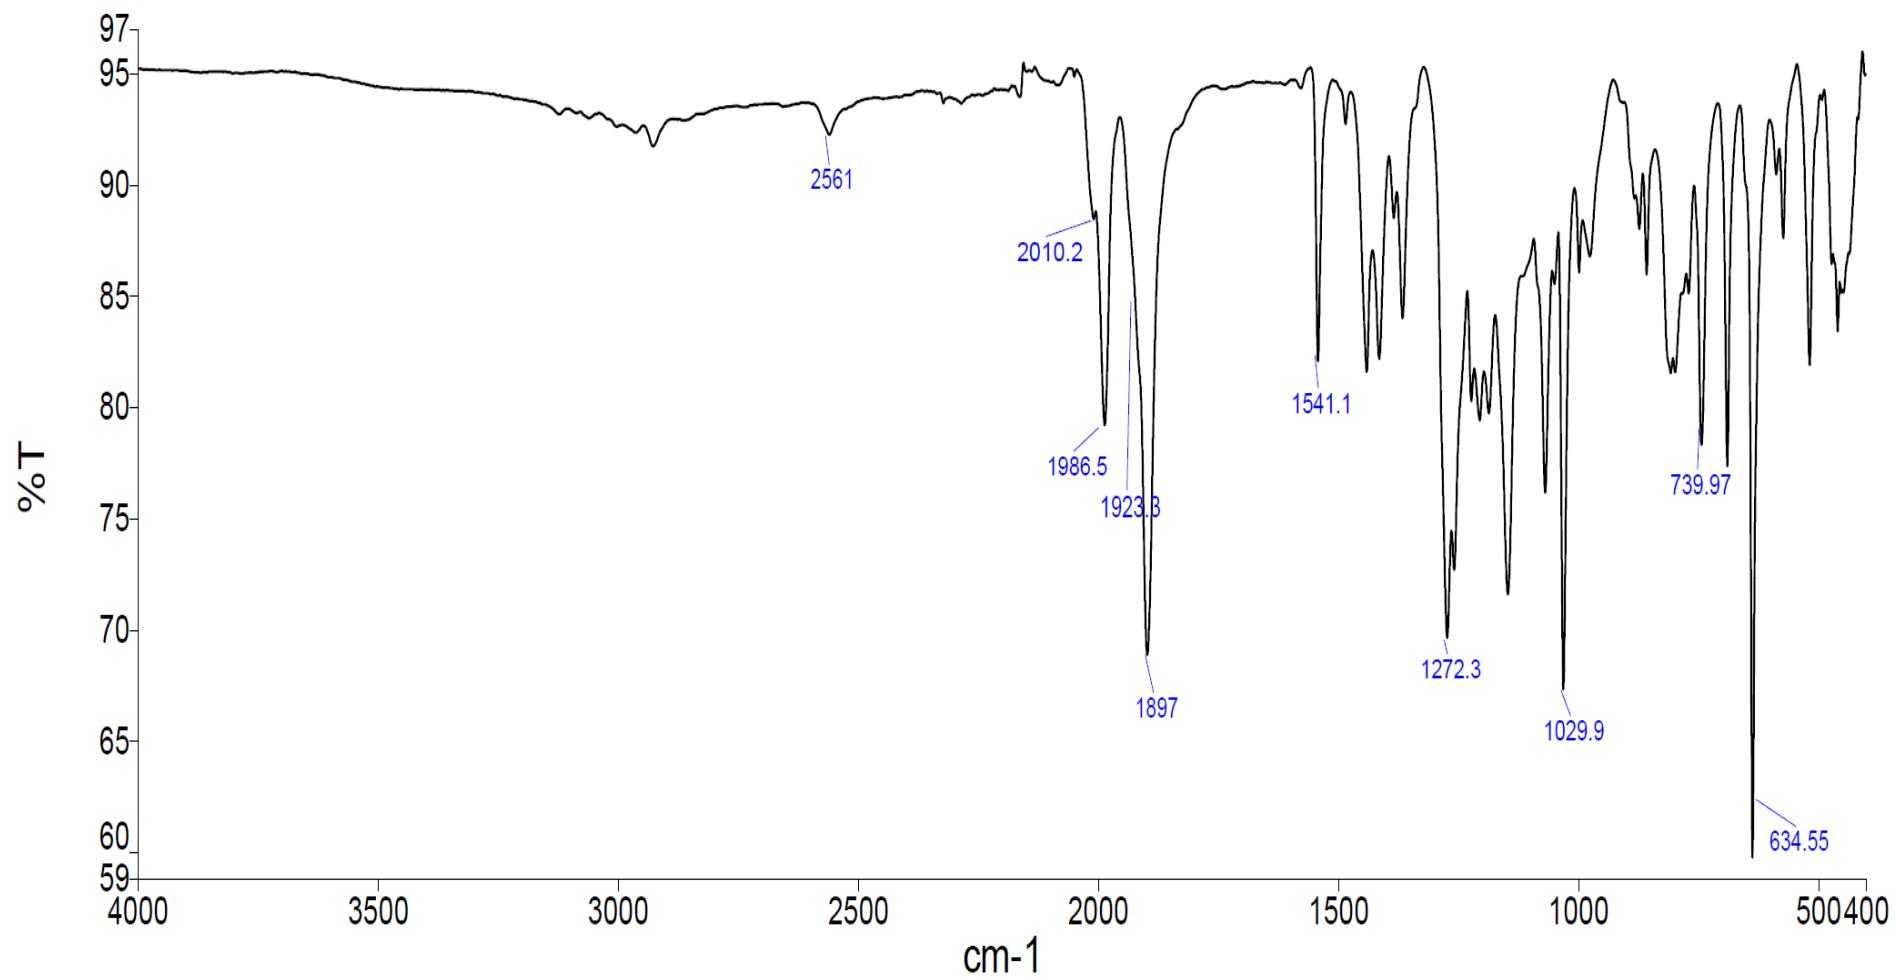

Figure S77: Infrared Spectrum of [W(SCAsMePh<sub>2</sub>)(CO)<sub>2</sub>(Tp\*)]PF<sub>6</sub> (7b; ATR, 25 °C, v)

## ELECTRONIC SUPPORTING INFORMATION

## Chemical Communications

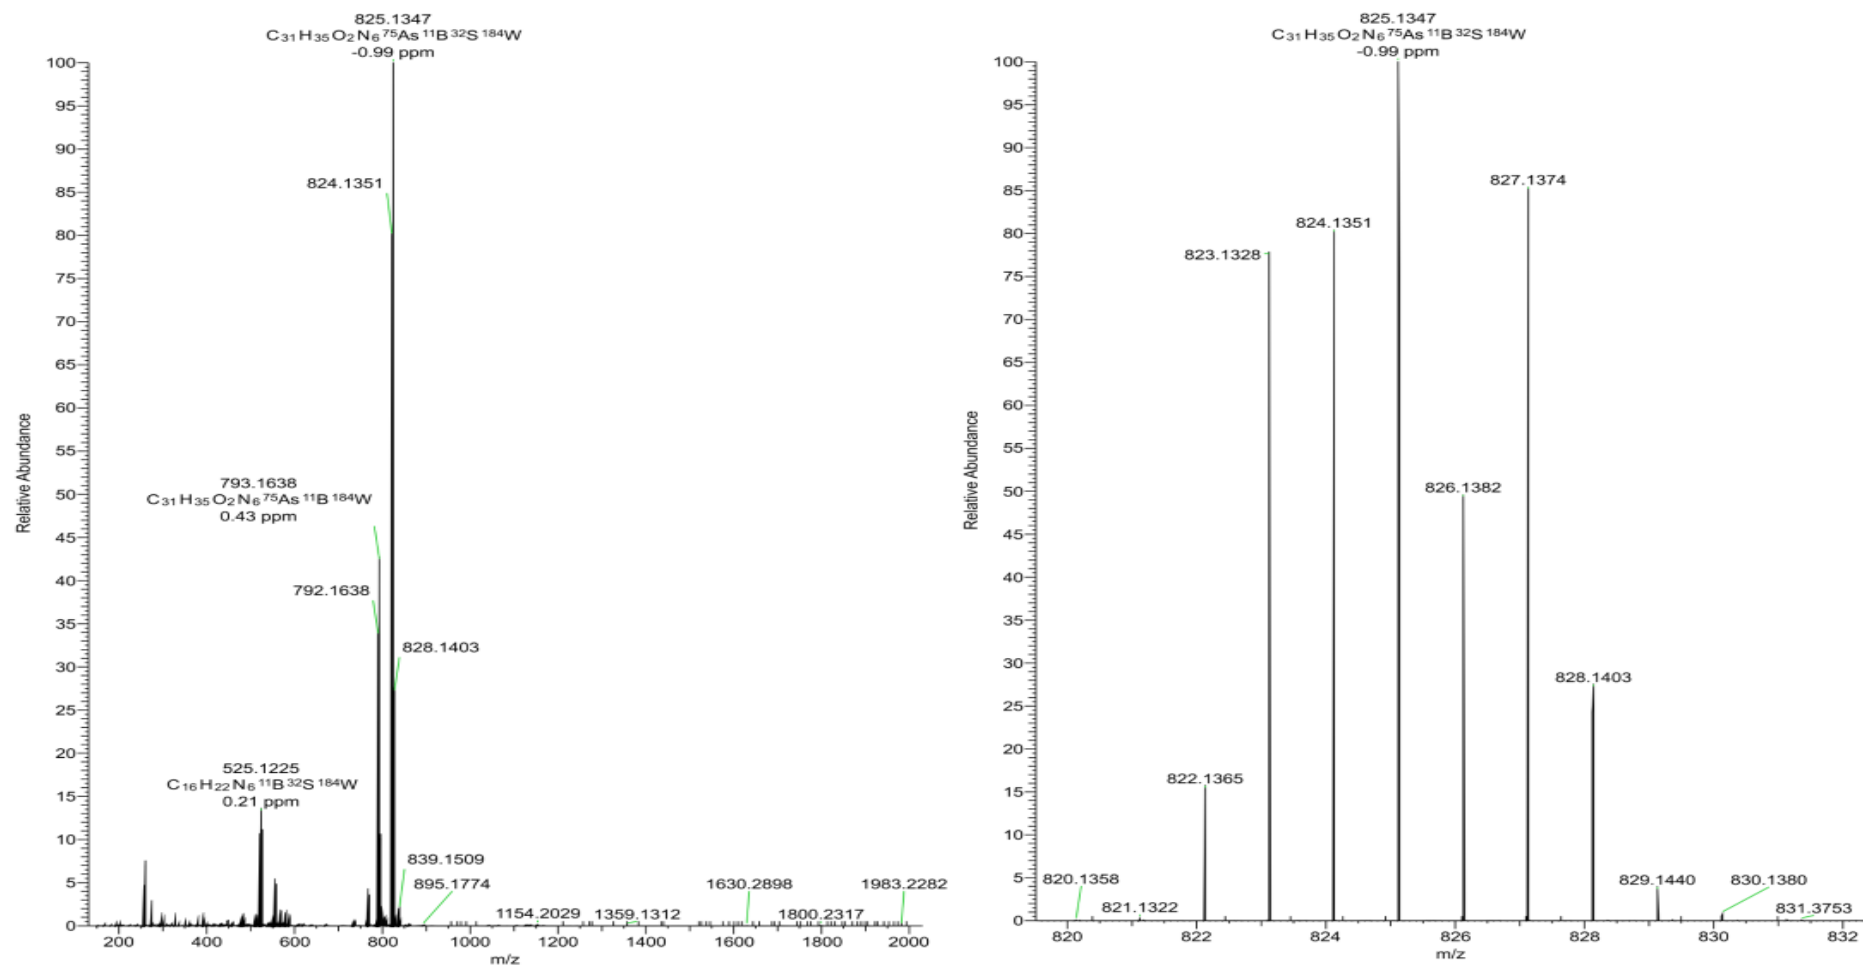

Figure S78: Mass Spectrum (ESI, +ve ion) of  $[W(SCAsMePh_2)(CO)_2(Tp^*)]PF_6$  (7b)
